# Supplementary material for: Unconventional Gas and Oil Drilling Is Associated with Increased Hospital Utilization Rates
Source: PLoS One. 2015 Jul 15;10(7):e0131093. doi: 10.1371/journal.pone.0131093 (PMC4503720; doi:10.1371/journal.pone.0131093)
Supplement: S1 Table — These data are partitioned into three tabs: ICD-9 diagnosis codes, MSDRGs and MSDRG product lines included. (XLSX) [file pone.0131093.s001.xlsx]

## Sheet: ICD-9 DX
ICD-9 DX	ICD-9 DX NAME	PRODUCT	2009	2010	2011	2012
0010	CHOLERA DUE TO VIBRIO CHOLERAE	IMMUNOLOGY	X	X	X	X
0011	CHOLERA DUE TO VIBRIO CHOLERAE EL TOR	IMMUNOLOGY	X	X	X	X
0019	CHOLERA, UNSPECIFIED	IMMUNOLOGY	X	X	X	X
0020	TYPHOID FEVER	IMMUNOLOGY	X	X	X	X
0021	PARATYPHOID FEVER A	IMMUNOLOGY	X	X	X	X
0022	PARATYPHOID FEVER B	IMMUNOLOGY	X	X	X	X
0023	PARATYPHOID FEVER C	IMMUNOLOGY	X	X	X	X
0029	PARATYPHOID FEVER, UNSPECIFIED	IMMUNOLOGY	X	X	X	X
0030	SALMONELLA GASTROENTERITIS	IMMUNOLOGY	X	X	X	X
0031	SALMONELLA SEPTICEMIA	IMMUNOLOGY	X	X	X	X
00320	LOCALIZED SALMONELLA INFECTION, UNSPECIFIED	IMMUNOLOGY	X	X	X	X
00321	SALMONELLA MENINGITIS	IMMUNOLOGY	X	X	X	X
00322	SALMONELLA PNEUMONIA	IMMUNOLOGY	X	X	X	X
00323	SALMONELLA ARTHRITIS	IMMUNOLOGY	X	X	X	X
00324	SALMONELLA OSTEOMYELITIS	IMMUNOLOGY	X	X	X	X
00329	OTHER LOCALIZED SALMONELLA INFECTIONS	IMMUNOLOGY	X	X	X	X
0038	OTHER SPECIFIED SALMONELLA INFECTIONS	IMMUNOLOGY	X	X	X	X
0039	SALMONELLA INFECTION, UNSPECIFIED	IMMUNOLOGY	X	X	X	X
0040	SHIGELLA DYSENTERIAE	IMMUNOLOGY	X	X	X	X
0041	SHIGELLA FLEXNERI	IMMUNOLOGY	X	X	X	X
0042	SHIGELLA BOYDII	IMMUNOLOGY	X	X	X	X
0043	SHIGELLA SONNEI	IMMUNOLOGY	X	X	X	X
0048	OTHER SPECIFIED SHIGELLA INFECTIONS	IMMUNOLOGY	X	X	X	X
0049	SHIGELLOSIS, UNSPECIFIED	IMMUNOLOGY	X	X	X	X
0050	STAPHYLOCOCCAL FOOD POISONING	IMMUNOLOGY	X	X	X	X
0051	BOTULISM FOOD POISONING	IMMUNOLOGY	X	X	X	X
0052	FOOD POISONING DUE TO CLOSTRIDIUM PERFRINGENS [C.	IMMUNOLOGY	X	X	X	X
0053	FOOD POISONING DUE TO OTHER CLOSTRIDIA	IMMUNOLOGY	X	X	X	X
0054	FOOD POISONING DUE TO VIBRIO PARAHAEMOLYTICUS	IMMUNOLOGY	X	X	X	X
00581	FOOD POISONING DUE TO VIBRIO VULNIFICUS	IMMUNOLOGY	X	X	X	X
00589	OTHER BACTERIAL FOOD POISONING	IMMUNOLOGY	X	X	X	X
0059	FOOD POISONING, UNSPECIFIED	IMMUNOLOGY	X	X	X	X
0060	ACUTE AMEBIC DYSENTERY WITHOUT MENTION OF ABSCESS	IMMUNOLOGY	X	X	X	X
0061	CHRONIC INTESTINAL AMEBIASIS WITHOUT MENTION OF AB	IMMUNOLOGY	X	X	X	X
0062	AMEBIC NONDYSENTERIC COLITIS	IMMUNOLOGY	X	X	X	X
0063	AMEBIC LIVER ABSCESS	IMMUNOLOGY	X	X	X	X
0064	AMEBIC LUNG ABSCESS	IMMUNOLOGY	X	X	X	X
0065	AMEBIC BRAIN ABSCESS	IMMUNOLOGY	X	X	X	X
0066	AMEBIC SKIN ULCERATION	IMMUNOLOGY	X	X	X	X
0068	AMEBIC INFECTION OF OTHER SITES	IMMUNOLOGY	X	X	X	X
0069	AMEBIASIS, UNSPECIFIED	IMMUNOLOGY	X	X	X	X
0070	BALANTIDIASIS	IMMUNOLOGY	X	X	X	X
0071	GIARDIASIS	IMMUNOLOGY	X	X	X	X
0072	COCCIDIOSIS	IMMUNOLOGY	X	X	X	X
0073	INTESTINAL TRICHOMONIASIS	IMMUNOLOGY	X	X	X	X
0074	CRYPTOSPORIDIOSIS	IMMUNOLOGY	X	X	X	X
0075	CYCLOSPORIASIS	IMMUNOLOGY	X	X	X	X
0078	OTHER SPECIFIED PROTOZOAL INTESTINAL DISEASES	IMMUNOLOGY	X	X	X	X
0079	UNSPECIFIED PROTOZOAL INTESTINAL DISEASE	IMMUNOLOGY	X	X	X	X
00800	INTESTINAL INFECTION DUE TO UNSPECIFIED E. COLI	IMMUNOLOGY	X	X	X	X
00801	INTESTINAL INFECTION DUE TO ENTEROPATHOGENIC E. CO	IMMUNOLOGY	X	X	X	X
00802	INTESTINAL INFECTION DUE TO ENTEROTOXIGENIC E. COL	IMMUNOLOGY	X	X	X	X
00803	INTESTINAL INFECTION DUE TO ENTEROINVASIVE E. COLI	IMMUNOLOGY	X	X	X	X
00804	INTESTINAL INFECTION DUE TO ENTEROHEMORRHAGIC E. C	IMMUNOLOGY	X	X	X	X
00809	OTHER INTESTINAL E. COLI INFECTIONS	IMMUNOLOGY	X	X	X	X
0081	INTESTINAL INFECTION DUE TO ARIZONA GROUP OF PARAC	IMMUNOLOGY	X	X	X	X
0082	INTESTINAL INFECTION DUE TO AEROBACTER AEROGENES	IMMUNOLOGY	X	X	X	X
0083	INTESTINAL INFECTION DUE TO PROTEUS (MIRABILIS) (M	IMMUNOLOGY	X	X	X	X
00841	INTESTINAL INFECTION DUE TO STAPHYLOCOCCUS	IMMUNOLOGY	X	X	X	X
00842	INTESTINAL INFECTION DUE TO PSEUDOMONAS	IMMUNOLOGY	X	X	X	X
00843	INTESTINAL INFECTION DUE TO CAMPYLOBACTER	IMMUNOLOGY	X	X	X	X
00844	INTESTINAL INFECTION DUE TO YERSINIA ENTEROCOLITIC	IMMUNOLOGY	X	X	X	X
00845	INTESTINAL INFECTION DUE TO CLOSTRIDIUM DIFFICILE	IMMUNOLOGY	X	X	X	X
00846	INTESTINAL INFECTION DUE TO OTHER ANAEROBES	IMMUNOLOGY	X	X	X	X
00847	INTESTINAL INFECTION DUE TO OTHER GRAM-NEGATIVE BA	IMMUNOLOGY	X	X	X	X
00849	INTESTINAL INFECTION DUE TO OTHER SPECIFIED BACTER	IMMUNOLOGY	X	X	X	X
0085	BACTERIAL ENTERITIS, UNSPECIFIED	IMMUNOLOGY	X	X	X	X
00861	ENTERITIS DUE TO ROTAVIRUS	IMMUNOLOGY	X	X	X	X
00862	ENTERITIS DUE TO ADENOVIRUS	IMMUNOLOGY	X	X	X	X
00863	ENTERITIS DUE TO NORWALK VIRUS	IMMUNOLOGY	X	X	X	X
00864	ENTERITIS DUE TO OTHER SMALL ROUND VIRUSES [SRVS]	IMMUNOLOGY	X	X	X	X
00865	ENTERITIS DUE TO CALICIVIRUS	IMMUNOLOGY	X	X	X	X
00866	ENTERITIS DUE TO ASTROVIRUS	IMMUNOLOGY	X	X	X	X
00867	ENTERITIS DUE TO ENTEROVIRUS NOT ELSEWHERE CLASSIF	IMMUNOLOGY	X	X	X	X
00869	OTHER VIRAL ENTERITIS	IMMUNOLOGY	X	X	X	X
0088	INTESTINAL INFECTION DUE TO OTHER ORGANISM, NOT EL	IMMUNOLOGY	X	X	X	X
0090	INFECTIOUS COLITIS, ENTERITIS, AND GASTROENTERITIS	IMMUNOLOGY	X	X	X	X
0091	COLITIS, ENTERITIS, AND GASTROENTERITIS OF PRESUME	IMMUNOLOGY	X	X	X	X
0092	INFECTIOUS DIARRHEA	IMMUNOLOGY	X	X	X	X
0093	DIARRHEA OF PRESUMED INFECTIOUS ORIGIN	IMMUNOLOGY	X	X	X	X
01000	PRIMARY TUBERCULOUS INFECTION, UNSPECIFIED EXAMINA	IMMUNOLOGY	X	X	X	X
01001	PRIMARY TUBERCULOUS INFECTION, BACTERIOLOGICAL OR	IMMUNOLOGY	X	X	X	X
01002	PRIMARY TUBERCULOUS INFECTION, BACTERIOLOGICAL OR	IMMUNOLOGY	X	X	X	X
01003	PRIMARY TUBERCULOUS INFECTION, TUBERCLE BACILLI FO	IMMUNOLOGY	X	X	X	X
01004	PRIMARY TUBERCULOUS INFECTION, TUBERCLE BACILLI NO	IMMUNOLOGY	X	X	X	X
01005	PRIMARY TUBERCULOUS INFECTION, TUBERCLE BACILLI NO	IMMUNOLOGY	X	X	X	X
01006	PRIMARY TUBERCULOUS INFECTION, TUBERCLE BACILLI NO	IMMUNOLOGY	X	X	X	X
01010	TUBERCULOUS PLEURISY IN PRIMARY PROGRESSIVE TUBERC	IMMUNOLOGY	X	X	X	X
01011	TUBERCULOUS PLEURISY IN PRIMARY PROGRESSIVE TUBERC	IMMUNOLOGY	X	X	X	X
01012	TUBERCULOUS PLEURISY IN PRIMARY PROGRESSIVE TUBERC	IMMUNOLOGY	X	X	X	X
01013	TUBERCULOUS PLEURISY IN PRIMARY PROGRESSIVE TUBERC	IMMUNOLOGY	X	X	X	X
01014	TUBERCULOUS PLEURISY IN PRIMARY PROGRESSIVE TUBERC	IMMUNOLOGY	X	X	X	X
01015	TUBERCULOUS PLEURISY IN PRIMARY PROGRESSIVE TUBERC	IMMUNOLOGY	X	X	X	X
01016	TUBERCULOUS PLEURISY IN PRIMARY PROGRESSIVE TUBERC	IMMUNOLOGY	X	X	X	X
01080	OTHER PRIMARY PROGRESSIVE TUBERCULOSIS, UNSPECIFIE	IMMUNOLOGY	X	X	X	X
01081	OTHER PRIMARY PROGRESSIVE TUBERCULOSIS, BACTERIOLO	IMMUNOLOGY	X	X	X	X
01082	OTHER PRIMARY PROGRESSIVE TUBERCULOSIS, BACTERIOLO	IMMUNOLOGY	X	X	X	X
01083	OTHER PRIMARY PROGRESSIVE TUBERCULOSIS, TUBERCLE B	IMMUNOLOGY	X	X	X	X
01084	OTHER PRIMARY PROGRESSIVE TUBERCULOSIS, TUBERCLE B	IMMUNOLOGY	X	X	X	X
01085	OTHER PRIMARY PROGRESSIVE TUBERCULOSIS, TUBERCLE B	IMMUNOLOGY	X	X	X	X
01086	OTHER PRIMARY PROGRESSIVE TUBERCULOSIS, TUBERCLE B	IMMUNOLOGY	X	X	X	X
01090	PRIMARY TUBERCULOUS INFECTION, UNSPECIFIED TYPE, U	IMMUNOLOGY	X	X	X	X
01091	PRIMARY TUBERCULOUS INFECTION, UNSPECIFIED TYPE, B	IMMUNOLOGY	X	X	X	X
01092	PRIMARY TUBERCULOUS INFECTION, UNSPECIFIED TYPE, B	IMMUNOLOGY	X	X	X	X
01093	PRIMARY TUBERCULOUS INFECTION, UNSPECIFIED TYPE, T	IMMUNOLOGY	X	X	X	X
01094	PRIMARY TUBERCULOUS INFECTION, UNSPECIFIED TYPE, T	IMMUNOLOGY	X	X	X	X
01095	PRIMARY TUBERCULOUS INFECTION, UNSPECIFIED TYPE, T	IMMUNOLOGY	X	X	X	X
01096	PRIMARY TUBERCULOUS INFECTION, UNSPECIFIED TYPE, T	IMMUNOLOGY	X	X	X	X
01100	TUBERCULOSIS OF LUNG, INFILTRATIVE, UNSPECIFIED EX	IMMUNOLOGY	X	X	X	X
01101	TUBERCULOSIS OF LUNG, INFILTRATIVE, BACTERIOLOGICA	IMMUNOLOGY	X	X	X	X
01102	TUBERCULOSIS OF LUNG, INFILTRATIVE, BACTERIOLOGICA	IMMUNOLOGY	X	X	X	X
01103	TUBERCULOSIS OF LUNG, INFILTRATIVE, TUBERCLE BACIL	IMMUNOLOGY	X	X	X	X
01104	TUBERCULOSIS OF LUNG, INFILTRATIVE, TUBERCLE BACIL	IMMUNOLOGY	X	X	X	X
01105	TUBERCULOSIS OF LUNG, INFILTRATIVE, TUBERCLE BACIL	IMMUNOLOGY	X	X	X	X
01106	TUBERCULOSIS OF LUNG, INFILTRATIVE, TUBERCLE BACIL	IMMUNOLOGY	X	X	X	X
01110	TUBERCULOSIS OF LUNG, NODULAR, UNSPECIFIED EXAMINA	IMMUNOLOGY	X	X	X	X
01111	TUBERCULOSIS OF LUNG, NODULAR, BACTERIOLOGICAL OR	IMMUNOLOGY	X	X	X	X
01112	TUBERCULOSIS OF LUNG, NODULAR, BACTERIOLOGICAL OR	IMMUNOLOGY	X	X	X	X
01113	TUBERCULOSIS OF LUNG, NODULAR, TUBERCLE BACILLI FO	IMMUNOLOGY	X	X	X	X
01114	TUBERCULOSIS OF LUNG, NODULAR, TUBERCLE BACILLI NO	IMMUNOLOGY	X	X	X	X
01115	TUBERCULOSIS OF LUNG, NODULAR, TUBERCLE BACILLI NO	IMMUNOLOGY	X	X	X	X
01116	TUBERCULOSIS OF LUNG, NODULAR, TUBERCLE BACILLI NO	IMMUNOLOGY	X	X	X	X
01120	TUBERCULOSIS OF LUNG WITH CAVITATION, UNSPECIFIED	IMMUNOLOGY	X	X	X	X
01121	TUBERCULOSIS OF LUNG WITH CAVITATION, BACTERIOLOGI	IMMUNOLOGY	X	X	X	X
01122	TUBERCULOSIS OF LUNG WITH CAVITATION, BACTERIOLOGI	IMMUNOLOGY	X	X	X	X
01123	TUBERCULOSIS OF LUNG WITH CAVITATION, TUBERCLE BAC	IMMUNOLOGY	X	X	X	X
01124	TUBERCULOSIS OF LUNG WITH CAVITATION, TUBERCLE BAC	IMMUNOLOGY	X	X	X	X
01125	TUBERCULOSIS OF LUNG WITH CAVITATION, TUBERCLE BAC	IMMUNOLOGY	X	X	X	X
01126	TUBERCULOSIS OF LUNG WITH CAVITATION, TUBERCLE BAC	IMMUNOLOGY	X	X	X	X
01130	TUBERCULOSIS OF BRONCHUS, UNSPECIFIED EXAMINATION	IMMUNOLOGY	X	X	X	X
01131	TUBERCULOSIS OF BRONCHUS, BACTERIOLOGICAL OR HISTO	IMMUNOLOGY	X	X	X	X
01132	TUBERCULOSIS OF BRONCHUS, BACTERIOLOGICAL OR HISTO	IMMUNOLOGY	X	X	X	X
01133	TUBERCULOSIS OF BRONCHUS, TUBERCLE BACILLI FOUND (	IMMUNOLOGY	X	X	X	X
01134	TUBERCULOSIS OF BRONCHUS, TUBERCLE BACILLI NOT FOU	IMMUNOLOGY	X	X	X	X
01135	TUBERCULOSIS OF BRONCHUS, TUBERCLE BACILLI NOT FOU	IMMUNOLOGY	X	X	X	X
01136	TUBERCULOSIS OF BRONCHUS, TUBERCLE BACILLI NOT FOU	IMMUNOLOGY	X	X	X	X
01140	TUBERCULOUS FIBROSIS OF LUNG, UNSPECIFIED EXAMINAT	IMMUNOLOGY	X	X	X	X
01141	TUBERCULOUS FIBROSIS OF LUNG, BACTERIOLOGICAL OR H	IMMUNOLOGY	X	X	X	X
01142	TUBERCULOUS FIBROSIS OF LUNG, BACTERIOLOGICAL OR H	IMMUNOLOGY	X	X	X	X
01143	TUBERCULOUS FIBROSIS OF LUNG, TUBERCLE BACILLI FOU	IMMUNOLOGY	X	X	X	X
01144	TUBERCULOUS FIBROSIS OF LUNG, TUBERCLE BACILLI NOT	IMMUNOLOGY	X	X	X	X
01145	TUBERCULOUS FIBROSIS OF LUNG, TUBERCLE BACILLI NOT	IMMUNOLOGY	X	X	X	X
01146	TUBERCULOUS FIBROSIS OF LUNG, TUBERCLE BACILLI NOT	IMMUNOLOGY	X	X	X	X
01150	TUBERCULOUS BRONCHIECTASIS, UNSPECIFIED EXAMINATIO	IMMUNOLOGY	X	X	X	X
01151	TUBERCULOUS BRONCHIECTASIS, BACTERIOLOGICAL OR HIS	IMMUNOLOGY	X	X	X	X
01152	TUBERCULOUS BRONCHIECTASIS, BACTERIOLOGICAL OR HIS	IMMUNOLOGY	X	X	X	X
01153	TUBERCULOUS BRONCHIECTASIS, TUBERCLE BACILLI FOUND	IMMUNOLOGY	X	X	X	X
01154	TUBERCULOUS BRONCHIECTASIS, TUBERCLE BACILLI NOT F	IMMUNOLOGY	X	X	X	X
01155	TUBERCULOUS BRONCHIECTASIS, TUBERCLE BACILLI NOT F	IMMUNOLOGY	X	X	X	X
01156	TUBERCULOUS BRONCHIECTASIS, TUBERCLE BACILLI NOT F	IMMUNOLOGY	X	X	X	X
01160	TUBERCULOUS PNEUMONIA (ANY FORM), UNSPECIFIED EXAM	IMMUNOLOGY	X	X	X	X
01161	TUBERCULOUS PNEUMONIA (ANY FORM), BACTERIOLOGICAL	IMMUNOLOGY	X	X	X	X
01162	TUBERCULOUS PNEUMONIA (ANY FORM), BACTERIOLOGICAL	IMMUNOLOGY	X	X	X	X
01163	TUBERCULOUS PNEUMONIA (ANY FORM), TUBERCLE BACILLI	IMMUNOLOGY	X	X	X	X
01164	TUBERCULOUS PNEUMONIA (ANY FORM), TUBERCLE BACILLI	IMMUNOLOGY	X	X	X	X
01165	TUBERCULOUS PNEUMONIA (ANY FORM), TUBERCLE BACILLI	IMMUNOLOGY	X	X	X	X
01166	TUBERCULOUS PNEUMONIA (ANY FORM), TUBERCLE BACILLI	IMMUNOLOGY	X	X	X	X
01170	TUBERCULOUS PNEUMOTHORAX, UNSPECIFIED EXAMINATION	IMMUNOLOGY	X	X	X	X
01171	TUBERCULOUS PNEUMOTHORAX, BACTERIOLOGICAL OR HISTO	IMMUNOLOGY	X	X	X	X
01172	TUBERCULOUS PNEUMOTHORAX, BACTERIOLOGICAL OR HISTO	IMMUNOLOGY	X	X	X	X
01173	TUBERCULOUS PNEUMOTHORAX, TUBERCLE BACILLI FOUND (	IMMUNOLOGY	X	X	X	X
01174	TUBERCULOUS PNEUMOTHORAX, TUBERCLE BACILLI NOT FOU	IMMUNOLOGY	X	X	X	X
01175	TUBERCULOUS PNEUMOTHORAX, TUBERCLE BACILLI NOT FOU	IMMUNOLOGY	X	X	X	X
01176	TUBERCULOUS PNEUMOTHORAX, TUBERCLE BACILLI NOT FOU	IMMUNOLOGY	X	X	X	X
01180	OTHER SPECIFIED PULMONARY TUBERCULOSIS, UNSPECIFIE	IMMUNOLOGY	X	X	X	X
01181	OTHER SPECIFIED PULMONARY TUBERCULOSIS, BACTERIOLO	IMMUNOLOGY	X	X	X	X
01182	OTHER SPECIFIED PULMONARY TUBERCULOSIS, BACTERIOLO	IMMUNOLOGY	X	X	X	X
01183	OTHER SPECIFIED PULMONARY TUBERCULOSIS, TUBERCLE B	IMMUNOLOGY	X	X	X	X
01184	OTHER SPECIFIED PULMONARY TUBERCULOSIS, TUBERCLE B	IMMUNOLOGY	X	X	X	X
01185	OTHER SPECIFIED PULMONARY TUBERCULOSIS, TUBERCLE B	IMMUNOLOGY	X	X	X	X
01186	OTHER SPECIFIED PULMONARY TUBERCULOSIS, TUBERCLE B	IMMUNOLOGY	X	X	X	X
01190	UNSPECIFIED PULMONARY TUBERCULOSIS, UNSPECIFIED EX	IMMUNOLOGY	X	X	X	X
01191	UNSPECIFIED PULMONARY TUBERCULOSIS, BACTERIOLOGICA	IMMUNOLOGY	X	X	X	X
01192	UNSPECIFIED PULMONARY TUBERCULOSIS, BACTERIOLOGICA	IMMUNOLOGY	X	X	X	X
01193	UNSPECIFIED PULMONARY TUBERCULOSIS, TUBERCLE BACIL	IMMUNOLOGY	X	X	X	X
01194	UNSPECIFIED PULMONARY TUBERCULOSIS, TUBERCLE BACIL	IMMUNOLOGY	X	X	X	X
01195	UNSPECIFIED PULMONARY TUBERCULOSIS, TUBERCLE BACIL	IMMUNOLOGY	X	X	X	X
01196	UNSPECIFIED PULMONARY TUBERCULOSIS, TUBERCLE BACIL	IMMUNOLOGY	X	X	X	X
01200	TUBERCULOUS PLEURISY, UNSPECIFIED EXAMINATION	IMMUNOLOGY	X	X	X	X
01201	TUBERCULOUS PLEURISY, BACTERIOLOGICAL OR HISTOLOGI	IMMUNOLOGY	X	X	X	X
01202	TUBERCULOUS PLEURISY, BACTERIOLOGICAL OR HISTOLOGI	IMMUNOLOGY	X	X	X	X
01203	TUBERCULOUS PLEURISY, TUBERCLE BACILLI FOUND (IN S	IMMUNOLOGY	X	X	X	X
01204	TUBERCULOUS PLEURISY, TUBERCLE BACILLI NOT FOUND (	IMMUNOLOGY	X	X	X	X
01205	TUBERCULOUS PLEURISY, TUBERCLE BACILLI NOT FOUND B	IMMUNOLOGY	X	X	X	X
01206	TUBERCULOUS PLEURISY, TUBERCLE BACILLI NOT FOUND B	IMMUNOLOGY	X	X	X	X
01210	TUBERCULOSIS OF INTRATHORACIC LYMPH NODES, UNSPECI	IMMUNOLOGY	X	X	X	X
01211	TUBERCULOSIS OF INTRATHORACIC LYMPH NODES, BACTERI	IMMUNOLOGY	X	X	X	X
01212	TUBERCULOSIS OF INTRATHORACIC LYMPH NODES, BACTERI	IMMUNOLOGY	X	X	X	X
01213	TUBERCULOSIS OF INTRATHORACIC LYMPH NODES, TUBERCL	IMMUNOLOGY	X	X	X	X
01214	TUBERCULOSIS OF INTRATHORACIC LYMPH NODES, TUBERCL	IMMUNOLOGY	X	X	X	X
01215	TUBERCULOSIS OF INTRATHORACIC LYMPH NODES, TUBERCL	IMMUNOLOGY	X	X	X	X
01216	TUBERCULOSIS OF INTRATHORACIC LYMPH NODES, TUBERCL	IMMUNOLOGY	X	X	X	X
01220	ISOLATED TRACHEAL OR BRONCHIAL TUBERCULOSIS, UNSPE	IMMUNOLOGY	X	X	X	X
01221	ISOLATED TRACHEAL OR BRONCHIAL TUBERCULOSIS, BACTE	IMMUNOLOGY	X	X	X	X
01222	ISOLATED TRACHEAL OR BRONCHIAL TUBERCULOSIS, BACTE	IMMUNOLOGY	X	X	X	X
01223	ISOLATED TRACHEAL OR BRONCHIAL TUBERCULOSIS, TUBER	IMMUNOLOGY	X	X	X	X
01224	ISOLATED TRACHEAL OR BRONCHIAL TUBERCULOSIS, TUBER	IMMUNOLOGY	X	X	X	X
01225	ISOLATED TRACHEAL OR BRONCHIAL TUBERCULOSIS, TUBER	IMMUNOLOGY	X	X	X	X
01226	ISOLATED TRACHEAL OR BRONCHIAL TUBERCULOSIS, TUBER	IMMUNOLOGY	X	X	X	X
01230	TUBERCULOUS LARYNGITIS, UNSPECIFIED EXAMINATION	IMMUNOLOGY	X	X	X	X
01231	TUBERCULOUS LARYNGITIS, BACTERIOLOGICAL OR HISTOLO	IMMUNOLOGY	X	X	X	X
01232	TUBERCULOUS LARYNGITIS, BACTERIOLOGICAL OR HISTOLO	IMMUNOLOGY	X	X	X	X
01233	TUBERCULOUS LARYNGITIS, TUBERCLE BACILLI FOUND (IN	IMMUNOLOGY	X	X	X	X
01234	TUBERCULOUS LARYNGITIS, TUBERCLE BACILLI NOT FOUND	IMMUNOLOGY	X	X	X	X
01235	TUBERCULOUS LARYNGITIS, TUBERCLE BACILLI NOT FOUND	IMMUNOLOGY	X	X	X	X
01236	TUBERCULOUS LARYNGITIS, TUBERCLE BACILLI NOT FOUND	IMMUNOLOGY	X	X	X	X
01280	OTHER SPECIFIED RESPIRATORY TUBERCULOSIS, UNSPECIF	IMMUNOLOGY	X	X	X	X
01281	OTHER SPECIFIED RESPIRATORY TUBERCULOSIS, BACTERIO	IMMUNOLOGY	X	X	X	X
01282	OTHER SPECIFIED RESPIRATORY TUBERCULOSIS, BACTERIO	IMMUNOLOGY	X	X	X	X
01283	OTHER SPECIFIED RESPIRATORY TUBERCULOSIS, TUBERCLE	IMMUNOLOGY	X	X	X	X
01284	OTHER SPECIFIED RESPIRATORY TUBERCULOSIS, TUBERCLE	IMMUNOLOGY	X	X	X	X
01285	OTHER SPECIFIED RESPIRATORY TUBERCULOSIS, TUBERCLE	IMMUNOLOGY	X	X	X	X
01286	OTHER SPECIFIED RESPIRATORY TUBERCULOSIS, TUBERCLE	IMMUNOLOGY	X	X	X	X
01300	TUBERCULOUS MENINGITIS, UNSPECIFIED EXAMINATION	IMMUNOLOGY	X	X	X	X
01301	TUBERCULOUS MENINGITIS, BACTERIOLOGICAL OR HISTOLO	IMMUNOLOGY	X	X	X	X
01302	TUBERCULOUS MENINGITIS, BACTERIOLOGICAL OR HISTOLO	IMMUNOLOGY	X	X	X	X
01303	TUBERCULOUS MENINGITIS, TUBERCLE BACILLI FOUND (IN	IMMUNOLOGY	X	X	X	X
01304	TUBERCULOUS MENINGITIS, TUBERCLE BACILLI NOT FOUND	IMMUNOLOGY	X	X	X	X
01305	TUBERCULOUS MENINGITIS, TUBERCLE BACILLI NOT FOUND	IMMUNOLOGY	X	X	X	X
01306	TUBERCULOUS MENINGITIS, TUBERCLE BACILLI NOT FOUND	IMMUNOLOGY	X	X	X	X
01310	TUBERCULOMA OF MENINGES, UNSPECIFIED EXAMINATION	IMMUNOLOGY	X	X	X	X
01311	TUBERCULOMA OF MENINGES, BACTERIOLOGICAL OR HISTOL	IMMUNOLOGY	X	X	X	X
01312	TUBERCULOMA OF MENINGES, BACTERIOLOGICAL OR HISTOL	IMMUNOLOGY	X	X	X	X
01313	TUBERCULOMA OF MENINGES, TUBERCLE BACILLI FOUND (I	IMMUNOLOGY	X	X	X	X
01314	TUBERCULOMA OF MENINGES, TUBERCLE BACILLI NOT FOUN	IMMUNOLOGY	X	X	X	X
01315	TUBERCULOMA OF MENINGES, TUBERCLE BACILLI NOT FOUN	IMMUNOLOGY	X	X	X	X
01316	TUBERCULOMA OF MENINGES, TUBERCLE BACILLI NOT FOUN	IMMUNOLOGY	X	X	X	X
01320	TUBERCULOMA OF BRAIN, UNSPECIFIED EXAMINATION	IMMUNOLOGY	X	X	X	X
01321	TUBERCULOMA OF BRAIN, BACTERIOLOGICAL OR HISTOLOGI	IMMUNOLOGY	X	X	X	X
01322	TUBERCULOMA OF BRAIN, BACTERIOLOGICAL OR HISTOLOGI	IMMUNOLOGY	X	X	X	X
01323	TUBERCULOMA OF BRAIN, TUBERCLE BACILLI FOUND (IN S	IMMUNOLOGY	X	X	X	X
01324	TUBERCULOMA OF BRAIN, TUBERCLE BACILLI NOT FOUND (	IMMUNOLOGY	X	X	X	X
01325	TUBERCULOMA OF BRAIN, TUBERCLE BACILLI NOT FOUND B	IMMUNOLOGY	X	X	X	X
01326	TUBERCULOMA OF BRAIN, TUBERCLE BACILLI NOT FOUND B	IMMUNOLOGY	X	X	X	X
01330	TUBERCULOUS ABSCESS OF BRAIN, UNSPECIFIED EXAMINAT	IMMUNOLOGY	X	X	X	X
01331	TUBERCULOUS ABSCESS OF BRAIN, BACTERIOLOGICAL OR H	IMMUNOLOGY	X	X	X	X
01332	TUBERCULOUS ABSCESS OF BRAIN, BACTERIOLOGICAL OR H	IMMUNOLOGY	X	X	X	X
01333	TUBERCULOUS ABSCESS OF BRAIN, TUBERCLE BACILLI FOU	IMMUNOLOGY	X	X	X	X
01334	TUBERCULOUS ABSCESS OF BRAIN, TUBERCLE BACILLI NOT	IMMUNOLOGY	X	X	X	X
01335	TUBERCULOUS ABSCESS OF BRAIN, TUBERCLE BACILLI NOT	IMMUNOLOGY	X	X	X	X
01336	TUBERCULOUS ABSCESS OF BRAIN, TUBERCLE BACILLI NOT	IMMUNOLOGY	X	X	X	X
01340	TUBERCULOMA OF SPINAL CORD, UNSPECIFIED EXAMINATIO	IMMUNOLOGY	X	X	X	X
01341	TUBERCULOMA OF SPINAL CORD, BACTERIOLOGICAL OR HIS	IMMUNOLOGY	X	X	X	X
01342	TUBERCULOMA OF SPINAL CORD, BACTERIOLOGICAL OR HIS	IMMUNOLOGY	X	X	X	X
01343	TUBERCULOMA OF SPINAL CORD, TUBERCLE BACILLI FOUND	IMMUNOLOGY	X	X	X	X
01344	TUBERCULOMA OF SPINAL CORD, TUBERCLE BACILLI NOT F	IMMUNOLOGY	X	X	X	X
01345	TUBERCULOMA OF SPINAL CORD, TUBERCLE BACILLI NOT F	IMMUNOLOGY	X	X	X	X
01346	TUBERCULOMA OF SPINAL CORD, TUBERCLE BACILLI NOT F	IMMUNOLOGY	X	X	X	X
01350	TUBERCULOUS ABSCESS OF SPINAL CORD, UNSPECIFIED EX	IMMUNOLOGY	X	X	X	X
01351	TUBERCULOUS ABSCESS OF SPINAL CORD, BACTERIOLOGICA	IMMUNOLOGY	X	X	X	X
01352	TUBERCULOUS ABSCESS OF SPINAL CORD, BACTERIOLOGICA	IMMUNOLOGY	X	X	X	X
01353	TUBERCULOUS ABSCESS OF SPINAL CORD, TUBERCLE BACIL	IMMUNOLOGY	X	X	X	X
01354	TUBERCULOUS ABSCESS OF SPINAL CORD, TUBERCLE BACIL	IMMUNOLOGY	X	X	X	X
01355	TUBERCULOUS ABSCESS OF SPINAL CORD, TUBERCLE BACIL	IMMUNOLOGY	X	X	X	X
01356	TUBERCULOUS ABSCESS OF SPINAL CORD, TUBERCLE BACIL	IMMUNOLOGY	X	X	X	X
01360	TUBERCULOUS ENCEPHALITIS OR MYELITIS, UNSPECIFIED	IMMUNOLOGY	X	X	X	X
01361	TUBERCULOUS ENCEPHALITIS OR MYELITIS, BACTERIOLOGI	IMMUNOLOGY	X	X	X	X
01362	TUBERCULOUS ENCEPHALITIS OR MYELITIS, BACTERIOLOGI	IMMUNOLOGY	X	X	X	X
01363	TUBERCULOUS ENCEPHALITIS OR MYELITIS, TUBERCLE BAC	IMMUNOLOGY	X	X	X	X
01364	TUBERCULOUS ENCEPHALITIS OR MYELITIS, TUBERCLE BAC	IMMUNOLOGY	X	X	X	X
01365	TUBERCULOUS ENCEPHALITIS OR MYELITIS, TUBERCLE BAC	IMMUNOLOGY	X	X	X	X
01366	TUBERCULOUS ENCEPHALITIS OR MYELITIS, TUBERCLE BAC	IMMUNOLOGY	X	X	X	X
01380	OTHER SPECIFIED TUBERCULOSIS OF CENTRAL NERVOUS SY	IMMUNOLOGY	X	X	X	X
01381	OTHER SPECIFIED TUBERCULOSIS OF CENTRAL NERVOUS SY	IMMUNOLOGY	X	X	X	X
01382	OTHER SPECIFIED TUBERCULOSIS OF CENTRAL NERVOUS SY	IMMUNOLOGY	X	X	X	X
01383	OTHER SPECIFIED TUBERCULOSIS OF CENTRAL NERVOUS SY	IMMUNOLOGY	X	X	X	X
01384	OTHER SPECIFIED TUBERCULOSIS OF CENTRAL NERVOUS SY	IMMUNOLOGY	X	X	X	X
01385	OTHER SPECIFIED TUBERCULOSIS OF CENTRAL NERVOUS SY	IMMUNOLOGY	X	X	X	X
01386	OTHER SPECIFIED TUBERCULOSIS OF CENTRAL NERVOUS SY	IMMUNOLOGY	X	X	X	X
01390	UNSPECIFIED TUBERCULOSIS OF CENTRAL NERVOUS SYSTEM	IMMUNOLOGY	X	X	X	X
01391	UNSPECIFIED TUBERCULOSIS OF CENTRAL NERVOUS SYSTEM	IMMUNOLOGY	X	X	X	X
01392	UNSPECIFIED TUBERCULOSIS OF CENTRAL NERVOUS SYSTEM	IMMUNOLOGY	X	X	X	X
01393	UNSPECIFIED TUBERCULOSIS OF CENTRAL NERVOUS SYSTEM	IMMUNOLOGY	X	X	X	X
01394	UNSPECIFIED TUBERCULOSIS OF CENTRAL NERVOUS SYSTEM	IMMUNOLOGY	X	X	X	X
01395	UNSPECIFIED TUBERCULOSIS OF CENTRAL NERVOUS SYSTEM	IMMUNOLOGY	X	X	X	X
01396	UNSPECIFIED TUBERCULOSIS OF CENTRAL NERVOUS SYSTEM	IMMUNOLOGY	X	X	X	X
01400	TUBERCULOUS PERITONITIS, UNSPECIFIED EXAMINATION	IMMUNOLOGY	X	X	X	X
01401	TUBERCULOUS PERITONITIS, BACTERIOLOGICAL OR HISTOL	IMMUNOLOGY	X	X	X	X
01402	TUBERCULOUS PERITONITIS, BACTERIOLOGICAL OR HISTOL	IMMUNOLOGY	X	X	X	X
01403	TUBERCULOUS PERITONITIS, TUBERCLE BACILLI FOUND (I	IMMUNOLOGY	X	X	X	X
01404	TUBERCULOUS PERITONITIS, TUBERCLE BACILLI NOT FOUN	IMMUNOLOGY	X	X	X	X
01405	TUBERCULOUS PERITONITIS, TUBERCLE BACILLI NOT FOUN	IMMUNOLOGY	X	X	X	X
01406	TUBERCULOUS PERITONITIS, TUBERCLE BACILLI NOT FOUN	IMMUNOLOGY	X	X	X	X
01480	TUBERCULOSIS OF INTESTINES AND MESENTERIC GLANDS,	IMMUNOLOGY	X	X	X	X
01481	TUBERCULOSIS OF INTESTINES AND MESENTERIC GLANDS,	IMMUNOLOGY	X	X	X	X
01482	TUBERCULOSIS OF INTESTINES AND MESENTERIC GLANDS,	IMMUNOLOGY	X	X	X	X
01483	TUBERCULOSIS OF INTESTINES AND MESENTERIC GLANDS,	IMMUNOLOGY	X	X	X	X
01484	TUBERCULOSIS OF INTESTINES AND MESENTERIC GLANDS,	IMMUNOLOGY	X	X	X	X
01485	TUBERCULOSIS OF INTESTINES AND MESENTERIC GLANDS,	IMMUNOLOGY	X	X	X	X
01486	TUBERCULOSIS OF INTESTINES AND MESENTERIC GLANDS,	IMMUNOLOGY	X	X	X	X
01500	TUBERCULOSIS OF VERTEBRAL COLUMN, UNSPECIFIED EXAM	IMMUNOLOGY	X	X	X	X
01501	TUBERCULOSIS OF VERTEBRAL COLUMN, BACTERIOLOGICAL	IMMUNOLOGY	X	X	X	X
01502	TUBERCULOSIS OF VERTEBRAL COLUMN, BACTERIOLOGICAL	IMMUNOLOGY	X	X	X	X
01503	TUBERCULOSIS OF VERTEBRAL COLUMN, TUBERCLE BACILLI	IMMUNOLOGY	X	X	X	X
01504	TUBERCULOSIS OF VERTEBRAL COLUMN, TUBERCLE BACILLI	IMMUNOLOGY	X	X	X	X
01505	TUBERCULOSIS OF VERTEBRAL COLUMN, TUBERCLE BACILLI	IMMUNOLOGY	X	X	X	X
01506	TUBERCULOSIS OF VERTEBRAL COLUMN, TUBERCLE BACILLI	IMMUNOLOGY	X	X	X	X
01510	TUBERCULOSIS OF HIP, UNSPECIFIED EXAMINATION	IMMUNOLOGY	X	X	X	X
01511	TUBERCULOSIS OF HIP, BACTERIOLOGICAL OR HISTOLOGIC	IMMUNOLOGY	X	X	X	X
01512	TUBERCULOSIS OF HIP, BACTERIOLOGICAL OR HISTOLOGIC	IMMUNOLOGY	X	X	X	X
01513	TUBERCULOSIS OF HIP, TUBERCLE BACILLI FOUND (IN SP	IMMUNOLOGY	X	X	X	X
01514	TUBERCULOSIS OF HIP, TUBERCLE BACILLI NOT FOUND (I	IMMUNOLOGY	X	X	X	X
01515	TUBERCULOSIS OF HIP, TUBERCLE BACILLI NOT FOUND BY	IMMUNOLOGY	X	X	X	X
01516	TUBERCULOSIS OF HIP, TUBERCLE BACILLI NOT FOUND BY	IMMUNOLOGY	X	X	X	X
01520	TUBERCULOSIS OF KNEE, UNSPECIFIED EXAMINATION	IMMUNOLOGY	X	X	X	X
01521	TUBERCULOSIS OF KNEE, BACTERIOLOGICAL OR HISTOLOGI	IMMUNOLOGY	X	X	X	X
01522	TUBERCULOSIS OF KNEE, BACTERIOLOGICAL OR HISTOLOGI	IMMUNOLOGY	X	X	X	X
01523	TUBERCULOSIS OF KNEE, TUBERCLE BACILLI FOUND (IN S	IMMUNOLOGY	X	X	X	X
01524	TUBERCULOSIS OF KNEE, TUBERCLE BACILLI NOT FOUND (	IMMUNOLOGY	X	X	X	X
01525	TUBERCULOSIS OF KNEE, TUBERCLE BACILLI NOT FOUND B	IMMUNOLOGY	X	X	X	X
01526	TUBERCULOSIS OF KNEE, TUBERCLE BACILLI NOT FOUND B	IMMUNOLOGY	X	X	X	X
01550	TUBERCULOSIS OF LIMB BONES, UNSPECIFIED EXAMINATIO	IMMUNOLOGY	X	X	X	X
01551	TUBERCULOSIS OF LIMB BONES, BACTERIOLOGICAL OR HIS	IMMUNOLOGY	X	X	X	X
01552	TUBERCULOSIS OF LIMB BONES, BACTERIOLOGICAL OR HIS	IMMUNOLOGY	X	X	X	X
01553	TUBERCULOSIS OF LIMB BONES, TUBERCLE BACILLI FOUND	IMMUNOLOGY	X	X	X	X
01554	TUBERCULOSIS OF LIMB BONES, TUBERCLE BACILLI NOT F	IMMUNOLOGY	X	X	X	X
01555	TUBERCULOSIS OF LIMB BONES, TUBERCLE BACILLI NOT F	IMMUNOLOGY	X	X	X	X
01556	TUBERCULOSIS OF LIMB BONES, TUBERCLE BACILLI NOT F	IMMUNOLOGY	X	X	X	X
01560	TUBERCULOSIS OF MASTOID, UNSPECIFIED EXAMINATION	IMMUNOLOGY	X	X	X	X
01561	TUBERCULOSIS OF MASTOID, BACTERIOLOGICAL OR HISTOL	IMMUNOLOGY	X	X	X	X
01562	TUBERCULOSIS OF MASTOID, BACTERIOLOGICAL OR HISTOL	IMMUNOLOGY	X	X	X	X
01563	TUBERCULOSIS OF MASTOID, TUBERCLE BACILLI FOUND (I	IMMUNOLOGY	X	X	X	X
01564	TUBERCULOSIS OF MASTOID, TUBERCLE BACILLI NOT FOUN	IMMUNOLOGY	X	X	X	X
01565	TUBERCULOSIS OF MASTOID, TUBERCLE BACILLI NOT FOUN	IMMUNOLOGY	X	X	X	X
01566	TUBERCULOSIS OF MASTOID, TUBERCLE BACILLI NOT FOUN	IMMUNOLOGY	X	X	X	X
01570	TUBERCULOSIS OF OTHER SPECIFIED BONE, UNSPECIFIED	IMMUNOLOGY	X	X	X	X
01571	TUBERCULOSIS OF OTHER SPECIFIED BONE, BACTERIOLOGI	IMMUNOLOGY	X	X	X	X
01572	TUBERCULOSIS OF OTHER SPECIFIED BONE, BACTERIOLOGI	IMMUNOLOGY	X	X	X	X
01573	TUBERCULOSIS OF OTHER SPECIFIED BONE, TUBERCLE BAC	IMMUNOLOGY	X	X	X	X
01574	TUBERCULOSIS OF OTHER SPECIFIED BONE, TUBERCLE BAC	IMMUNOLOGY	X	X	X	X
01575	TUBERCULOSIS OF OTHER SPECIFIED BONE, TUBERCLE BAC	IMMUNOLOGY	X	X	X	X
01576	TUBERCULOSIS OF OTHER SPECIFIED BONE, TUBERCLE BAC	IMMUNOLOGY	X	X	X	X
01580	TUBERCULOSIS OF OTHER SPECIFIED JOINT, UNSPECIFIED	IMMUNOLOGY	X	X	X	X
01581	TUBERCULOSIS OF OTHER SPECIFIED JOINT, BACTERIOLOG	IMMUNOLOGY	X	X	X	X
01582	TUBERCULOSIS OF OTHER SPECIFIED JOINT, BACTERIOLOG	IMMUNOLOGY	X	X	X	X
01583	TUBERCULOSIS OF OTHER SPECIFIED JOINT, TUBERCLE BA	IMMUNOLOGY	X	X	X	X
01584	TUBERCULOSIS OF OTHER SPECIFIED JOINT, TUBERCLE BA	IMMUNOLOGY	X	X	X	X
01585	TUBERCULOSIS OF OTHER SPECIFIED JOINT, TUBERCLE BA	IMMUNOLOGY	X	X	X	X
01586	TUBERCULOSIS OF OTHER SPECIFIED JOINT, TUBERCLE BA	IMMUNOLOGY	X	X	X	X
01590	TUBERCULOSIS OF UNSPECIFIED BONES AND JOINTS, UNSP	IMMUNOLOGY	X	X	X	X
01591	TUBERCULOSIS OF UNSPECIFIED BONES AND JOINTS, BACT	IMMUNOLOGY	X	X	X	X
01592	TUBERCULOSIS OF UNSPECIFIED BONES AND JOINTS, BACT	IMMUNOLOGY	X	X	X	X
01593	TUBERCULOSIS OF UNSPECIFIED BONES AND JOINTS, TUBE	IMMUNOLOGY	X	X	X	X
01594	TUBERCULOSIS OF UNSPECIFIED BONES AND JOINTS, TUBE	IMMUNOLOGY	X	X	X	X
01595	TUBERCULOSIS OF UNSPECIFIED BONES AND JOINTS, TUBE	IMMUNOLOGY	X	X	X	X
01596	TUBERCULOSIS OF UNSPECIFIED BONES AND JOINTS, TUBE	IMMUNOLOGY	X	X	X	X
01600	TUBERCULOSIS OF KIDNEY, UNSPECIFIED EXAMINATION	IMMUNOLOGY	X	X	X	X
01601	TUBERCULOSIS OF KIDNEY, BACTERIOLOGICAL OR HISTOLO	IMMUNOLOGY	X	X	X	X
01602	TUBERCULOSIS OF KIDNEY, BACTERIOLOGICAL OR HISTOLO	IMMUNOLOGY	X	X	X	X
01603	TUBERCULOSIS OF KIDNEY, TUBERCLE BACILLI FOUND (IN	IMMUNOLOGY	X	X	X	X
01604	TUBERCULOSIS OF KIDNEY, TUBERCLE BACILLI NOT FOUND	IMMUNOLOGY	X	X	X	X
01605	TUBERCULOSIS OF KIDNEY, TUBERCLE BACILLI NOT FOUND	IMMUNOLOGY	X	X	X	X
01606	TUBERCULOSIS OF KIDNEY, TUBERCLE BACILLI NOT FOUND	IMMUNOLOGY	X	X	X	X
01610	TUBERCULOSIS OF BLADDER, UNSPECIFIED EXAMINATION	IMMUNOLOGY	X	X	X	X
01611	TUBERCULOSIS OF BLADDER, BACTERIOLOGICAL OR HISTOL	IMMUNOLOGY	X	X	X	X
01612	TUBERCULOSIS OF BLADDER, BACTERIOLOGICAL OR HISTOL	IMMUNOLOGY	X	X	X	X
01613	TUBERCULOSIS OF BLADDER, TUBERCLE BACILLI FOUND (I	IMMUNOLOGY	X	X	X	X
01614	TUBERCULOSIS OF BLADDER, TUBERCLE BACILLI NOT FOUN	IMMUNOLOGY	X	X	X	X
01615	TUBERCULOSIS OF BLADDER, TUBERCLE BACILLI NOT FOUN	IMMUNOLOGY	X	X	X	X
01616	TUBERCULOSIS OF BLADDER, TUBERCLE BACILLI NOT FOUN	IMMUNOLOGY	X	X	X	X
01620	TUBERCULOSIS OF URETER, UNSPECIFIED EXAMINATION	IMMUNOLOGY	X	X	X	X
01621	TUBERCULOSIS OF URETER, BACTERIOLOGICAL OR HISTOLO	IMMUNOLOGY	X	X	X	X
01622	TUBERCULOSIS OF URETER, BACTERIOLOGICAL OR HISTOLO	IMMUNOLOGY	X	X	X	X
01623	TUBERCULOSIS OF URETER, TUBERCLE BACILLI FOUND (IN	IMMUNOLOGY	X	X	X	X
01624	TUBERCULOSIS OF URETER, TUBERCLE BACILLI NOT FOUND	IMMUNOLOGY	X	X	X	X
01625	TUBERCULOSIS OF URETER, TUBERCLE BACILLI NOT FOUND	IMMUNOLOGY	X	X	X	X
01626	TUBERCULOSIS OF URETER, TUBERCLE BACILLI NOT FOUND	IMMUNOLOGY	X	X	X	X
01630	TUBERCULOSIS OF OTHER URINARY ORGANS, UNSPECIFIED	IMMUNOLOGY	X	X	X	X
01631	TUBERCULOSIS OF OTHER URINARY ORGANS, BACTERIOLOGI	IMMUNOLOGY	X	X	X	X
01632	TUBERCULOSIS OF OTHER URINARY ORGANS, BACTERIOLOGI	IMMUNOLOGY	X	X	X	X
01633	TUBERCULOSIS OF OTHER URINARY ORGANS, TUBERCLE BAC	IMMUNOLOGY	X	X	X	X
01634	TUBERCULOSIS OF OTHER URINARY ORGANS, TUBERCLE BAC	IMMUNOLOGY	X	X	X	X
01635	TUBERCULOSIS OF OTHER URINARY ORGANS, TUBERCLE BAC	IMMUNOLOGY	X	X	X	X
01636	TUBERCULOSIS OF OTHER URINARY ORGANS, TUBERCLE BAC	IMMUNOLOGY	X	X	X	X
01640	TUBERCULOSIS OF EPIDIDYMIS, UNSPECIFIED EXAMINATIO	IMMUNOLOGY	X	X	X	X
01641	TUBERCULOSIS OF EPIDIDYMIS, BACTERIOLOGICAL OR HIS	IMMUNOLOGY	X	X	X	X
01642	TUBERCULOSIS OF EPIDIDYMIS, BACTERIOLOGICAL OR HIS	IMMUNOLOGY	X	X	X	X
01643	TUBERCULOSIS OF EPIDIDYMIS, TUBERCLE BACILLI FOUND	IMMUNOLOGY	X	X	X	X
01644	TUBERCULOSIS OF EPIDIDYMIS, TUBERCLE BACILLI NOT F	IMMUNOLOGY	X	X	X	X
01645	TUBERCULOSIS OF EPIDIDYMIS, TUBERCLE BACILLI NOT F	IMMUNOLOGY	X	X	X	X
01646	TUBERCULOSIS OF EPIDIDYMIS, TUBERCLE BACILLI NOT F	IMMUNOLOGY	X	X	X	X
01650	TUBERCULOSIS OF OTHER MALE GENITAL ORGANS, UNSPECI	IMMUNOLOGY	X	X	X	X
01651	TUBERCULOSIS OF OTHER MALE GENITAL ORGANS, BACTERI	IMMUNOLOGY	X	X	X	X
01652	TUBERCULOSIS OF OTHER MALE GENITAL ORGANS, BACTERI	IMMUNOLOGY	X	X	X	X
01653	TUBERCULOSIS OF OTHER MALE GENITAL ORGANS, TUBERCL	IMMUNOLOGY	X	X	X	X
01654	TUBERCULOSIS OF OTHER MALE GENITAL ORGANS, TUBERCL	IMMUNOLOGY	X	X	X	X
01655	TUBERCULOSIS OF OTHER MALE GENITAL ORGANS, TUBERCL	IMMUNOLOGY	X	X	X	X
01656	TUBERCULOSIS OF OTHER MALE GENITAL ORGANS, TUBERCL	IMMUNOLOGY	X	X	X	X
01660	TUBERCULOUS OOPHORITIS AND SALPINGITIS, UNSPECIFIE	IMMUNOLOGY	X	X	X	X
01661	TUBERCULOUS OOPHORITIS AND SALPINGITIS, BACTERIOLO	IMMUNOLOGY	X	X	X	X
01662	TUBERCULOUS OOPHORITIS AND SALPINGITIS, BACTERIOLO	IMMUNOLOGY	X	X	X	X
01663	TUBERCULOUS OOPHORITIS AND SALPINGITIS, TUBERCLE B	IMMUNOLOGY	X	X	X	X
01664	TUBERCULOUS OOPHORITIS AND SALPINGITIS, TUBERCLE B	IMMUNOLOGY	X	X	X	X
01665	TUBERCULOUS OOPHORITIS AND SALPINGITIS, TUBERCLE B	IMMUNOLOGY	X	X	X	X
01666	TUBERCULOUS OOPHORITIS AND SALPINGITIS, TUBERCLE B	IMMUNOLOGY	X	X	X	X
01670	TUBERCULOSIS OF OTHER FEMALE GENITAL ORGANS, UNSPE	IMMUNOLOGY	X	X	X	X
01671	TUBERCULOSIS OF OTHER FEMALE GENITAL ORGANS, BACTE	IMMUNOLOGY	X	X	X	X
01672	TUBERCULOSIS OF OTHER FEMALE GENITAL ORGANS, BACTE	IMMUNOLOGY	X	X	X	X
01673	TUBERCULOSIS OF OTHER FEMALE GENITAL ORGANS, TUBER	IMMUNOLOGY	X	X	X	X
01674	TUBERCULOSIS OF OTHER FEMALE GENITAL ORGANS, TUBER	IMMUNOLOGY	X	X	X	X
01675	TUBERCULOSIS OF OTHER FEMALE GENITAL ORGANS, TUBER	IMMUNOLOGY	X	X	X	X
01676	TUBERCULOSIS OF OTHER FEMALE GENITAL ORGANS, TUBER	IMMUNOLOGY	X	X	X	X
01690	UNSPECIFIED GENITOURINARY TUBERCULOSIS, UNSPECIFIE	IMMUNOLOGY	X	X	X	X
01691	UNSPECIFIED GENITOURINARY TUBERCULOSIS, BACTERIOLO	IMMUNOLOGY	X	X	X	X
01692	UNSPECIFIED GENITOURINARY TUBERCULOSIS, BACTERIOLO	IMMUNOLOGY	X	X	X	X
01693	UNSPECIFIED GENITOURINARY TUBERCULOSIS, TUBERCLE B	IMMUNOLOGY	X	X	X	X
01694	UNSPECIFIED GENITOURINARY TUBERCULOSIS, TUBERCLE B	IMMUNOLOGY	X	X	X	X
01695	UNSPECIFIED GENITOURINARY TUBERCULOSIS, TUBERCLE B	IMMUNOLOGY	X	X	X	X
01696	UNSPECIFIED GENITOURINARY TUBERCULOSIS, TUBERCLE B	IMMUNOLOGY	X	X	X	X
01700	TUBERCULOSIS OF SKIN AND SUBCUTANEOUS CELLULAR TIS	IMMUNOLOGY	X	X	X	X
01701	TUBERCULOSIS OF SKIN AND SUBCUTANEOUS CELLULAR TIS	IMMUNOLOGY	X	X	X	X
01702	TUBERCULOSIS OF SKIN AND SUBCUTANEOUS CELLULAR TIS	IMMUNOLOGY	X	X	X	X
01703	TUBERCULOSIS OF SKIN AND SUBCUTANEOUS CELLULAR TIS	IMMUNOLOGY	X	X	X	X
01704	TUBERCULOSIS OF SKIN AND SUBCUTANEOUS CELLULAR TIS	IMMUNOLOGY	X	X	X	X
01705	TUBERCULOSIS OF SKIN AND SUBCUTANEOUS CELLULAR TIS	IMMUNOLOGY	X	X	X	X
01706	TUBERCULOSIS OF SKIN AND SUBCUTANEOUS CELLULAR TIS	IMMUNOLOGY	X	X	X	X
01710	ERYTHEMA NODOSUM WITH HYPERSENSITIVITY REACTION IN	IMMUNOLOGY	X	X	X	X
01711	ERYTHEMA NODOSUM WITH HYPERSENSITIVITY REACTION IN	IMMUNOLOGY	X	X	X	X
01712	ERYTHEMA NODOSUM WITH HYPERSENSITIVITY REACTION IN	IMMUNOLOGY	X	X	X	X
01713	ERYTHEMA NODOSUM WITH HYPERSENSITIVITY REACTION IN	IMMUNOLOGY	X	X	X	X
01714	ERYTHEMA NODOSUM WITH HYPERSENSITIVITY REACTION IN	IMMUNOLOGY	X	X	X	X
01715	ERYTHEMA NODOSUM WITH HYPERSENSITIVITY REACTION IN	IMMUNOLOGY	X	X	X	X
01716	ERYTHEMA NODOSUM WITH HYPERSENSITIVITY REACTION IN	IMMUNOLOGY	X	X	X	X
01720	TUBERCULOSIS OF PERIPHERAL LYMPH NODES, UNSPECIFIE	IMMUNOLOGY	X	X	X	X
01721	TUBERCULOSIS OF PERIPHERAL LYMPH NODES, BACTERIOLO	IMMUNOLOGY	X	X	X	X
01722	TUBERCULOSIS OF PERIPHERAL LYMPH NODES, BACTERIOLO	IMMUNOLOGY	X	X	X	X
01723	TUBERCULOSIS OF PERIPHERAL LYMPH NODES, TUBERCLE B	IMMUNOLOGY	X	X	X	X
01724	TUBERCULOSIS OF PERIPHERAL LYMPH NODES, TUBERCLE B	IMMUNOLOGY	X	X	X	X
01725	TUBERCULOSIS OF PERIPHERAL LYMPH NODES, TUBERCLE B	IMMUNOLOGY	X	X	X	X
01726	TUBERCULOSIS OF PERIPHERAL LYMPH NODES, TUBERCLE B	IMMUNOLOGY	X	X	X	X
01730	TUBERCULOSIS OF EYE, UNSPECIFIED EXAMINATION	IMMUNOLOGY	X	X	X	X
01731	TUBERCULOSIS OF EYE, BACTERIOLOGICAL OR HISTOLOGIC	IMMUNOLOGY	X	X	X	X
01732	TUBERCULOSIS OF EYE, BACTERIOLOGICAL OR HISTOLOGIC	IMMUNOLOGY	X	X	X	X
01733	TUBERCULOSIS OF EYE, TUBERCLE BACILLI FOUND (IN SP	IMMUNOLOGY	X	X	X	X
01734	TUBERCULOSIS OF EYE, TUBERCLE BACILLI NOT FOUND (I	IMMUNOLOGY	X	X	X	X
01735	TUBERCULOSIS OF EYE, TUBERCLE BACILLI NOT FOUND BY	IMMUNOLOGY	X	X	X	X
01736	TUBERCULOSIS OF EYE, TUBERCLE BACILLI NOT FOUND BY	IMMUNOLOGY	X	X	X	X
01740	TUBERCULOSIS OF EAR, UNSPECIFIED EXAMINATION	IMMUNOLOGY	X	X	X	X
01741	TUBERCULOSIS OF EAR, BACTERIOLOGICAL OR HISTOLOGIC	IMMUNOLOGY	X	X	X	X
01742	TUBERCULOSIS OF EAR, BACTERIOLOGICAL OR HISTOLOGIC	IMMUNOLOGY	X	X	X	X
01743	TUBERCULOSIS OF EAR, TUBERCLE BACILLI FOUND (IN SP	IMMUNOLOGY	X	X	X	X
01744	TUBERCULOSIS OF EAR, TUBERCLE BACILLI NOT FOUND (I	IMMUNOLOGY	X	X	X	X
01745	TUBERCULOSIS OF EAR, TUBERCLE BACILLI NOT FOUND BY	IMMUNOLOGY	X	X	X	X
01746	TUBERCULOSIS OF EAR, TUBERCLE BACILLI NOT FOUND BY	IMMUNOLOGY	X	X	X	X
01750	TUBERCULOSIS OF THYROID GLAND, UNSPECIFIED ORIGIN	IMMUNOLOGY	X	X	X	X
01751	TUBERCULOSIS OF THYROID GLAND, BACTERIOLOGICAL OR	IMMUNOLOGY	X	X	X	X
01752	TUBERCULOSIS OF THYROID GLAND, BACTERIOLOGICAL OR	IMMUNOLOGY	X	X	X	X
01753	TUBERCULOSIS OF THYROID GLAND, TUBERCLE BACILLI FO	IMMUNOLOGY	X	X	X	X
01754	TUBERCULOSIS OF THYROID GLAND, TUBERCLE BACILLI NO	IMMUNOLOGY	X	X	X	X
01755	TUBERCULOSIS OF THYROID GLAND, TUBERCLE BACILLI NO	IMMUNOLOGY	X	X	X	X
01756	TUBERCULOSIS OF THYROID GLAND, TUBERCLE BACILLI NO	IMMUNOLOGY	X	X	X	X
01760	TUBERCULOSIS OF ADRENAL GLANDS, UNSPECIFIED EXAMIN	IMMUNOLOGY	X	X	X	X
01761	TUBERCULOSIS OF ADRENAL GLANDS, BACTERIOLOGICAL OR	IMMUNOLOGY	X	X	X	X
01762	TUBERCULOSIS OF ADRENAL GLANDS, BACTERIOLOGICAL OR	IMMUNOLOGY	X	X	X	X
01763	TUBERCULOSIS OF ADRENAL GLANDS, TUBERCLE BACILLI F	IMMUNOLOGY	X	X	X	X
01764	TUBERCULOSIS OF ADRENAL GLANDS, TUBERCLE BACILLI N	IMMUNOLOGY	X	X	X	X
01765	TUBERCULOSIS OF ADRENAL GLANDS, TUBERCLE BACILLI N	IMMUNOLOGY	X	X	X	X
01766	TUBERCULOSIS OF ADRENAL GLANDS, TUBERCLE BACILLI N	IMMUNOLOGY	X	X	X	X
01770	TUBERCULOSIS OF SPLEEN, UNSPECIFIED EXAMINATION	IMMUNOLOGY	X	X	X	X
01771	TUBERCULOSIS OF SPLEEN, BACTERIOLOGICAL OR HISTOLO	IMMUNOLOGY	X	X	X	X
01772	TUBERCULOSIS OF SPLEEN, BACTERIOLOGICAL OR HISTOLO	IMMUNOLOGY	X	X	X	X
01773	TUBERCULOSIS OF SPLEEN, TUBERCLE BACILLI FOUND (IN	IMMUNOLOGY	X	X	X	X
01774	TUBERCULOSIS OF SPLEEN, TUBERCLE BACILLI NOT FOUND	IMMUNOLOGY	X	X	X	X
01775	TUBERCULOSIS OF SPLEEN, TUBERCLE BACILLI NOT FOUND	IMMUNOLOGY	X	X	X	X
01776	TUBERCULOSIS OF SPLEEN, TUBERCLE BACILLI NOT FOUND	IMMUNOLOGY	X	X	X	X
01780	TUBERCULOSIS OF ESOPHAGUS, UNSPECIFIED EXAMINATION	IMMUNOLOGY	X	X	X	X
01781	TUBERCULOSIS OF ESOPHAGUS, BACTERIOLOGICAL OR HIST	IMMUNOLOGY	X	X	X	X
01782	TUBERCULOSIS OF ESOPHAGUS, BACTERIOLOGICAL OR HIST	IMMUNOLOGY	X	X	X	X
01783	TUBERCULOSIS OF ESOPHAGUS, TUBERCLE BACILLI FOUND	IMMUNOLOGY	X	X	X	X
01784	TUBERCULOSIS OF ESOPHAGUS, TUBERCLE BACILLI NOT FO	IMMUNOLOGY	X	X	X	X
01785	TUBERCULOSIS OF ESOPHAGUS, TUBERCLE BACILLI NOT FO	IMMUNOLOGY	X	X	X	X
01786	TUBERCULOSIS OF ESOPHAGUS, TUBERCLE BACILLI NOT FO	IMMUNOLOGY	X	X	X	X
01790	TUBERCULOSIS OF OTHER SPECIFIED ORGANS, UNSPECIFIE	IMMUNOLOGY	X	X	X	X
01791	TUBERCULOSIS OF OTHER SPECIFIED ORGANS, BACTERIOLO	IMMUNOLOGY	X	X	X	X
01792	TUBERCULOSIS OF OTHER SPECIFIED ORGANS, BACTERIOLO	IMMUNOLOGY	X	X	X	X
01793	TUBERCULOSIS OF OTHER SPECIFIED ORGANS, TUBERCLE B	IMMUNOLOGY	X	X	X	X
01794	TUBERCULOSIS OF OTHER SPECIFIED ORGANS, TUBERCLE B	IMMUNOLOGY	X	X	X	X
01795	TUBERCULOSIS OF OTHER SPECIFIED ORGANS, TUBERCLE B	IMMUNOLOGY	X	X	X	X
01796	TUBERCULOSIS OF OTHER SPECIFIED ORGANS, TUBERCLE B	IMMUNOLOGY	X	X	X	X
01800	ACUTE MILIARY TUBERCULOSIS, UNSPECIFIED EXAMINATIO	IMMUNOLOGY	X	X	X	X
01801	ACUTE MILIARY TUBERCULOSIS, BACTERIOLOGICAL OR HIS	IMMUNOLOGY	X	X	X	X
01802	ACUTE MILIARY TUBERCULOSIS, BACTERIOLOGICAL OR HIS	IMMUNOLOGY	X	X	X	X
01803	ACUTE MILIARY TUBERCULOSIS, TUBERCLE BACILLI FOUND	IMMUNOLOGY	X	X	X	X
01804	ACUTE MILIARY TUBERCULOSIS, TUBERCLE BACILLI NOT F	IMMUNOLOGY	X	X	X	X
01805	ACUTE MILIARY TUBERCULOSIS, TUBERCLE BACILLI NOT F	IMMUNOLOGY	X	X	X	X
01806	ACUTE MILIARY TUBERCULOSIS, TUBERCLE BACILLI NOT F	IMMUNOLOGY	X	X	X	X
01880	OTHER SPECIFIED MILIARY TUBERCULOSIS, UNSPECIFIED	IMMUNOLOGY	X	X	X	X
01881	OTHER SPECIFIED MILIARY TUBERCULOSIS, BACTERIOLOGI	IMMUNOLOGY	X	X	X	X
01882	OTHER SPECIFIED MILIARY TUBERCULOSIS, BACTERIOLOGI	IMMUNOLOGY	X	X	X	X
01883	OTHER SPECIFIED MILIARY TUBERCULOSIS, TUBERCLE BAC	IMMUNOLOGY	X	X	X	X
01884	OTHER SPECIFIED MILIARY TUBERCULOSIS, TUBERCLE BAC	IMMUNOLOGY	X	X	X	X
01885	OTHER SPECIFIED MILIARY TUBERCULOSIS, TUBERCLE BAC	IMMUNOLOGY	X	X	X	X
01886	OTHER SPECIFIED MILIARY TUBERCULOSIS, TUBERCLE BAC	IMMUNOLOGY	X	X	X	X
01890	UNSPECIFIED MILIARY TUBERCULOSIS, UNSPECIFIED EXAM	IMMUNOLOGY	X	X	X	X
01891	UNSPECIFIED MILIARY TUBERCULOSIS, BACTERIOLOGICAL	IMMUNOLOGY	X	X	X	X
01892	UNSPECIFIED MILIARY TUBERCULOSIS, BACTERIOLOGICAL	IMMUNOLOGY	X	X	X	X
01893	UNSPECIFIED MILIARY TUBERCULOSIS, TUBERCLE BACILLI	IMMUNOLOGY	X	X	X	X
01894	UNSPECIFIED MILIARY TUBERCULOSIS, TUBERCLE BACILLI	IMMUNOLOGY	X	X	X	X
01895	UNSPECIFIED MILIARY TUBERCULOSIS, TUBERCLE BACILLI	IMMUNOLOGY	X	X	X	X
01896	UNSPECIFIED MILIARY TUBERCULOSIS, TUBERCLE BACILLI	IMMUNOLOGY	X	X	X	X
0200	BUBONIC PLAGUE	IMMUNOLOGY	X	X	X	X
0201	CELLULOCUTANEOUS PLAGUE	IMMUNOLOGY	X	X	X	X
0202	SEPTICEMIC PLAGUE	IMMUNOLOGY	X	X	X	X
0203	PRIMARY PNEUMONIC PLAGUE	IMMUNOLOGY	X	X	X	X
0204	SECONDARY PNEUMONIC PLAGUE	IMMUNOLOGY	X	X	X	X
0205	PNEUMONIC PLAGUE, UNSPECIFIED	IMMUNOLOGY	X	X	X	X
0208	OTHER SPECIFIED TYPES OF PLAGUE	IMMUNOLOGY	X	X	X	X
0209	PLAGUE, UNSPECIFIED	IMMUNOLOGY	X	X	X	X
0210	ULCEROGLANDULAR TULAREMIA	IMMUNOLOGY	X	X	X	X
0211	ENTERIC TULAREMIA	IMMUNOLOGY	X	X	X	X
0212	PULMONARY TULAREMIA	IMMUNOLOGY	X	X	X	X
0213	OCULOGLANDULAR TULAREMIA	IMMUNOLOGY	X	X	X	X
0218	OTHER SPECIFIED TULAREMIA	IMMUNOLOGY	X	X	X	X
0219	UNSPECIFIED TULAREMIA	IMMUNOLOGY	X	X	X	X
0220	CUTANEOUS ANTHRAX	IMMUNOLOGY	X	X	X	X
0221	PULMONARY ANTHRAX	IMMUNOLOGY	X	X	X	X
0222	GASTROINTESTINAL ANTHRAX	IMMUNOLOGY	X	X	X	X
0223	ANTHRAX SEPTICEMIA	IMMUNOLOGY	X	X	X	X
0228	OTHER SPECIFIED MANIFESTATIONS OF ANTHRAX	IMMUNOLOGY	X	X	X	X
0229	ANTHRAX, UNSPECIFIED	IMMUNOLOGY	X	X	X	X
0230	BRUCELLA MELITENSIS	IMMUNOLOGY	X	X	X	X
0231	BRUCELLA ABORTUS	IMMUNOLOGY	X	X	X	X
0232	BRUCELLA SUIS	IMMUNOLOGY	X	X	X	X
0233	BRUCELLA CANIS	IMMUNOLOGY	X	X	X	X
0238	OTHER BRUCELLOSIS	IMMUNOLOGY	X	X	X	X
0239	BRUCELLOSIS, UNSPECIFIED	IMMUNOLOGY	X	X	X	X
024	GLANDERS	IMMUNOLOGY	X	X	X	X
025	MELIOIDOSIS	IMMUNOLOGY	X	X	X	X
0260	SPIRILLARY FEVER	IMMUNOLOGY	X	X	X	X
0261	STREPTOBACILLARY FEVER	IMMUNOLOGY	X	X	X	X
0269	UNSPECIFIED RAT-BITE FEVER	IMMUNOLOGY	X	X	X	X
0270	LISTERIOSIS	IMMUNOLOGY	X	X	X	X
0271	ERYSIPELOTHRIX INFECTION	IMMUNOLOGY	X	X	X	X
0272	PASTEURELLOSIS	IMMUNOLOGY	X	X	X	X
0278	OTHER SPECIFIED ZOONOTIC BACTERIAL DISEASES	IMMUNOLOGY	X	X	X	X
0279	UNSPECIFIED ZOONOTIC BACTERIAL DISEASE	IMMUNOLOGY	X	X	X	X
0300	LEPROMATOUS LEPROSY (TYPE L)	IMMUNOLOGY	X	X	X	X
0301	TUBERCULOID LEPROSY (TYPE T)	IMMUNOLOGY	X	X	X	X
0302	INDETERMINATE LEPROSY (GROUP I)	IMMUNOLOGY	X	X	X	X
0303	BORDERLINE LEPROSY (GROUP B)	IMMUNOLOGY	X	X	X	X
0308	OTHER SPECIFIED LEPROSY	IMMUNOLOGY	X	X	X	X
0309	LEPROSY, UNSPECIFIED	IMMUNOLOGY	X	X	X	X
0310	PULMONARY DISEASES DUE TO OTHER MYCOBACTERIA	IMMUNOLOGY	X	X	X	X
0311	CUTANEOUS DISEASES DUE TO OTHER MYCOBACTERIA	IMMUNOLOGY	X	X	X	X
0312	DISSEMINATED DISEASES DUE TO OTHER MYCOBACTERIA	IMMUNOLOGY	X	X	X	X
0318	OTHER SPECIFIED MYCOBACTERIAL DISEASES	IMMUNOLOGY	X	X	X	X
0319	UNSPECIFIED DISEASES DUE TO MYCOBACTERIA	IMMUNOLOGY	X	X	X	X
0320	FAUCIAL DIPHTHERIA	IMMUNOLOGY	X	X	X	X
0321	NASOPHARYNGEAL DIPHTHERIA	IMMUNOLOGY	X	X	X	X
0322	ANTERIOR NASAL DIPHTHERIA	IMMUNOLOGY	X	X	X	X
0323	LARYNGEAL DIPHTHERIA	IMMUNOLOGY	X	X	X	X
03281	CONJUNCTIVAL DIPHTHERIA	IMMUNOLOGY	X	X	X	X
03282	DIPHTHERITIC MYOCARDITIS	IMMUNOLOGY	X	X	X	X
03283	DIPHTHERITIC PERITONITIS	IMMUNOLOGY	X	X	X	X
03284	DIPHTHERITIC CYSTITIS	IMMUNOLOGY	X	X	X	X
03285	CUTANEOUS DIPHTHERIA	IMMUNOLOGY	X	X	X	X
03289	OTHER SPECIFIED DIPHTHERIA	IMMUNOLOGY	X	X	X	X
0329	DIPHTHERIA, UNSPECIFIED	IMMUNOLOGY	X	X	X	X
0330	WHOOPING COUGH DUE TO BORDETELLA PERTUSSIS [B. PER	IMMUNOLOGY	X	X	X	X
0331	WHOOPING COUGH DUE TO BORDETELLA PARAPERTUSSIS [B.	IMMUNOLOGY	X	X	X	X
0338	WHOOPING COUGH DUE TO OTHER SPECIFIED ORGANISM	IMMUNOLOGY	X	X	X	X
0339	WHOOPING COUGH, UNSPECIFIED ORGANISM	IMMUNOLOGY	X	X	X	X
0340	STREPTOCOCCAL SORE THROAT	IMMUNOLOGY	X	X	X	X
0341	SCARLET FEVER	IMMUNOLOGY	X	X	X	X
035	ERYSIPELAS	IMMUNOLOGY	X	X	X	X
0360	MENINGOCOCCAL MENINGITIS	IMMUNOLOGY	X	X	X	X
0361	MENINGOCOCCAL ENCEPHALITIS	IMMUNOLOGY	X	X	X	X
0362	MENINGOCOCCEMIA	IMMUNOLOGY	X	X	X	X
0363	WATERHOUSE-FRIDERICHSEN SYNDROME, MENINGOCOCCAL	IMMUNOLOGY	X	X	X	X
03640	MENINGOCOCCAL CARDITIS, UNSPECIFIED	IMMUNOLOGY	X	X	X	X
03641	MENINGOCOCCAL PERICARDITIS	IMMUNOLOGY	X	X	X	X
03642	MENINGOCOCCAL ENDOCARDITIS	IMMUNOLOGY	X	X	X	X
03643	MENINGOCOCCAL MYOCARDITIS	IMMUNOLOGY	X	X	X	X
03681	MENINGOCOCCAL OPTIC NEURITIS	IMMUNOLOGY	X	X	X	X
03682	MENINGOCOCCAL ARTHROPATHY	IMMUNOLOGY	X	X	X	X
03689	OTHER SPECIFIED MENINGOCOCCAL INFECTIONS	IMMUNOLOGY	X	X	X	X
0369	MENINGOCOCCAL INFECTION, UNSPECIFIED	IMMUNOLOGY	X	X	X	X
037	TETANUS	IMMUNOLOGY	X	X	X	X
0380	STREPTOCOCCAL SEPTICEMIA	IMMUNOLOGY	X	X	X	X
03810	STAPHYLOCOCCAL SEPTICEMIA, UNSPECIFIED	IMMUNOLOGY	X	X	X	X
03811	METHICILLIN SUSCEPTIBLE STAPHYLOCOCCUS AUREUS SEPT	IMMUNOLOGY	X	X	X	X
03812	METHICILLIN RESISTANT STAPHYLOCOCCUS AUREUS SEPTIC	IMMUNOLOGY	X	X	X	X
03819	OTHER STAPHYLOCOCCAL SEPTICEMIA	IMMUNOLOGY	X	X	X	X
0382	PNEUMOCOCCAL SEPTICEMIA	IMMUNOLOGY	X	X	X	X
0383	SEPTICEMIA DUE TO ANAEROBES	IMMUNOLOGY	X	X	X	X
03840	SEPTICEMIA DUE TO GRAM-NEGATIVE ORGANISM, UNSPECIF	IMMUNOLOGY	X	X	X	X
03841	SEPTICEMIA DUE TO HEMOPHILUS INFLUENZAE [H. INFLUE	IMMUNOLOGY	X	X	X	X
03842	SEPTICEMIA DUE TO ESCHERICHIA COLI [E. COLI]	IMMUNOLOGY	X	X	X	X
03843	SEPTICEMIA DUE TO PSEUDOMONAS	IMMUNOLOGY	X	X	X	X
03844	SEPTICEMIA DUE TO SERRATIA	IMMUNOLOGY	X	X	X	X
03849	OTHER SEPTICEMIA DUE TO GRAM-NEGATIVE ORGANISMS	IMMUNOLOGY	X	X	X	X
0388	OTHER SPECIFIED SEPTICEMIAS	IMMUNOLOGY	X	X	X	X
0389	UNSPECIFIED SEPTICEMIA	IMMUNOLOGY	X	X	X	X
0390	CUTANEOUS ACTINOMYCOTIC INFECTION	IMMUNOLOGY	X	X	X	X
0391	PULMONARY ACTINOMYCOTIC INFECTION	IMMUNOLOGY	X	X	X	X
0392	ABDOMINAL ACTINOMYCOTIC INFECTION	IMMUNOLOGY	X	X	X	X
0393	CERVICOFACIAL ACTINOMYCOTIC INFECTION	IMMUNOLOGY	X	X	X	X
0394	MADURA FOOT	IMMUNOLOGY	X	X	X	X
0398	ACTINOMYCOTIC INFECTION OF OTHER SPECIFIED SITES	IMMUNOLOGY	X	X	X	X
0399	ACTINOMYCOTIC INFECTION OF UNSPECIFIED SITE	IMMUNOLOGY	X	X	X	X
0400	GAS GANGRENE	IMMUNOLOGY	X	X	X	X
0401	RHINOSCLEROMA	IMMUNOLOGY	X	X	X	X
0402	WHIPPLE'S DISEASE	IMMUNOLOGY	X	X	X	X
0403	NECROBACILLOSIS	IMMUNOLOGY	X	X	X	X
04041	INFANT BOTULISM	IMMUNOLOGY	X	X	X	X
04042	WOUND BOTULISM	IMMUNOLOGY	X	X	X	X
04081	TROPICAL PYOMYOSITIS	IMMUNOLOGY	X	X	X	X
04082	TOXIC SHOCK SYNDROME	IMMUNOLOGY	X	X	X	X
04089	OTHER SPECIFIED BACTERIAL DISEASES	IMMUNOLOGY	X	X	X	X
04100	BACTERIAL INFECTION DUE TO UNSPECIFIED STREPTOCOCC	IMMUNOLOGY	X	X	X	X
04101	BACTERIAL INFECTION DUE TO STREPTOCOCCUS, GROUP A	IMMUNOLOGY	X	X	X	X
04102	BACTERIAL INFECTION DUE TO STREPTOCOCCUS, GROUP B	IMMUNOLOGY	X	X	X	X
04103	BACTERIAL INFECTION DUE TO STREPTOCOCCUS, GROUP C	IMMUNOLOGY	X	X	X	X
04104	BACTERIAL INFECTION DUE TO STREPTOCOCCUS, GROUP D	IMMUNOLOGY	X	X	X	X
04105	BACTERIAL INFECTION DUE TO STREPTOCOCCUS, GROUP G	IMMUNOLOGY	X	X	X	X
04109	BACTERIAL INFECTION DUE TO OTHER STREPTOCOCCUS	IMMUNOLOGY	X	X	X	X
04110	BACTERIAL INFECTION DUE TO UNSPECIFIED STAPHYLOCOC	IMMUNOLOGY	X	X	X	X
04111	METHICILLIN SUSCEPTIBLE STAPHYLOCOCCUS AUREUS IN C	IMMUNOLOGY	X	X	X	X
04112	METHICILLIN RESISTANT STAPHYLOCOCCUS AUREUS IN CON	IMMUNOLOGY	X	X	X	X
04119	BACTERIAL INFECTION DUE TO OTHER STAPHYLOCOCCUS	IMMUNOLOGY	X	X	X	X
0412	PNEUMOCOCCUS INFECTION IN CONDITIONS CLASSIFIED EL	IMMUNOLOGY	X	X	X	X
0413	KLEBSIELLA PNEUMONIAE INFECTION IN CONDITIONS CLAS	IMMUNOLOGY	X	X	X	X
0414	ESCHERICHIA COLI [E. COLI] INFECTION IN CONDITIONS CLASSIFIED ELSEWHERE AND OF UNSPECIFIED SITE	IMMUNOLOGY	X	X	X
04141	SHIGA TOXIN-PRODUCING ESCHERICHIA COLI [E. COLI] (	IMMUNOLOGY				X
04142	OTHER SPECIFIED SHIGA TOXIN-PRODUCING ESCHERICHIA	IMMUNOLOGY				X
04143	SHIGA TOXIN-PRODUCING ESCHERICHIA COLI [E. COLI] (	IMMUNOLOGY				X
04149	OTHER AND UNSPECIFIED ESCHERICHIA COLI [E. COLI]	IMMUNOLOGY				X
0415	HEMOPHILUS INFLUENZAE [H. INFLUENZAE] INFECTION IN	IMMUNOLOGY	X	X	X	X
0416	PROTEUS (MIRABILIS) (MORGANII) INFECTION IN CONDIT	IMMUNOLOGY	X	X	X	X
0417	PSEUDOMONAS INFECTION IN CONDITIONS CLASSIFIED ELS	IMMUNOLOGY	X	X	X	X
04181	BACTERIAL INFECTION DUE TO MYCOPLASMA	IMMUNOLOGY	X	X	X	X
04182	BACTERIAL INFECTION DUE TO BACTEROIDES FRAGILIS	IMMUNOLOGY	X	X	X	X
04183	BACTERIAL INFECTION DUE TO CLOSTRIDIUM PERFRINGENS	IMMUNOLOGY	X	X	X	X
04184	BACTERIAL INFECTION DUE TO OTHER ANAEROBES	IMMUNOLOGY	X	X	X	X
04185	BACTERIAL INFECTION DUE TO OTHER GRAM-NEGATIVE ORG	IMMUNOLOGY	X	X	X	X
04186	HELICOBACTER PYLORI [H. PYLORI] INFECTION	IMMUNOLOGY	X	X	X	X
04189	BACTERIAL INFECTION DUE TO OTHER SPECIFIED BACTERI	IMMUNOLOGY	X	X	X	X
0419	BACTERIAL INFECTION, UNSPECIFIED, IN CONDITIONS CL	IMMUNOLOGY	X	X	X	X
042	HUMAN IMMUNODEFICIENCY VIRUS [HIV] DISEASE	IMMUNOLOGY	X	X	X	X
04500	ACUTE PARALYTIC POLIOMYELITIS SPECIFIED AS BULBAR,	IMMUNOLOGY	X	X	X	X
04501	ACUTE PARALYTIC POLIOMYELITIS SPECIFIED AS BULBAR,	IMMUNOLOGY	X	X	X	X
04502	ACUTE PARALYTIC POLIOMYELITIS SPECIFIED AS BULBAR,	IMMUNOLOGY	X	X	X	X
04503	ACUTE PARALYTIC POLIOMYELITIS SPECIFIED AS BULBAR,	IMMUNOLOGY	X	X	X	X
04510	ACUTE POLIOMYELITIS WITH OTHER PARALYSIS, UNSPECIF	IMMUNOLOGY	X	X	X	X
04511	ACUTE POLIOMYELITIS WITH OTHER PARALYSIS, POLIOVIR	IMMUNOLOGY	X	X	X	X
04512	ACUTE POLIOMYELITIS WITH OTHER PARALYSIS, POLIOVIR	IMMUNOLOGY	X	X	X	X
04513	ACUTE POLIOMYELITIS WITH OTHER PARALYSIS, POLIOVIR	IMMUNOLOGY	X	X	X	X
04520	ACUTE NONPARALYTIC POLIOMYELITIS, UNSPECIFIED TYPE	IMMUNOLOGY	X	X	X	X
04521	ACUTE NONPARALYTIC POLIOMYELITIS, POLIOVIRUS TYPE	IMMUNOLOGY	X	X	X	X
04522	ACUTE NONPARALYTIC POLIOMYELITIS, POLIOVIRUS TYPE	IMMUNOLOGY	X	X	X	X
04523	ACUTE NONPARALYTIC POLIOMYELITIS, POLIOVIRUS TYPE	IMMUNOLOGY	X	X	X	X
04590	ACUTE POLIOMYELITIS, UNSPECIFIED, POLIOVIRUS, UNSP	IMMUNOLOGY	X	X	X	X
04591	ACUTE POLIOMYELITIS, UNSPECIFIED, POLIOVIRUS TYPE	IMMUNOLOGY	X	X	X	X
04592	ACUTE POLIOMYELITIS, UNSPECIFIED, POLIOVIRUS TYPE	IMMUNOLOGY	X	X	X	X
04593	ACUTE POLIOMYELITIS, UNSPECIFIED, POLIOVIRUS TYPE	IMMUNOLOGY	X	X	X	X
046	CNS_SLOW_V	IMMUNOLOGY	X
0460	KURU	IMMUNOLOGY	X	X	X	X
0461	JAKOB-CREUTZFELDT DIS	IMMUNOLOGY	X
04611	VARIANT CREUTZFELDT-JAKOB DISEASE	IMMUNOLOGY	X	X	X	X
04619	OTHER AND UNSPECIFIED CREUTZFELDT-JAKOB DISEASE	IMMUNOLOGY	X	X	X	X
0462	SUBACUTE SCLEROSING PANENCEPHALITIS	IMMUNOLOGY	X	X	X	X
0463	PROGRESSIVE MULTIFOCAL LEUKOENCEPHALOPATHY	IMMUNOLOGY	X	X	X	X
04671	GERSTMANN-STRAUSSLER-SCHEINKER SYNDROME	IMMUNOLOGY	X	X	X	X
04672	FATAL FAMILIAL INSOMNIA	IMMUNOLOGY	X	X	X	X
04679	OTHER AND UNSPECIFIED PRION DISEASE OF CENTRAL NER	IMMUNOLOGY	X	X	X	X
0468	OTHER SPECIFIED SLOW VIRUS INFECTION OF CENTRAL NE	IMMUNOLOGY	X	X	X	X
0469	UNSPECIFIED SLOW VIRUS INFECTION OF CENTRAL NERVOU	IMMUNOLOGY	X	X	X	X
0470	MENINGITIS DUE TO COXSACKIE VIRUS	IMMUNOLOGY	X	X	X	X
0471	MENINGITIS DUE TO ECHO VIRUS	IMMUNOLOGY	X	X	X	X
0478	OTHER SPECIFIED VIRAL MENINGITIS	IMMUNOLOGY	X	X	X	X
0479	UNSPECIFIED VIRAL MENINGITIS	IMMUNOLOGY	X	X	X	X
048	OTHER ENTEROVIRUS DISEASES OF CENTRAL NERVOUS SYST	IMMUNOLOGY	X	X	X	X
0490	NON-ARTHROPOD BORNE LYMPHOCYTIC CHORIOMENINGITIS	IMMUNOLOGY	X	X	X	X
0491	NON-ARTHROPOD BORNE MENINGITIS DUE TO ADENOVIRUS	IMMUNOLOGY	X	X	X	X
0498	OTHER SPECIFIED NON-ARTHROPOD-BORNE VIRAL DISEASES	IMMUNOLOGY	X	X	X	X
0499	UNSPECIFIED NON-ARTHROPOD-BORNE VIRAL DISEASES OF	IMMUNOLOGY	X	X	X	X
0500	VARIOLA MAJOR	IMMUNOLOGY	X	X	X	X
0501	ALASTRIM	IMMUNOLOGY	X	X	X	X
0502	MODIFIED SMALLPOX	IMMUNOLOGY	X	X	X	X
0509	SMALLPOX, UNSPECIFIED	IMMUNOLOGY	X	X	X	X
051	COWPOX AND PARAVACCINIA	IMMUNOLOGY	X
0510	COWPOX & VACCINIA	IMMUNOLOGY	X
05101	COWPOX	IMMUNOLOGY	X	X	X	X
05102	VACCINIA NOT FROM VACCINATION	IMMUNOLOGY	X	X	X	X
0511	PSEUDOCOWPOX	IMMUNOLOGY	X	X	X	X
0512	CONTAGIOUS PUSTULAR DERMATITIS	IMMUNOLOGY	X	X	X	X
0519	PARAVACCINIA, UNSPECIFIED	IMMUNOLOGY	X	X	X	X
0520	POSTVARICELLA ENCEPHALITIS	IMMUNOLOGY	X	X	X	X
0521	VARICELLA (HEMORRHAGIC) PNEUMONITIS	IMMUNOLOGY	X	X	X	X
0522	POSTVARICELLA MYELITIS	IMMUNOLOGY	X	X	X	X
0527	CHICKENPOX WITH OTHER SPECIFIED COMPLICATIONS	IMMUNOLOGY	X	X	X	X
0528	CHICKENPOX WITH UNSPECIFIED COMPLICATION	IMMUNOLOGY	X	X	X	X
0529	VARICELLA WITHOUT MENTION OF COMPLICATION	IMMUNOLOGY	X	X	X	X
0530	HERPES ZOSTER WITH MENINGITIS	IMMUNOLOGY	X	X	X	X
05310	HERPES ZOSTER WITH UNSPECIFIED NERVOUS SYSTEM COMP	IMMUNOLOGY	X	X	X	X
05311	GENICULATE HERPES ZOSTER	IMMUNOLOGY	X	X	X	X
05312	POSTHERPETIC TRIGEMINAL NEURALGIA	IMMUNOLOGY	X	X	X	X
05313	POSTHERPETIC POLYNEUROPATHY	IMMUNOLOGY	X	X	X	X
05314	HERPES ZOSTER MYELITIS	IMMUNOLOGY	X	X	X	X
05319	HERPES ZOSTER WITH OTHER NERVOUS SYSTEM COMPLICATI	IMMUNOLOGY	X	X	X	X
05320	HERPES ZOSTER DERMATITIS OF EYELID	IMMUNOLOGY	X	X	X	X
05321	HERPES ZOSTER KERATOCONJUNCTIVITIS	IMMUNOLOGY	X	X	X	X
05322	HERPES ZOSTER IRIDOCYCLITIS	IMMUNOLOGY	X	X	X	X
05329	HERPES ZOSTER WITH OTHER OPHTHALMIC COMPLICATIONS	IMMUNOLOGY	X	X	X	X
05371	OTITIS EXTERNA DUE TO HERPES ZOSTER	IMMUNOLOGY	X	X	X	X
05379	HERPES ZOSTER WITH OTHER SPECIFIED COMPLICATIONS	IMMUNOLOGY	X	X	X	X
0538	HERPES ZOSTER WITH UNSPECIFIED COMPLICATION	IMMUNOLOGY	X	X	X	X
0539	HERPES ZOSTER WITHOUT MENTION OF COMPLICATION	IMMUNOLOGY	X	X	X	X
0540	ECZEMA HERPETICUM	IMMUNOLOGY	X	X	X	X
05410	GENITAL HERPES, UNSPECIFIED	IMMUNOLOGY	X	X	X	X
05411	HERPETIC VULVOVAGINITIS	IMMUNOLOGY	X	X	X	X
05412	HERPETIC ULCERATION OF VULVA	IMMUNOLOGY	X	X	X	X
05413	HERPETIC INFECTION OF PENIS	IMMUNOLOGY	X	X	X	X
05419	OTHER GENITAL HERPES	IMMUNOLOGY	X	X	X	X
0542	HERPETIC GINGIVOSTOMATITIS	IMMUNOLOGY	X	X	X	X
0543	HERPETIC MENINGOENCEPHALITIS	IMMUNOLOGY	X	X	X	X
05440	HERPES SIMPLEX WITH UNSPECIFIED OPHTHALMIC COMPLIC	IMMUNOLOGY	X	X	X	X
05441	HERPES SIMPLEX DERMATITIS OF EYELID	IMMUNOLOGY	X	X	X	X
05442	DENDRITIC KERATITIS	IMMUNOLOGY	X	X	X	X
05443	HERPES SIMPLEX DISCIFORM KERATITIS	IMMUNOLOGY	X	X	X	X
05444	HERPES SIMPLEX IRIDOCYCLITIS	IMMUNOLOGY	X	X	X	X
05449	HERPES SIMPLEX WITH OTHER OPHTHALMIC COMPLICATIONS	IMMUNOLOGY	X	X	X	X
0545	HERPETIC SEPTICEMIA	IMMUNOLOGY	X	X	X	X
0546	HERPETIC WHITLOW	IMMUNOLOGY	X	X	X	X
05471	HERPES SIMPLEX VISCERAL	IMMUNOLOGY	X	X	X	X
05472	HERPES SIMPLEX MENINGITIS	IMMUNOLOGY	X	X	X	X
05473	HERPES SIMPLEX OTITIS EXTERNA	IMMUNOLOGY	X	X	X	X
05474	HERPES SIMPLEX MYELITIS	IMMUNOLOGY	X	X	X	X
05479	HERPES SIMPLEX WITH OTHER SPECIFIED COMPLICATIONS	IMMUNOLOGY	X	X	X	X
0548	HERPES SIMPLEX WITH UNSPECIFIED COMPLICATION	IMMUNOLOGY	X	X	X	X
0549	HERPES SIMPLEX WITHOUT MENTION OF COMPLICATION	IMMUNOLOGY	X	X	X	X
0550	POSTMEASLES ENCEPHALITIS	IMMUNOLOGY	X	X	X	X
0551	POSTMEASLES PNEUMONIA	IMMUNOLOGY	X	X	X	X
0552	POSTMEASLES OTITIS MEDIA	IMMUNOLOGY	X	X	X	X
05571	MEASLES KERATOCONJUNCTIVITIS	IMMUNOLOGY	X	X	X	X
05579	MEASLES WITH OTHER SPECIFIED COMPLICATIONS	IMMUNOLOGY	X	X	X	X
0558	MEASLES WITH UNSPECIFIED COMPLICATION	IMMUNOLOGY	X	X	X	X
0559	MEASLES WITHOUT MENTION OF COMPLICATION	IMMUNOLOGY	X	X	X	X
05600	RUBELLA WITH UNSPECIFIED NEUROLOGICAL COMPLICATION	IMMUNOLOGY	X	X	X	X
05601	ENCEPHALOMYELITIS DUE TO RUBELLA	IMMUNOLOGY	X	X	X	X
05609	RUBELLA WITH OTHER NEUROLOGICAL COMPLICATIONS	IMMUNOLOGY	X	X	X	X
05671	ARTHRITIS DUE TO RUBELLA	IMMUNOLOGY	X	X	X	X
05679	RUBELLA WITH OTHER SPECIFIED COMPLICATIONS	IMMUNOLOGY	X	X	X	X
0568	RUBELLA WITH UNSPECIFIED COMPLICATIONS	IMMUNOLOGY	X	X	X	X
0569	RUBELLA WITHOUT MENTION OF COMPLICATION	IMMUNOLOGY	X	X	X	X
0570	ERYTHEMA INFECTIOSUM [FIFTH DISEASE]	IMMUNOLOGY	X	X	X	X
0578	OTHER SPECIFIED VIRAL EXANTHEMATA	IMMUNOLOGY	X	X	X	X
0579	VIRAL EXANTHEM, UNSPECIFIED	IMMUNOLOGY	X	X	X	X
05810	ROSEOLA INFANTUM, UNSPECIFIED	IMMUNOLOGY	X	X	X	X
05811	ROSEOLA INFANTUM DUE TO HUMAN HERPESVIRUS 6	IMMUNOLOGY	X	X	X	X
05812	ROSEOLA INFANTUM DUE TO HUMAN HERPESVIRUS 7	IMMUNOLOGY	X	X	X	X
05821	HUMAN HERPESVIRUS 6 ENCEPHALITIS	IMMUNOLOGY	X	X	X	X
05829	OTHER HUMAN HERPESVIRUS ENCEPHALITIS	IMMUNOLOGY	X	X	X	X
05881	HUMAN HERPESVIRUS 6 INFECTION	IMMUNOLOGY	X	X	X	X
05882	HUMAN HERPESVIRUS 7 INFECTION	IMMUNOLOGY	X	X	X	X
05889	OTHER HUMAN HERPESVIRUS INFECTION	IMMUNOLOGY	X	X	X	X
05900	ORTHOPOXVIRUS INFECTION, UNSPECIFIED	IMMUNOLOGY	X	X	X	X
05901	MONKEYPOX	IMMUNOLOGY	X	X	X	X
05909	OTHER ORTHOPOXVIRUS INFECTIONS	IMMUNOLOGY	X	X	X	X
05910	PARAPOXVIRUS INFECTION, UNSPECIFIED	IMMUNOLOGY	X	X	X	X
05911	BOVINE STOMATITIS	IMMUNOLOGY	X	X	X	X
05912	SEALPOX	IMMUNOLOGY	X	X	X	X
05919	OTHER PARAPOXVIRUS INFECTIONS	IMMUNOLOGY	X	X	X	X
05920	YATAPOXVIRUS INFECTION, UNSPECIFIED	IMMUNOLOGY	X	X	X	X
05921	TANAPOX	IMMUNOLOGY	X	X	X	X
05922	YABA MONKEY TUMOR VIRUS	IMMUNOLOGY	X	X	X	X
0598	OTHER POXVIRUS INFECTIONS	IMMUNOLOGY	X	X	X	X
0599	POXVIRUS INFECTIONS, UNSPECIFIED	IMMUNOLOGY	X	X	X	X
0600	SYLVATIC YELLOW FEVER	IMMUNOLOGY	X	X	X	X
0601	URBAN YELLOW FEVER	IMMUNOLOGY	X	X	X	X
0609	YELLOW FEVER, UNSPECIFIED	IMMUNOLOGY	X	X	X	X
061	DENGUE	IMMUNOLOGY	X	X	X	X
0620	JAPANESE ENCEPHALITIS	IMMUNOLOGY	X	X	X	X
0621	WESTERN EQUINE ENCEPHALITIS	IMMUNOLOGY	X	X	X	X
0622	EASTERN EQUINE ENCEPHALITIS	IMMUNOLOGY	X	X	X	X
0623	ST. LOUIS ENCEPHALITIS	IMMUNOLOGY	X	X	X	X
0624	AUSTRALIAN ENCEPHALITIS	IMMUNOLOGY	X	X	X	X
0625	CALIFORNIA VIRUS ENCEPHALITIS	IMMUNOLOGY	X	X	X	X
0628	OTHER SPECIFIED MOSQUITO-BORNE VIRAL ENCEPHALITIS	IMMUNOLOGY	X	X	X	X
0629	MOSQUITO-BORNE VIRAL ENCEPHALITIS, UNSPECIFIED	IMMUNOLOGY	X	X	X	X
0630	RUSSIAN SPRING-SUMMER [TAIGA] ENCEPHALITIS	IMMUNOLOGY	X	X	X	X
0631	LOUPING ILL	IMMUNOLOGY	X	X	X	X
0632	CENTRAL EUROPEAN ENCEPHALITIS	IMMUNOLOGY	X	X	X	X
0638	OTHER SPECIFIED TICK-BORNE VIRAL ENCEPHALITIS	IMMUNOLOGY	X	X	X	X
0639	TICK-BORNE VIRAL ENCEPHALITIS, UNSPECIFIED	IMMUNOLOGY	X	X	X	X
064	VIRAL ENCEPHALITIS TRANSMITTED BY OTHER AND UNSPEC	IMMUNOLOGY	X	X	X	X
0650	CRIMEAN HEMORRHAGIC FEVER [CHF CONGO VIRUS]	IMMUNOLOGY	X	X	X	X
0651	OMSK HEMORRHAGIC FEVER	IMMUNOLOGY	X	X	X	X
0652	KYASANUR FOREST DISEASE	IMMUNOLOGY	X	X	X	X
0653	OTHER TICK-BORNE HEMORRHAGIC FEVER	IMMUNOLOGY	X	X	X	X
0654	MOSQUITO-BORNE HEMORRHAGIC FEVER	IMMUNOLOGY	X	X	X	X
0658	OTHER SPECIFIED ARTHROPOD-BORNE HEMORRHAGIC FEVER	IMMUNOLOGY	X	X	X	X
0659	ARTHROPOD-BORNE HEMORRHAGIC FEVER, UNSPECIFIED	IMMUNOLOGY	X	X	X	X
0660	PHLEBOTOMUS FEVER	IMMUNOLOGY	X	X	X	X
0661	TICK-BORNE FEVER	IMMUNOLOGY	X	X	X	X
0662	VENEZUELAN EQUINE FEVER	IMMUNOLOGY	X	X	X	X
0663	OTHER MOSQUITO-BORNE FEVER	IMMUNOLOGY	X	X	X	X
06640	WEST NILE FEVER, UNSPECIFIED	IMMUNOLOGY	X	X	X	X
06641	WEST NILE FEVER WITH ENCEPHALITIS	IMMUNOLOGY	X	X	X	X
06642	WEST NILE FEVER WITH OTHER NEUROLOGIC MANIFESTATIO	IMMUNOLOGY	X	X	X	X
06649	WEST NILE FEVER WITH OTHER COMPLICATIONS	IMMUNOLOGY	X	X	X	X
0668	OTHER SPECIFIED ARTHROPOD-BORNE VIRAL DISEASES	IMMUNOLOGY	X	X	X	X
0669	ARTHROPOD-BORNE VIRAL DISEASE, UNSPECIFIED	IMMUNOLOGY	X	X	X	X
0700	VIRAL HEPATITIS A WITH HEPATIC COMA	IMMUNOLOGY	X	X	X	X
0701	VIRAL HEPATITIS A WITHOUT MENTION OF HEPATIC COMA	IMMUNOLOGY	X	X	X	X
07020	VIRAL HEPATITIS B WITH HEPATIC COMA, ACUTE OR UNSP	IMMUNOLOGY	X	X	X	X
07021	VIRAL HEPATITIS B WITH HEPATIC COMA, ACUTE OR UNSP	IMMUNOLOGY	X	X	X	X
07022	CHRONIC VIRAL HEPATITIS B WITH HEPATIC COMA, WITHO	IMMUNOLOGY	X	X	X	X
07023	CHRONIC VIRAL HEPATITIS B WITH HEPATIC COMA WITH H	IMMUNOLOGY	X	X	X	X
07030	VIRAL HEPATITIS B WITHOUT MENTION OF HEPATIC COMA,	IMMUNOLOGY	X	X	X	X
07031	VIRAL HEPATITIS B WITHOUT MENTION OF HEPATIC COMA,	IMMUNOLOGY	X	X	X	X
07032	CHRONIC VIRAL HEPATITIS B WITHOUT MENTION OF HEPAT	IMMUNOLOGY	X	X	X	X
07033	CHRONIC VIRAL HEPATITIS B WITHOUT MENTION OF HEPAT	IMMUNOLOGY	X	X	X	X
07041	ACUTE HEPATITIS C WITH HEPATIC COMA	IMMUNOLOGY	X	X	X	X
07042	HEPATITIS DELTA WITHOUT MENTION OF ACTIVE HEPATITI	IMMUNOLOGY	X	X	X	X
07043	HEPATITIS E WITH HEPATIC COMA	IMMUNOLOGY	X	X	X	X
07044	CHRONIC HEPATITIS C WITH HEPATIC COMA	IMMUNOLOGY	X	X	X	X
07049	OTHER SPECIFIED VIRAL HEPATITIS WITH HEPATIC COMA	IMMUNOLOGY	X	X	X	X
07051	ACUTE HEPATITIS C WITHOUT MENTION OF HEPATIC COMA	IMMUNOLOGY	X	X	X	X
07052	HEPATITIS DELTA WITHOUT MENTION OF ACTIVE HEPATITI	IMMUNOLOGY	X	X	X	X
07053	HEPATITIS E WITHOUT MENTION OF HEPATIC COMA	IMMUNOLOGY	X	X	X	X
07054	CHRONIC HEPATITIS C WITHOUT MENTION OF HEPATIC COM	IMMUNOLOGY	X	X	X	X
07059	OTHER SPECIFIED VIRAL HEPATITIS WITHOUT MENTION OF	IMMUNOLOGY	X	X	X	X
0706	UNSPECIFIED VIRAL HEPATITIS WITH HEPATIC COMA	IMMUNOLOGY	X	X	X	X
07070	UNSPECIFIED VIRAL HEPATITIS C WITHOUT HEPATIC COMA	IMMUNOLOGY	X	X	X	X
07071	UNSPECIFIED VIRAL HEPATITIS C WITH HEPATIC COMA	IMMUNOLOGY	X	X	X	X
0709	UNSPECIFIED VIRAL HEPATITIS WITHOUT MENTION OF HEP	IMMUNOLOGY	X	X	X	X
071	RABIES	IMMUNOLOGY	X	X	X	X
0720	MUMPS ORCHITIS	IMMUNOLOGY	X	X	X	X
0721	MUMPS MENINGITIS	IMMUNOLOGY	X	X	X	X
0722	MUMPS ENCEPHALITIS	IMMUNOLOGY	X	X	X	X
0723	MUMPS PANCREATITIS	IMMUNOLOGY	X	X	X	X
07271	MUMPS HEPATITIS	IMMUNOLOGY	X	X	X	X
07272	MUMPS POLYNEUROPATHY	IMMUNOLOGY	X	X	X	X
07279	MUMPS WITH OTHER SPECIFIED COMPLICATIONS	IMMUNOLOGY	X	X	X	X
0728	MUMPS WITH UNSPECIFIED COMPLICATION	IMMUNOLOGY	X	X	X	X
0729	MUMPS WITHOUT MENTION OF COMPLICATION	IMMUNOLOGY	X	X	X	X
0730	ORNITHOSIS WITH PNEUMONIA	IMMUNOLOGY	X	X	X	X
0737	ORNITHOSIS WITH OTHER SPECIFIED COMPLICATIONS	IMMUNOLOGY	X	X	X	X
0738	ORNITHOSIS WITH UNSPECIFIED COMPLICATION	IMMUNOLOGY	X	X	X	X
0739	ORNITHOSIS, UNSPECIFIED	IMMUNOLOGY	X	X	X	X
0740	HERPANGINA	IMMUNOLOGY	X	X	X	X
0741	EPIDEMIC PLEURODYNIA	IMMUNOLOGY	X	X	X	X
07420	COXSACKIE CARDITIS, UNSPECIFIED	IMMUNOLOGY	X	X	X	X
07421	COXSACKIE PERICARDITIS	IMMUNOLOGY	X	X	X	X
07422	COXSACKIE ENDOCARDITIS	IMMUNOLOGY	X	X	X	X
07423	COXSACKIE MYOCARDITIS	IMMUNOLOGY	X	X	X	X
0743	HAND, FOOT, AND MOUTH DISEASE	IMMUNOLOGY	X	X	X	X
0748	OTHER SPECIFIED DISEASES DUE TO COXSACKIE VIRUS	IMMUNOLOGY	X	X	X	X
075	INFECTIOUS MONONUCLEOSIS	IMMUNOLOGY	X	X	X	X
0760	TRACHOMA, INITIAL STAGE	IMMUNOLOGY	X	X	X	X
0761	TRACHOMA, ACTIVE STAGE	IMMUNOLOGY	X	X	X	X
0769	TRACHOMA, UNSPECIFIED	IMMUNOLOGY	X	X	X	X
0770	INCLUSION CONJUNCTIVITIS	IMMUNOLOGY	X	X	X	X
0771	EPIDEMIC KERATOCONJUNCTIVITIS	IMMUNOLOGY	X	X	X	X
0772	PHARYNGOCONJUNCTIVAL FEVER	IMMUNOLOGY	X	X	X	X
0773	OTHER ADENOVIRAL CONJUNCTIVITIS	IMMUNOLOGY	X	X	X	X
0774	EPIDEMIC HEMORRHAGIC CONJUNCTIVITIS	IMMUNOLOGY	X	X	X	X
0778	OTHER VIRAL CONJUNCTIVITIS	IMMUNOLOGY	X	X	X	X
07798	UNSPECIFIED DISEASES OF CONJUNCTIVA DUE TO CHLAMYD	IMMUNOLOGY	X	X	X	X
07799	UNSPECIFIED DISEASES OF CONJUNCTIVA DUE TO VIRUSES	IMMUNOLOGY	X	X	X	X
0780	MOLLUSCUM CONTAGIOSUM	IMMUNOLOGY	X	X	X	X
07810	VIRAL WARTS, UNSPECIFIED	IMMUNOLOGY	X	X	X	X
07811	CONDYLOMA ACUMINATUM	IMMUNOLOGY	X	X	X	X
07812	PLANTAR WART	IMMUNOLOGY	X	X	X	X
07819	OTHER SPECIFIED VIRAL WARTS	IMMUNOLOGY	X	X	X	X
0782	SWEATING FEVER	IMMUNOLOGY	X	X	X	X
0783	CAT-SCRATCH DISEASE	IMMUNOLOGY	X	X	X	X
0784	FOOT AND MOUTH DISEASE	IMMUNOLOGY	X	X	X	X
0785	CYTOMEGALOVIRAL DISEASE	IMMUNOLOGY	X	X	X	X
0786	HEMORRHAGIC NEPHROSONEPHRITIS	IMMUNOLOGY	X	X	X	X
0787	ARENAVIRAL HEMORRHAGIC FEVER	IMMUNOLOGY	X	X	X	X
07881	EPIDEMIC VERTIGO	IMMUNOLOGY	X	X	X	X
07882	EPIDEMIC VOMITING SYNDROME	IMMUNOLOGY	X	X	X	X
07888	OTHER SPECIFIED DISEASES DUE TO CHLAMYDIAE	IMMUNOLOGY	X	X	X	X
07889	OTHER SPECIFIED DISEASES DUE TO VIRUSES	IMMUNOLOGY	X	X	X	X
0790	ADENOVIRUS INFECTION IN CONDITIONS CLASSIFIED ELSE	IMMUNOLOGY	X	X	X	X
0791	ECHO VIRUS INFECTION IN CONDITIONS CLASSIFIED ELSE	IMMUNOLOGY	X	X	X	X
0792	COXSACKIE VIRUS INFECTION IN CONDITIONS CLASSIFIED	IMMUNOLOGY	X	X	X	X
0793	RHINOVIRUS INFECTION IN CONDITIONS CLASSIFIED ELSE	IMMUNOLOGY	X	X	X	X
0794	HUMAN PAPILLOMAVIRUS INFECTION IN CONDITIONS CLASS	IMMUNOLOGY	X	X	X	X
07950	RETROVIRUS, UNSPECIFIED	IMMUNOLOGY	X	X	X	X
07951	HUMAN T-CELL LYMPHOTROPHIC VIRUS, TYPE I [HTLV-I]	IMMUNOLOGY	X	X	X	X
07952	HUMAN T-CELL LYMPHOTROPHIC VIRUS, TYPE II [HTLV-II	IMMUNOLOGY	X	X	X	X
07953	HUMAN IMMUNODEFICIENCY VIRUS, TYPE 2 [HIV 2]	IMMUNOLOGY	X	X	X	X
07959	OTHER SPECIFIED RETROVIRUS	IMMUNOLOGY	X	X	X	X
0796	RESPIRATORY SYNCYTIAL VIRUS (RSV) INFECTION IN CON	IMMUNOLOGY	X	X	X	X
07981	HANTAVIRUS INFECTION	IMMUNOLOGY	X	X	X	X
07982	SARS-ASSOCIATED CORONAVIRUS	IMMUNOLOGY	X	X	X	X
07983	PARVOVIRUS B19	IMMUNOLOGY	X	X	X	X
07988	OTHER SPECIFIED CHLAMYDIAL INFECTION	IMMUNOLOGY	X	X	X	X
07989	OTHER SPECIFIED VIRAL INFECTION	IMMUNOLOGY	X	X	X	X
07998	UNSPECIFIED CHLAMYDIAL INFECTION	IMMUNOLOGY	X	X	X	X
07999	UNSPECIFIED VIRAL INFECTION	IMMUNOLOGY	X	X	X	X
080	LOUSE-BORNE [EPIDEMIC] TYPHUS	IMMUNOLOGY	X	X	X	X
0810	MURINE [ENDEMIC] TYPHUS	IMMUNOLOGY	X	X	X	X
0811	BRILL'S DISEASE	IMMUNOLOGY	X	X	X	X
0812	SCRUB TYPHUS	IMMUNOLOGY	X	X	X	X
0819	TYPHUS, UNSPECIFIED	IMMUNOLOGY	X	X	X	X
0820	SPOTTED FEVERS	IMMUNOLOGY	X	X	X	X
0821	BOUTONNEUSE FEVER	IMMUNOLOGY	X	X	X	X
0822	NORTH ASIAN TICK FEVER	IMMUNOLOGY	X	X	X	X
0823	QUEENSLAND TICK TYPHUS	IMMUNOLOGY	X	X	X	X
08240	UNSPECIFIED EHRLICHIOSIS	IMMUNOLOGY	X	X	X	X
08241	EHRLICHIOSIS CHAFFEENSIS [E. CHAFFEENSIS]	IMMUNOLOGY	X	X	X	X
08249	OTHER EHRLICHIOSIS	IMMUNOLOGY	X	X	X	X
0828	OTHER SPECIFIED TICK-BORNE RICKETTSIOSES	IMMUNOLOGY	X	X	X	X
0829	TICK-BORNE RICKETTSIOSIS, UNSPECIFIED	IMMUNOLOGY	X	X	X	X
0830	Q FEVER	IMMUNOLOGY	X	X	X	X
0831	TRENCH FEVER	IMMUNOLOGY	X	X	X	X
0832	RICKETTSIALPOX	IMMUNOLOGY	X	X	X	X
0838	OTHER SPECIFIED RICKETTSIOSES	IMMUNOLOGY	X	X	X	X
0839	RICKETTSIOSIS, UNSPECIFIED	IMMUNOLOGY	X	X	X	X
0840	FALCIPARUM MALARIA [MALIGNANT TERTIAN]	IMMUNOLOGY	X	X	X	X
0841	VIVAX MALARIA [BENIGN TERTIAN]	IMMUNOLOGY	X	X	X	X
0842	QUARTAN MALARIA	IMMUNOLOGY	X	X	X	X
0843	OVALE MALARIA	IMMUNOLOGY	X	X	X	X
0844	OTHER MALARIA	IMMUNOLOGY	X	X	X	X
0845	MIXED MALARIA	IMMUNOLOGY	X	X	X	X
0846	MALARIA, UNSPECIFIED	IMMUNOLOGY	X	X	X	X
0847	INDUCED MALARIA	IMMUNOLOGY	X	X	X	X
0848	BLACKWATER FEVER	IMMUNOLOGY	X	X	X	X
0849	OTHER PERNICIOUS COMPLICATIONS OF MALARIA	IMMUNOLOGY	X	X	X	X
0850	LEISHMANIASIS VISCERAL (KALA-AZAR)	IMMUNOLOGY	X	X	X	X
0851	CUTANEOUS LEISHMANIASIS, URBAN	IMMUNOLOGY	X	X	X	X
0852	CUTANEOUS LEISHMANIASIS, ASIAN DESERT	IMMUNOLOGY	X	X	X	X
0853	CUTANEOUS LEISHMANIASIS, ETHIOPIAN	IMMUNOLOGY	X	X	X	X
0854	CUTANEOUS LEISHMANIASIS, AMERICAN	IMMUNOLOGY	X	X	X	X
0855	MUCOCUTANEOUS LEISHMANIASIS, (AMERICAN)	IMMUNOLOGY	X	X	X	X
0859	LEISHMANIASIS, UNSPECIFIED	IMMUNOLOGY	X	X	X	X
0860	CHAGAS' DISEASE WITH HEART INVOLVEMENT	IMMUNOLOGY	X	X	X	X
0861	CHAGAS' DISEASE WITH OTHER ORGAN INVOLVEMENT	IMMUNOLOGY	X	X	X	X
0862	CHAGAS' DISEASE WITHOUT MENTION OF ORGAN INVOLVEME	IMMUNOLOGY	X	X	X	X
0863	GAMBIAN TRYPANOSOMIASIS	IMMUNOLOGY	X	X	X	X
0864	RHODESIAN TRYPANOSOMIASIS	IMMUNOLOGY	X	X	X	X
0865	AFRICAN TRYPANOSOMIASIS, UNSPECIFIED	IMMUNOLOGY	X	X	X	X
0869	TRYPANOSOMIASIS, UNSPECIFIED	IMMUNOLOGY	X	X	X	X
0870	RELAPSING FEVER, LOUSE-BORNE	IMMUNOLOGY	X	X	X	X
0871	RELAPSING FEVER, TICK-BORNE	IMMUNOLOGY	X	X	X	X
0879	RELAPSING FEVER, UNSPECIFIED	IMMUNOLOGY	X	X	X	X
0880	BARTONELLOSIS	IMMUNOLOGY	X	X	X	X
08881	LYME DISEASE	IMMUNOLOGY	X	X	X	X
08882	BABESIOSIS	IMMUNOLOGY	X	X	X	X
08889	OTHER SPECIFIED ARTHROPOD-BORNE DISEASES	IMMUNOLOGY	X	X	X	X
0889	ARTHROPOD-BORNE DISEASE, UNSPECIFIED	IMMUNOLOGY	X	X	X	X
0900	EARLY CONGENITAL SYPHILIS, SYMPTOMATIC	IMMUNOLOGY	X	X	X	X
0901	EARLY CONGENITAL SYPHILIS, LATENT	IMMUNOLOGY	X	X	X	X
0902	EARLY CONGENITAL SYPHILIS, UNSPECIFIED	IMMUNOLOGY	X	X	X	X
0903	SYPHILITIC INTERSTITIAL KERATITIS	IMMUNOLOGY	X	X	X	X
09040	JUVENILE NEUROSYPHILIS, UNSPECIFIED	IMMUNOLOGY	X	X	X	X
09041	CONGENITAL SYPHILITIC ENCEPHALITIS	IMMUNOLOGY	X	X	X	X
09042	CONGENITAL SYPHILITIC MENINGITIS	IMMUNOLOGY	X	X	X	X
09049	OTHER JUVENILE NEUROSYPHILIS	IMMUNOLOGY	X	X	X	X
0905	OTHER LATE CONGENITAL SYPHILIS, SYMPTOMATIC	IMMUNOLOGY	X	X	X	X
0906	LATE CONGENITAL SYPHILIS, LATENT	IMMUNOLOGY	X	X	X	X
0907	LATE CONGENITAL SYPHILIS, UNSPECIFIED	IMMUNOLOGY	X	X	X	X
0909	CONGENITAL SYPHILIS, UNSPECIFIED	IMMUNOLOGY	X	X	X	X
0910	GENITAL SYPHILIS (PRIMARY)	IMMUNOLOGY	X	X	X	X
0911	PRIMARY ANAL SYPHILIS	IMMUNOLOGY	X	X	X	X
0912	OTHER PRIMARY SYPHILIS	IMMUNOLOGY	X	X	X	X
0913	SECONDARY SYPHILIS OF SKIN OR MUCOUS MEMBRANES	IMMUNOLOGY	X	X	X	X
0914	ADENOPATHY DUE TO SECONDARY SYPHILIS	IMMUNOLOGY	X	X	X	X
09150	SYPHILITIC UVEITIS, UNSPECIFIED	IMMUNOLOGY	X	X	X	X
09151	SYPHILITIC CHORIORETINITIS (SECONDARY)	IMMUNOLOGY	X	X	X	X
09152	SYPHILITIC IRIDOCYCLITIS (SECONDARY)	IMMUNOLOGY	X	X	X	X
09161	SECONDARY SYPHILITIC PERIOSTITIS	IMMUNOLOGY	X	X	X	X
09162	SECONDARY SYPHILITIC HEPATITIS	IMMUNOLOGY	X	X	X	X
09169	SECONDARY SYPHILIS OF OTHER VISCERA	IMMUNOLOGY	X	X	X	X
0917	SECONDARY SYPHILIS, RELAPSE	IMMUNOLOGY	X	X	X	X
09181	ACUTE SYPHILITIC MENINGITIS (SECONDARY)	IMMUNOLOGY	X	X	X	X
09182	SYPHILITIC ALOPECIA	IMMUNOLOGY	X	X	X	X
09189	OTHER FORMS OF SECONDARY SYPHILIS	IMMUNOLOGY	X	X	X	X
0919	UNSPECIFIED SECONDARY SYPHILIS	IMMUNOLOGY	X	X	X	X
0920	EARLY SYPHILIS, LATENT, SEROLOGICAL RELAPSE AFTER	IMMUNOLOGY	X	X	X	X
0929	EARLY SYPHILIS, LATENT, UNSPECIFIED	IMMUNOLOGY	X	X	X	X
0930	ANEURYSM OF AORTA, SPECIFIED AS SYPHILITIC	IMMUNOLOGY	X	X	X	X
0931	SYPHILITIC AORTITIS	IMMUNOLOGY	X	X	X	X
09320	SYPHILITIC ENDOCARDITIS OF VALVE, UNSPECIFIED	IMMUNOLOGY	X	X	X	X
09321	SYPHILITIC ENDOCARDITIS OF MITRAL VALVE	IMMUNOLOGY	X	X	X	X
09322	SYPHILITIC ENDOCARDITIS OF AORTIC VALVE	IMMUNOLOGY	X	X	X	X
09323	SYPHILITIC ENDOCARDITIS OF TRICUSPID VALVE	IMMUNOLOGY	X	X	X	X
09324	SYPHILITIC ENDOCARDITIS OF PULMONARY VALVE	IMMUNOLOGY	X	X	X	X
09381	SYPHILITIC PERICARDITIS	IMMUNOLOGY	X	X	X	X
09382	SYPHILITIC MYOCARDITIS	IMMUNOLOGY	X	X	X	X
09389	OTHER SPECIFIED CARDIOVASCULAR SYPHILIS	IMMUNOLOGY	X	X	X	X
0939	CARDIOVASCULAR SYPHILIS, UNSPECIFIED	IMMUNOLOGY	X	X	X	X
0940	TABES DORSALIS	IMMUNOLOGY	X	X	X	X
0941	GENERAL PARESIS	IMMUNOLOGY	X	X	X	X
0942	SYPHILITIC MENINGITIS	IMMUNOLOGY	X	X	X	X
0943	ASYMPTOMATIC NEUROSYPHILIS	IMMUNOLOGY	X	X	X	X
09481	SYPHILITIC ENCEPHALITIS	IMMUNOLOGY	X	X	X	X
09482	SYPHILITIC PARKINSONISM	IMMUNOLOGY	X	X	X	X
09483	SYPHILITIC DISSEMINATED RETINOCHOROIDITIS	IMMUNOLOGY	X	X	X	X
09484	SYPHILITIC OPTIC ATROPHY	IMMUNOLOGY	X	X	X	X
09485	SYPHILITIC RETROBULBAR NEURITIS	IMMUNOLOGY	X	X	X	X
09486	SYPHILITIC ACOUSTIC NEURITIS	IMMUNOLOGY	X	X	X	X
09487	SYPHILITIC RUPTURED CEREBRAL ANEURYSM	IMMUNOLOGY	X	X	X	X
09489	OTHER SPECIFIED NEUROSYPHILIS	IMMUNOLOGY	X	X	X	X
0949	NEUROSYPHILIS, UNSPECIFIED	IMMUNOLOGY	X	X	X	X
0950	SYPHILITIC EPISCLERITIS	IMMUNOLOGY	X	X	X	X
0951	SYPHILIS OF LUNG	IMMUNOLOGY	X	X	X	X
0952	SYPHILITIC PERITONITIS	IMMUNOLOGY	X	X	X	X
0953	SYPHILIS OF LIVER	IMMUNOLOGY	X	X	X	X
0954	SYPHILIS OF KIDNEY	IMMUNOLOGY	X	X	X	X
0955	SYPHILIS OF BONE	IMMUNOLOGY	X	X	X	X
0956	SYPHILIS OF MUSCLE	IMMUNOLOGY	X	X	X	X
0957	SYPHILIS OF SYNOVIUM, TENDON, AND BURSA	IMMUNOLOGY	X	X	X	X
0958	OTHER SPECIFIED FORMS OF LATE SYMPTOMATIC SYPHILIS	IMMUNOLOGY	X	X	X	X
0959	LATE SYMPTOMATIC SYPHILIS, UNSPECIFIED	IMMUNOLOGY	X	X	X	X
096	LATE SYPHILIS, LATENT	IMMUNOLOGY	X	X	X	X
0970	LATE SYPHILIS, UNSPECIFIED	IMMUNOLOGY	X	X	X	X
0971	LATENT SYPHILIS, UNSPECIFIED	IMMUNOLOGY	X	X	X	X
0979	SYPHILIS, UNSPECIFIED	IMMUNOLOGY	X	X	X	X
0980	GONOCOCCAL INFECTION (ACUTE) OF LOWER GENITOURINAR	IMMUNOLOGY	X	X	X	X
09810	GONOCOCCAL INFECTION (ACUTE) OF UPPER GENITOURINAR	IMMUNOLOGY	X	X	X	X
09811	GONOCOCCAL CYSTITIS (ACUTE)	IMMUNOLOGY	X	X	X	X
09812	GONOCOCCAL PROSTATITIS (ACUTE)	IMMUNOLOGY	X	X	X	X
09813	GONOCOCCAL EPIDIDYMO-ORCHITIS (ACUTE)	IMMUNOLOGY	X	X	X	X
09814	GONOCOCCAL SEMINAL VESICULITIS (ACUTE)	IMMUNOLOGY	X	X	X	X
09815	GONOCOCCAL CERVICITIS (ACUTE)	IMMUNOLOGY	X	X	X	X
09816	GONOCOCCAL ENDOMETRITIS (ACUTE)	IMMUNOLOGY	X	X	X	X
09817	GONOCOCCAL SALPINGITIS, SPECIFIED AS ACUTE	IMMUNOLOGY	X	X	X	X
09819	OTHER GONOCOCCAL INFECTION (ACUTE) OF UPPER GENITO	IMMUNOLOGY	X	X	X	X
0982	GONOCOCCAL INFECTION, CHRONIC, OF LOWER GENITOURIN	IMMUNOLOGY	X	X	X	X
09830	CHRONIC GONOCOCCAL INFECTION OF UPPER GENITOURINAR	IMMUNOLOGY	X	X	X	X
09831	GONOCOCCAL CYSTITIS, CHRONIC	IMMUNOLOGY	X	X	X	X
09832	GONOCOCCAL PROSTATITIS, CHRONIC	IMMUNOLOGY	X	X	X	X
09833	GONOCOCCAL EPIDIDYMO-ORCHITIS, CHRONIC	IMMUNOLOGY	X	X	X	X
09834	GONOCOCCAL SEMINAL VESICULITIS, CHRONIC	IMMUNOLOGY	X	X	X	X
09835	GONOCOCCAL CERVICITIS, CHRONIC	IMMUNOLOGY	X	X	X	X
09836	GONOCOCCAL ENDOMETRITIS, CHRONIC	IMMUNOLOGY	X	X	X	X
09837	GONOCOCCAL SALPINGITIS (CHRONIC)	IMMUNOLOGY	X	X	X	X
09839	OTHER CHRONIC GONOCOCCAL INFECTION OF UPPER GENITO	IMMUNOLOGY	X	X	X	X
09840	GONOCOCCAL CONJUNCTIVITIS (NEONATORUM)	IMMUNOLOGY	X	X	X	X
09841	GONOCOCCAL IRIDOCYCLITIS	IMMUNOLOGY	X	X	X	X
09842	GONOCOCCAL ENDOPHTHALMIA	IMMUNOLOGY	X	X	X	X
09843	GONOCOCCAL KERATITIS	IMMUNOLOGY	X	X	X	X
09849	OTHER GONOCOCCAL INFECTION OF EYE	IMMUNOLOGY	X	X	X	X
09850	GONOCOCCAL ARTHRITIS	IMMUNOLOGY	X	X	X	X
09851	GONOCOCCAL SYNOVITIS AND TENOSYNOVITIS	IMMUNOLOGY	X	X	X	X
09852	GONOCOCCAL BURSITIS	IMMUNOLOGY	X	X	X	X
09853	GONOCOCCAL SPONDYLITIS	IMMUNOLOGY	X	X	X	X
09859	OTHER GONOCOCCAL INFECTION OF JOINT	IMMUNOLOGY	X	X	X	X
0986	GONOCOCCAL INFECTION OF PHARYNX	IMMUNOLOGY	X	X	X	X
0987	GONOCOCCAL INFECTION OF ANUS AND RECTUM	IMMUNOLOGY	X	X	X	X
09881	GONOCOCCAL KERATOSIS (BLENNORRHAGICA)	IMMUNOLOGY	X	X	X	X
09882	GONOCOCCAL MENINGITIS	IMMUNOLOGY	X	X	X	X
09883	GONOCOCCAL PERICARDITIS	IMMUNOLOGY	X	X	X	X
09884	GONOCOCCAL ENDOCARDITIS	IMMUNOLOGY	X	X	X	X
09885	OTHER GONOCOCCAL HEART DISEASE	IMMUNOLOGY	X	X	X	X
09886	GONOCOCCAL PERITONITIS	IMMUNOLOGY	X	X	X	X
09889	GONOCOCCAL INFECTION OF OTHER SPECIFIED SITES	IMMUNOLOGY	X	X	X	X
0990	CHANCROID	IMMUNOLOGY	X	X	X	X
0991	LYMPHOGRANULOMA VENEREUM	IMMUNOLOGY	X	X	X	X
0992	GRANULOMA INGUINALE	IMMUNOLOGY	X	X	X	X
0993	REITER'S DISEASE	IMMUNOLOGY	X	X	X	X
09940	UNSPECIFIED NONGONOCOCCAL URETHRITIS [NGU]	IMMUNOLOGY	X	X	X	X
09941	VENEREAL URETHRITIS DUE TO CHLAMYDIA TRACHOMATIS	IMMUNOLOGY	X	X	X	X
09949	VENEREAL URETHRITIS DUE TO OTHER SPECIFIED ORGANIS	IMMUNOLOGY	X	X	X	X
09950	CHLAMYDIA TRACHOMATIS INFECTION OF UNSPECIFIED SIT	IMMUNOLOGY	X	X	X	X
09951	CHLAMYDIA TRACHOMATIS INFECTION OF PHARYNX	IMMUNOLOGY	X	X	X	X
09952	CHLAMYDIA TRACHOMATIS INFECTION OF ANUS AND RECTUM	IMMUNOLOGY	X	X	X	X
09953	CHLAMYDIA TRACHOMATIS INFECTION OF LOWER GENITOURI	IMMUNOLOGY	X	X	X	X
09954	CHLAMYDIA TRACHOMATIS INFECTION OF OTHER GENITOURI	IMMUNOLOGY	X	X	X	X
09955	CHLAMYDIA TRACHOMATIS INFECTION OF UNSPECIFIED GEN	IMMUNOLOGY	X	X	X	X
09956	CHLAMYDIA TRACHOMATIS INFECTION OF PERITONEUM	IMMUNOLOGY	X	X	X	X
09959	CHLAMYDIA TRACHOMATIS INFECTION OF OTHER SPECIFIED	IMMUNOLOGY	X	X	X	X
0998	OTHER SPECIFIED VENEREAL DISEASES	IMMUNOLOGY	X	X	X	X
0999	VENEREAL DISEASE, UNSPECIFIED	IMMUNOLOGY	X	X	X	X
1000	LEPTOSPIROSIS ICTEROHEMORRHAGICA	IMMUNOLOGY	X	X	X	X
10081	LEPTOSPIRAL MENINGITIS (ASEPTIC)	IMMUNOLOGY	X	X	X	X
10089	OTHER SPECIFIED LEPTOSPIRAL INFECTIONS	IMMUNOLOGY	X	X	X	X
1009	LEPTOSPIROSIS, UNSPECIFIED	IMMUNOLOGY	X	X	X	X
101	VINCENT'S ANGINA	IMMUNOLOGY	X	X	X	X
1020	INITIAL LESIONS OF YAWS	IMMUNOLOGY	X	X	X	X
1021	MULTIPLE PAPILLOMATA DUE TO YAWS AND WET CRAB YAWS	IMMUNOLOGY	X	X	X	X
1022	OTHER EARLY SKIN LESIONS OF YAWS	IMMUNOLOGY	X	X	X	X
1023	HYPERKERATOSIS DUE TO YAWS	IMMUNOLOGY	X	X	X	X
1024	GUMMATA AND ULCERS DUE TO YAWS	IMMUNOLOGY	X	X	X	X
1025	GANGOSA	IMMUNOLOGY	X	X	X	X
1026	BONE AND JOINT LESIONS DUE TO YAWS	IMMUNOLOGY	X	X	X	X
1027	OTHER MANIFESTATIONS OF YAWS	IMMUNOLOGY	X	X	X	X
1028	LATENT YAWS	IMMUNOLOGY	X	X	X	X
1029	YAWS, UNSPECIFIED	IMMUNOLOGY	X	X	X	X
1030	PRIMARY LESIONS OF PINTA	IMMUNOLOGY	X	X	X	X
1031	INTERMEDIATE LESIONS OF PINTA	IMMUNOLOGY	X	X	X	X
1032	LATE LESIONS OF PINTA	IMMUNOLOGY	X	X	X	X
1033	MIXED LESIONS OF PINTA	IMMUNOLOGY	X	X	X	X
1039	PINTA, UNSPECIFIED	IMMUNOLOGY	X	X	X	X
1040	NONVENEREAL ENDEMIC SYPHILIS	IMMUNOLOGY	X	X	X	X
1048	OTHER SPECIFIED SPIROCHETAL INFECTIONS	IMMUNOLOGY	X	X	X	X
1049	SPIROCHETAL INFECTION, UNSPECIFIED	IMMUNOLOGY	X	X	X	X
1100	DERMATOPHYTOSIS OF SCALP AND BEARD	IMMUNOLOGY	X	X	X	X
1101	DERMATOPHYTOSIS OF NAIL	IMMUNOLOGY	X	X	X	X
1102	DERMATOPHYTOSIS OF HAND	IMMUNOLOGY	X	X	X	X
1103	DERMATOPHYTOSIS OF GROIN AND PERIANAL AREA	IMMUNOLOGY	X	X	X	X
1104	DERMATOPHYTOSIS OF FOOT	IMMUNOLOGY	X	X	X	X
1105	DERMATOPHYTOSIS OF THE BODY	IMMUNOLOGY	X	X	X	X
1106	DEEP SEATED DERMATOPHYTOSIS	IMMUNOLOGY	X	X	X	X
1108	DERMATOPHYTOSIS OF OTHER SPECIFIED SITES	IMMUNOLOGY	X	X	X	X
1109	DERMATOPHYTOSIS OF UNSPECIFIED SITE	IMMUNOLOGY	X	X	X	X
1110	PITYRIASIS VERSICOLOR	IMMUNOLOGY	X	X	X	X
1111	TINEA NIGRA	IMMUNOLOGY	X	X	X	X
1112	TINEA BLANCA	IMMUNOLOGY	X	X	X	X
1113	BLACK PIEDRA	IMMUNOLOGY	X	X	X	X
1118	OTHER SPECIFIED DERMATOMYCOSES	IMMUNOLOGY	X	X	X	X
1119	DERMATOMYCOSIS, UNSPECIFIED	IMMUNOLOGY	X	X	X	X
1120	CANDIDIASIS OF MOUTH	IMMUNOLOGY	X	X	X	X
1121	CANDIDIASIS OF VULVA AND VAGINA	IMMUNOLOGY	X	X	X	X
1122	CANDIDIASIS OF OTHER UROGENITAL SITES	IMMUNOLOGY	X	X	X	X
1123	CANDIDIASIS OF SKIN AND NAILS	IMMUNOLOGY	X	X	X	X
1124	CANDIDIASIS OF LUNG	IMMUNOLOGY	X	X	X	X
1125	DISSEMINATED CANDIDIASIS	IMMUNOLOGY	X	X	X	X
11281	CANDIDAL ENDOCARDITIS	IMMUNOLOGY	X	X	X	X
11282	CANDIDAL OTITIS EXTERNA	IMMUNOLOGY	X	X	X	X
11283	CANDIDAL MENINGITIS	IMMUNOLOGY	X	X	X	X
11284	CANDIDIASIS OF THE ESOPHAGUS	IMMUNOLOGY	X	X	X	X
11285	CANDIDIASIS OF THE INTESTINE	IMMUNOLOGY	X	X	X	X
11289	OTHER CANDIDIASIS OF OTHER SPECIFIED SITES	IMMUNOLOGY	X	X	X	X
1129	CANDIDIASIS OF UNSPECIFIED SITE	IMMUNOLOGY	X	X	X	X
1140	PRIMARY COCCIDIOIDOMYCOSIS (PULMONARY)	IMMUNOLOGY	X	X	X	X
1141	PRIMARY EXTRAPULMONARY COCCIDIOIDOMYCOSIS	IMMUNOLOGY	X	X	X	X
1142	COCCIDIOIDAL MENINGITIS	IMMUNOLOGY	X	X	X	X
1143	OTHER FORMS OF PROGRESSIVE COCCIDIOIDOMYCOSIS	IMMUNOLOGY	X	X	X	X
1144	CHRONIC PULMONARY COCCIDIOIDOMYCOSIS	IMMUNOLOGY	X	X	X	X
1145	PULMONARY COCCIDIOIDOMYCOSIS, UNSPECIFIED	IMMUNOLOGY	X	X	X	X
1149	COCCIDIOIDOMYCOSIS, UNSPECIFIED	IMMUNOLOGY	X	X	X	X
11500	INFECTION BY HISTOPLASMA CAPSULATUM, WITHOUT MENTI	IMMUNOLOGY	X	X	X	X
11501	HISTOPLASMA CAPSULATUM MENINGITIS	IMMUNOLOGY	X	X	X	X
11502	HISTOPLASMA CAPSULATUM RETINITIS	IMMUNOLOGY	X	X	X	X
11503	HISTOPLASMA CAPSULATUM PERICARDITIS	IMMUNOLOGY	X	X	X	X
11504	HISTOPLASMA CAPSULATUM ENDOCARDITIS	IMMUNOLOGY	X	X	X	X
11505	HISTOPLASMA CAPSULATUM PNEUMONIA	IMMUNOLOGY	X	X	X	X
11509	INFECTION BY HISTOPLASMA CAPSULATUM, WITH MENTION	IMMUNOLOGY	X	X	X	X
11510	INFECTION BY HISTOPLASMA DUBOISII, WITHOUT MENTION	IMMUNOLOGY	X	X	X	X
11511	HISTOPLASMA DUBOISII MENINGITIS	IMMUNOLOGY	X	X	X	X
11512	HISTOPLASMA DUBOISII RETINITIS	IMMUNOLOGY	X	X	X	X
11513	HISTOPLASMA DUBOISII PERICARDITIS	IMMUNOLOGY	X	X	X	X
11514	HISTOPLASMA DUBOISII ENDOCARDITIS	IMMUNOLOGY	X	X	X	X
11515	HISTOPLASMA DUBOISII PNEUMONIA	IMMUNOLOGY	X	X	X	X
11519	INFECTION BY HISTOPLASMA DUBOISII WITH MENTION OF	IMMUNOLOGY	X	X	X	X
11590	HISTOPLASMOSIS, UNSPECIFIED WITHOUT MENTION OF MAN	IMMUNOLOGY	X	X	X	X
11591	HISTOPLASMOSIS MENINGITIS	IMMUNOLOGY	X	X	X	X
11592	HISTOPLASMOSIS RETINITIS	IMMUNOLOGY	X	X	X	X
11593	HISTOPLASMOSIS PERICARDITIS	IMMUNOLOGY	X	X	X	X
11594	HISTOPLASMOSIS ENDOCARDITIS	IMMUNOLOGY	X	X	X	X
11595	HISTOPLASMOSIS PNEUMONIA	IMMUNOLOGY	X	X	X	X
11599	HISTOPLASMOSIS, UNSPECIFIED WITH MENTION OF OTHER	IMMUNOLOGY	X	X	X	X
1160	BLASTOMYCOSIS	IMMUNOLOGY	X	X	X	X
1161	PARACOCCIDIOIDOMYCOSIS	IMMUNOLOGY	X	X	X	X
1162	LOBOMYCOSIS	IMMUNOLOGY	X	X	X	X
1170	RHINOSPORIDIOSIS	IMMUNOLOGY	X	X	X	X
1171	SPOROTRICHOSIS	IMMUNOLOGY	X	X	X	X
1172	CHROMOBLASTOMYCOSIS	IMMUNOLOGY	X	X	X	X
1173	ASPERGILLOSIS	IMMUNOLOGY	X	X	X	X
1174	MYCOTIC MYCETOMAS	IMMUNOLOGY	X	X	X	X
1175	CRYPTOCOCCOSIS	IMMUNOLOGY	X	X	X	X
1176	ALLESCHERIOSIS [PETRIELLIDOSIS]	IMMUNOLOGY	X	X	X	X
1177	ZYGOMYCOSIS [PHYCOMYCOSIS OR MUCORMYCOSIS]	IMMUNOLOGY	X	X	X	X
1178	INFECTION BY DEMATIACIOUS FUNGI [PHAEHYPHOMYCOSIS]	IMMUNOLOGY	X	X	X	X
1179	OTHER AND UNSPECIFIED MYCOSES	IMMUNOLOGY	X	X	X	X
118	OPPORTUNISTIC MYCOSES	IMMUNOLOGY	X	X	X	X
1200	SCHISTOSOMIASIS DUE TO SCHISTOSOMA HAEMATOBIUM	IMMUNOLOGY	X	X	X	X
1201	SCHISTOSOMIASIS DUE TO SCHISTOSOMA MANSONI	IMMUNOLOGY	X	X	X	X
1202	SCHISTOSOMIASIS DUE TO SCHISTOSOMA JAPONICUM	IMMUNOLOGY	X	X	X	X
1203	CUTANEOUS SCHISTOSOMIASIS	IMMUNOLOGY	X	X	X	X
1208	OTHER SPECIFIED SCHISTOSOMIASIS	IMMUNOLOGY	X	X	X	X
1209	SCHISTOSOMIASIS, UNSPECIFIED	IMMUNOLOGY	X	X	X	X
1210	OPISTHORCHIASIS	IMMUNOLOGY	X	X	X	X
1211	CLONORCHIASIS	IMMUNOLOGY	X	X	X	X
1212	PARAGONIMIASIS	IMMUNOLOGY	X	X	X	X
1213	FASCIOLIASIS	IMMUNOLOGY	X	X	X	X
1214	FASCIOLOPSIASIS	IMMUNOLOGY	X	X	X	X
1215	METAGONIMIASIS	IMMUNOLOGY	X	X	X	X
1216	HETEROPHYIASIS	IMMUNOLOGY	X	X	X	X
1218	OTHER SPECIFIED TREMATODE INFECTIONS	IMMUNOLOGY	X	X	X	X
1219	TREMATODE INFECTION, UNSPECIFIED	IMMUNOLOGY	X	X	X	X
1220	ECHINOCOCCUS GRANULOSUS INFECTION OF LIVER	IMMUNOLOGY	X	X	X	X
1221	ECHINOCOCCUS GRANULOSUS INFECTION OF LUNG	IMMUNOLOGY	X	X	X	X
1222	ECHINOCOCCUS GRANULOSUS INFECTION OF THYROID	IMMUNOLOGY	X	X	X	X
1223	ECHINOCOCCUS GRANULOSUS INFECTION, OTHER	IMMUNOLOGY	X	X	X	X
1224	ECHINOCOCCUS GRANULOSUS INFECTION, UNSPECIFIED	IMMUNOLOGY	X	X	X	X
1225	ECHINOCOCCUS MULTILOCULARIS INFECTION OF LIVER	IMMUNOLOGY	X	X	X	X
1226	ECHINOCOCCUS MULTILOCULARIS INFECTION, OTHER	IMMUNOLOGY	X	X	X	X
1227	ECHINOCOCCUS MULTILOCULARIS INFECTION, UNSPECIFIED	IMMUNOLOGY	X	X	X	X
1228	ECHINOCOCCOSIS, UNSPECIFIED, OF LIVER	IMMUNOLOGY	X	X	X	X
1229	ECHINOCOCCOSIS, OTHER AND UNSPECIFIED	IMMUNOLOGY	X	X	X	X
1230	TAENIA SOLIUM INFECTION, INTESTINAL FORM	IMMUNOLOGY	X	X	X	X
1231	CYSTICERCOSIS	IMMUNOLOGY	X	X	X	X
1232	TAENIA SAGINATA INFECTION	IMMUNOLOGY	X	X	X	X
1233	TAENIASIS, UNSPECIFIED	IMMUNOLOGY	X	X	X	X
1234	DIPHYLLOBOTHRIASIS, INTESTINAL	IMMUNOLOGY	X	X	X	X
1235	SPARGANOSIS [LARVAL DIPHYLLOBOTHRIASIS]	IMMUNOLOGY	X	X	X	X
1236	HYMENOLEPIASIS	IMMUNOLOGY	X	X	X	X
1238	OTHER SPECIFIED CESTODE INFECTION	IMMUNOLOGY	X	X	X	X
1239	CESTODE INFECTION, UNSPECIFIED	IMMUNOLOGY	X	X	X	X
124	TRICHINOSIS	IMMUNOLOGY	X	X	X	X
1250	BANCROFTIAN FILARIASIS	IMMUNOLOGY	X	X	X	X
1251	MALAYAN FILARIASIS	IMMUNOLOGY	X	X	X	X
1252	LOIASIS	IMMUNOLOGY	X	X	X	X
1253	ONCHOCERCIASIS	IMMUNOLOGY	X	X	X	X
1254	DIPETALONEMIASIS	IMMUNOLOGY	X	X	X	X
1255	MANSONELLA OZZARDI INFECTION	IMMUNOLOGY	X	X	X	X
1256	OTHER SPECIFIED FILARIASIS	IMMUNOLOGY	X	X	X	X
1257	DRACONTIASIS	IMMUNOLOGY	X	X	X	X
1259	UNSPECIFIED FILARIASIS	IMMUNOLOGY	X	X	X	X
1260	ANCYLOSTOMIASIS DUE TO ANCYLOSTOMA DUODENALE	IMMUNOLOGY	X	X	X	X
1261	NECATORIASIS DUE TO NECATOR AMERICANUS	IMMUNOLOGY	X	X	X	X
1262	ANCYLOSTOMIASIS DUE TO ANCYLOSTOMA BRAZILIENSE	IMMUNOLOGY	X	X	X	X
1263	ANCYLOSTOMIASIS DUE TO ANCYLOSTOMA CEYLANICUM	IMMUNOLOGY	X	X	X	X
1268	OTHER SPECIFIED ANCYLOSTOMA	IMMUNOLOGY	X	X	X	X
1269	ANCYLOSTOMIASIS AND NECATORIASIS, UNSPECIFIED	IMMUNOLOGY	X	X	X	X
1270	ASCARIASIS	IMMUNOLOGY	X	X	X	X
1271	ANISAKIASIS	IMMUNOLOGY	X	X	X	X
1272	STRONGYLOIDIASIS	IMMUNOLOGY	X	X	X	X
1273	TRICHURIASIS	IMMUNOLOGY	X	X	X	X
1274	ENTEROBIASIS	IMMUNOLOGY	X	X	X	X
1275	CAPILLARIASIS	IMMUNOLOGY	X	X	X	X
1276	TRICHOSTRONGYLIASIS	IMMUNOLOGY	X	X	X	X
1277	OTHER SPECIFIED INTESTINAL HELMINTHIASIS	IMMUNOLOGY	X	X	X	X
1278	MIXED INTESTINAL HELMINTHIASIS	IMMUNOLOGY	X	X	X	X
1279	INTESTINAL HELMINTHIASIS, UNSPECIFIED	IMMUNOLOGY	X	X	X	X
1280	TOXOCARIASIS	IMMUNOLOGY	X	X	X	X
1281	GNATHOSTOMIASIS	IMMUNOLOGY	X	X	X	X
1288	OTHER SPECIFIED HELMINTHIASIS	IMMUNOLOGY	X	X	X	X
1289	HELMINTH INFECTION, UNSPECIFIED	IMMUNOLOGY	X	X	X	X
129	INTESTINAL PARASITISM, UNSPECIFIED	IMMUNOLOGY	X	X	X	X
1300	MENINGOENCEPHALITIS DUE TO TOXOPLASMOSIS	IMMUNOLOGY	X	X	X	X
1301	CONJUNCTIVITIS DUE TO TOXOPLASMOSIS	IMMUNOLOGY	X	X	X	X
1302	CHORIORETINITIS DUE TO TOXOPLASMOSIS	IMMUNOLOGY	X	X	X	X
1303	MYOCARDITIS DUE TO TOXOPLASMOSIS	IMMUNOLOGY	X	X	X	X
1304	PNEUMONITIS DUE TO TOXOPLASMOSIS	IMMUNOLOGY	X	X	X	X
1305	HEPATITIS DUE TO TOXOPLASMOSIS	IMMUNOLOGY	X	X	X	X
1307	TOXOPLASMOSIS OF OTHER SPECIFIED SITES	IMMUNOLOGY	X	X	X	X
1308	MULTISYSTEMIC DISSEMINATED TOXOPLASMOSIS	IMMUNOLOGY	X	X	X	X
1309	TOXOPLASMOSIS, UNSPECIFIED	IMMUNOLOGY	X	X	X	X
13100	UROGENITAL TRICHOMONIASIS, UNSPECIFIED	IMMUNOLOGY	X	X	X	X
13101	TRICHOMONAL VULVOVAGINITIS	IMMUNOLOGY	X	X	X	X
13102	TRICHOMONAL URETHRITIS	IMMUNOLOGY	X	X	X	X
13103	TRICHOMONAL PROSTATITIS	IMMUNOLOGY	X	X	X	X
13109	OTHER UROGENITAL TRICHOMONIASIS	IMMUNOLOGY	X	X	X	X
1318	TRICHOMONIASIS OF OTHER SPECIFIED SITES	IMMUNOLOGY	X	X	X	X
1319	TRICHOMONIASIS, UNSPECIFIED	IMMUNOLOGY	X	X	X	X
1320	PEDICULUS CAPITIS [HEAD LOUSE]	IMMUNOLOGY	X	X	X	X
1321	PEDICULUS CORPORIS [BODY LOUSE]	IMMUNOLOGY	X	X	X	X
1322	PHTHIRUS PUBIS [PUBIC LOUSE]	IMMUNOLOGY	X	X	X	X
1323	MIXED PEDICULOSIS INFESTATION	IMMUNOLOGY	X	X	X	X
1329	PEDICULOSIS, UNSPECIFIED	IMMUNOLOGY	X	X	X	X
1330	SCABIES	IMMUNOLOGY	X	X	X	X
1338	OTHER ACARIASIS	IMMUNOLOGY	X	X	X	X
1339	ACARIASIS, UNSPECIFIED	IMMUNOLOGY	X	X	X	X
1340	MYIASIS	IMMUNOLOGY	X	X	X	X
1341	OTHER ARTHROPOD INFESTATION	IMMUNOLOGY	X	X	X	X
1342	HIRUDINIASIS	IMMUNOLOGY	X	X	X	X
1348	OTHER SPECIFIED INFESTATIONS	IMMUNOLOGY	X	X	X	X
1349	INFESTATION, UNSPECIFIED	IMMUNOLOGY	X	X	X	X
135	SARCOIDOSIS	IMMUNOLOGY	X	X	X	X
136	INF/PARASITE DIS NEC/NOS	IMMUNOLOGY	X
1360	AINHUM	IMMUNOLOGY	X	X	X	X
1361	BEHCET'S SYNDROME	IMMUNOLOGY	X	X	X	X
1362	FREE-LIVING AMEBA INFECT	IMMUNOLOGY	X
13621	SPECIFIC INFECTION DUE TO ACANTHAMOEBA	IMMUNOLOGY	X	X	X	X
13629	OTHER SPECIFIC INFECTIONS BY FREE-LIVING AMEBAE	IMMUNOLOGY	X	X	X	X
1363	PNEUMOCYSTOSIS	IMMUNOLOGY	X	X	X	X
1364	PSOROSPERMIASIS	IMMUNOLOGY	X	X	X	X
1365	SARCOSPORIDIOSIS	IMMUNOLOGY	X	X	X	X
1368	OTHER SPECIFIED INFECTIOUS AND PARASITIC DISEASES	IMMUNOLOGY	X	X	X	X
1369	UNSPECIFIED INFECTIOUS AND PARASITIC DISEASES	IMMUNOLOGY	X	X	X	X
1370	LATE EFFECTS OF RESPIRATORY OR UNSPECIFIED TUBERCU	IMMUNOLOGY	X	X	X	X
1371	LATE EFFECTS OF CENTRAL NERVOUS SYSTEM TUBERCULOSI	IMMUNOLOGY	X	X	X	X
1372	LATE EFFECTS OF GENITOURINARY TUBERCULOSIS	IMMUNOLOGY	X	X	X	X
1373	LATE EFFECTS OF TUBERCULOSIS OF BONES AND JOINTS	IMMUNOLOGY	X	X	X	X
1374	LATE EFFECTS OF TUBERCULOSIS OF OTHER SPECIFIED OR	IMMUNOLOGY	X	X	X	X
138	LATE EFFECTS OF ACUTE POLIOMYELITIS	IMMUNOLOGY	X	X	X	X
1390	LATE EFFECTS OF VIRAL ENCEPHALITIS	IMMUNOLOGY	X	X	X	X
1391	LATE EFFECTS OF TRACHOMA	IMMUNOLOGY	X	X	X	X
1398	LATE EFFECTS OF OTHER AND UNSPECIFIED INFECTIOUS A	IMMUNOLOGY	X	X	X	X
2400	GOITER, SPECIFIED AS SIMPLE	ENDOCRINE	X	X	X	X
2409	GOITER, UNSPECIFIED	ENDOCRINE	X	X	X	X
2410	NONTOXIC UNINODULAR GOITER	ENDOCRINE	X	X	X	X
2411	NONTOXIC MULTINODULAR GOITER	ENDOCRINE	X	X	X	X
2419	UNSPECIFIED NONTOXIC NODULAR GOITER	ENDOCRINE	X	X	X	X
24200	TOXIC DIFFUSE GOITER WITHOUT MENTION OF THYROTOXIC	ENDOCRINE	X	X	X	X
24201	TOXIC DIFFUSE GOITER WITH MENTION OF THYROTOXIC CR	ENDOCRINE	X	X	X	X
24210	TOXIC UNINODULAR GOITER WITHOUT MENTION OF THYROTO	ENDOCRINE	X	X	X	X
24211	TOXIC UNINODULAR GOITER WITH MENTION OF THYROTOXIC	ENDOCRINE	X	X	X	X
24220	TOXIC MULTINODULAR GOITER WITHOUT MENTION OF THYRO	ENDOCRINE	X	X	X	X
24221	TOXIC MULTINODULAR GOITER WITH MENTION OF THYROTOX	ENDOCRINE	X	X	X	X
24230	TOXIC NODULAR GOITER, UNSPECIFIED TYPE, WITHOUT ME	ENDOCRINE	X	X	X	X
24231	TOXIC NODULAR GOITER, UNSPECIFIED TYPE, WITH MENTI	ENDOCRINE	X	X	X	X
24240	THYROTOXICOSIS FROM ECTOPIC THYROID NODULE WITHOUT	ENDOCRINE	X	X	X	X
24241	THYROTOXICOSIS FROM ECTOPIC THYROID NODULE WITH ME	ENDOCRINE	X	X	X	X
24280	THYROTOXICOSIS OF OTHER SPECIFIED ORIGIN WITHOUT M	ENDOCRINE	X	X	X	X
24281	THYROTOXICOSIS OF OTHER SPECIFIED ORIGIN WITH MENT	ENDOCRINE	X	X	X	X
24290	THYROTOXICOSIS WITHOUT MENTION OF GOITER OR OTHER	ENDOCRINE	X	X	X	X
24291	THYROTOXICOSIS WITHOUT MENTION OF GOITER OR OTHER	ENDOCRINE	X	X	X	X
243	CONGENITAL HYPOTHYROIDISM	ENDOCRINE	X	X	X	X
2440	POSTSURGICAL HYPOTHYROIDISM	ENDOCRINE	X	X	X	X
2441	OTHER POSTABLATIVE HYPOTHYROIDISM	ENDOCRINE	X	X	X	X
2442	IODINE HYPOTHYROIDISM	ENDOCRINE	X	X	X	X
2443	OTHER IATROGENIC HYPOTHYROIDISM	ENDOCRINE	X	X	X	X
2448	OTHER SPECIFIED ACQUIRED HYPOTHYROIDISM	ENDOCRINE	X	X	X	X
2449	UNSPECIFIED HYPOTHYROIDISM	ENDOCRINE	X	X	X	X
2450	ACUTE THYROIDITIS	ENDOCRINE	X	X	X	X
2451	SUBACUTE THYROIDITIS	ENDOCRINE	X	X	X	X
2452	CHRONIC LYMPHOCYTIC THYROIDITIS	ENDOCRINE	X	X	X	X
2453	CHRONIC FIBROUS THYROIDITIS	ENDOCRINE	X	X	X	X
2454	IATROGENIC THYROIDITIS	ENDOCRINE	X	X	X	X
2458	OTHER AND UNSPECIFIED CHRONIC THYROIDITIS	ENDOCRINE	X	X	X	X
2459	THYROIDITIS, UNSPECIFIED	ENDOCRINE	X	X	X	X
2460	DISORDERS OF THYROCALCITONIN SECRETION	ENDOCRINE	X	X	X	X
2461	DYSHORMONOGENIC GOITER	ENDOCRINE	X	X	X	X
2462	CYST OF THYROID	ENDOCRINE	X	X	X	X
2463	HEMORRHAGE AND INFARCTION OF THYROID	ENDOCRINE	X	X	X	X
2468	OTHER SPECIFIED DISORDERS OF THYROID	ENDOCRINE	X	X	X	X
2469	UNSPECIFIED DISORDER OF THYROID	ENDOCRINE	X	X	X	X
24900	SECONDARY DIABETES MELLITUS WITHOUT MENTION OF COM	ENDOCRINE	X	X	X	X
24901	SECONDARY DIABETES MELLITUS WITHOUT MENTION OF COM	ENDOCRINE	X	X	X	X
24910	SECONDARY DIABETES MELLITUS WITH KETOACIDOSIS, NOT	ENDOCRINE	X	X	X	X
24911	SECONDARY DIABETES MELLITUS WITH KETOACIDOSIS, UNC	ENDOCRINE	X	X	X	X
24920	SECONDARY DIABETES MELLITUS WITH HYPEROSMOLARITY,	ENDOCRINE	X	X	X	X
24921	SECONDARY DIABETES MELLITUS WITH HYPEROSMOLARITY,	ENDOCRINE	X	X	X	X
24930	SECONDARY DIABETES MELLITUS WITH OTHER COMA, NOT S	ENDOCRINE	X	X	X	X
24931	SECONDARY DIABETES MELLITUS WITH OTHER COMA, UNCON	ENDOCRINE	X	X	X	X
24940	SECONDARY DIABETES MELLITUS WITH RENAL MANIFESTATI	ENDOCRINE	X	X	X	X
24941	SECONDARY DIABETES MELLITUS WITH RENAL MANIFESTATI	ENDOCRINE	X	X	X	X
24950	SECONDARY DIABETES MELLITUS WITH OPHTHALMIC MANIFE	ENDOCRINE	X	X	X	X
24951	SECONDARY DIABETES MELLITUS WITH OPHTHALMIC MANIFE	ENDOCRINE	X	X	X	X
24960	SECONDARY DIABETES MELLITUS WITH NEUROLOGICAL MANI	ENDOCRINE	X	X	X	X
24961	SECONDARY DIABETES MELLITUS WITH NEUROLOGICAL MANI	ENDOCRINE	X	X	X	X
24970	SECONDARY DIABETES MELLITUS WITH PERIPHERAL CIRCUL	ENDOCRINE	X	X	X	X
24971	SECONDARY DIABETES MELLITUS WITH PERIPHERAL CIRCUL	ENDOCRINE	X	X	X	X
24980	SECONDARY DIABETES MELLITUS WITH OTHER SPECIFIED M	ENDOCRINE	X	X	X	X
24981	SECONDARY DIABETES MELLITUS WITH OTHER SPECIFIED M	ENDOCRINE	X	X	X	X
24990	SECONDARY DIABETES MELLITUS WITH UNSPECIFIED COMPL	ENDOCRINE	X	X	X	X
24991	SECONDARY DIABETES MELLITUS WITH UNSPECIFIED COMPL	ENDOCRINE	X	X	X	X
25000	DIABETES MELLITUS WITHOUT MENTION OF COMPLICATION,	ENDOCRINE	X	X	X	X
25001	DIABETES MELLITUS WITHOUT MENTION OF COMPLICATION,	ENDOCRINE	X	X	X	X
25002	DIABETES MELLITUS WITHOUT MENTION OF COMPLICATION,	ENDOCRINE	X	X	X	X
25003	DIABETES MELLITUS WITHOUT MENTION OF COMPLICATION,	ENDOCRINE	X	X	X	X
25010	DIABETES WITH KETOACIDOSIS, TYPE II OR UNSPECIFIED	ENDOCRINE	X	X	X	X
25011	DIABETES WITH KETOACIDOSIS, TYPE I [JUVENILE TYPE]	ENDOCRINE	X	X	X	X
25012	DIABETES WITH KETOACIDOSIS, TYPE II OR UNSPECIFIED	ENDOCRINE	X	X	X	X
25013	DIABETES WITH KETOACIDOSIS, TYPE I [JUVENILE TYPE]	ENDOCRINE	X	X	X	X
25020	DIABETES WITH HYPEROSMOLARITY, TYPE II OR UNSPECIF	ENDOCRINE	X	X	X	X
25021	DIABETES WITH HYPEROSMOLARITY, TYPE I [JUVENILE TY	ENDOCRINE	X	X	X	X
25022	DIABETES WITH HYPEROSMOLARITY, TYPE II OR UNSPECIF	ENDOCRINE	X	X	X	X
25023	DIABETES WITH HYPEROSMOLARITY, TYPE I [JUVENILE TY	ENDOCRINE	X	X	X	X
25030	DIABETES WITH OTHER COMA, TYPE II OR UNSPECIFIED T	ENDOCRINE	X	X	X	X
25031	DIABETES WITH OTHER COMA, TYPE I [JUVENILE TYPE],	ENDOCRINE	X	X	X	X
25032	DIABETES WITH OTHER COMA, TYPE II OR UNSPECIFIED T	ENDOCRINE	X	X	X	X
25033	DIABETES WITH OTHER COMA, TYPE I [JUVENILE TYPE],	ENDOCRINE	X	X	X	X
25040	DIABETES WITH RENAL MANIFESTATIONS, TYPE II OR UNS	ENDOCRINE	X	X	X	X
25041	DIABETES WITH RENAL MANIFESTATIONS, TYPE I [JUVENI	ENDOCRINE	X	X	X	X
25042	DIABETES WITH RENAL MANIFESTATIONS, TYPE II OR UNS	ENDOCRINE	X	X	X	X
25043	DIABETES WITH RENAL MANIFESTATIONS, TYPE I [JUVENI	ENDOCRINE	X	X	X	X
25050	DIABETES WITH OPHTHALMIC MANIFESTATIONS, TYPE II O	ENDOCRINE	X	X	X	X
25051	DIABETES WITH OPHTHALMIC MANIFESTATIONS, TYPE I [J	ENDOCRINE	X	X	X	X
25052	DIABETES WITH OPHTHALMIC MANIFESTATIONS, TYPE II O	ENDOCRINE	X	X	X	X
25053	DIABETES WITH OPHTHALMIC MANIFESTATIONS, TYPE I [J	ENDOCRINE	X	X	X	X
25060	DIABETES WITH NEUROLOGICAL MANIFESTATIONS, TYPE II	ENDOCRINE	X	X	X	X
25061	DIABETES WITH NEUROLOGICAL MANIFESTATIONS, TYPE I	ENDOCRINE	X	X	X	X
25062	DIABETES WITH NEUROLOGICAL MANIFESTATIONS, TYPE II	ENDOCRINE	X	X	X	X
25063	DIABETES WITH NEUROLOGICAL MANIFESTATIONS, TYPE I	ENDOCRINE	X	X	X	X
25070	DIABETES WITH PERIPHERAL CIRCULATORY DISORDERS, TY	ENDOCRINE	X	X	X	X
25071	DIABETES WITH PERIPHERAL CIRCULATORY DISORDERS, TY	ENDOCRINE	X	X	X	X
25072	DIABETES WITH PERIPHERAL CIRCULATORY DISORDERS, TY	ENDOCRINE	X	X	X	X
25073	DIABETES WITH PERIPHERAL CIRCULATORY DISORDERS, TY	ENDOCRINE	X	X	X	X
25080	DIABETES WITH OTHER SPECIFIED MANIFESTATIONS, TYPE	ENDOCRINE	X	X	X	X
25081	DIABETES WITH OTHER SPECIFIED MANIFESTATIONS, TYPE	ENDOCRINE	X	X	X	X
25082	DIABETES WITH OTHER SPECIFIED MANIFESTATIONS, TYPE	ENDOCRINE	X	X	X	X
25083	DIABETES WITH OTHER SPECIFIED MANIFESTATIONS, TYPE	ENDOCRINE	X	X	X	X
25090	DIABETES WITH UNSPECIFIED COMPLICATION, TYPE II OR	ENDOCRINE	X	X	X	X
25091	DIABETES WITH UNSPECIFIED COMPLICATION, TYPE I [JU	ENDOCRINE	X	X	X	X
25092	DIABETES WITH UNSPECIFIED COMPLICATION, TYPE II OR	ENDOCRINE	X	X	X	X
25093	DIABETES WITH UNSPECIFIED COMPLICATION, TYPE I [JU	ENDOCRINE	X	X	X	X
2510	HYPOGLYCEMIC COMA	ENDOCRINE	X	X	X	X
2511	OTHER SPECIFIED HYPOGLYCEMIA	ENDOCRINE	X	X	X	X
2512	HYPOGLYCEMIA, UNSPECIFIED	ENDOCRINE	X	X	X	X
2513	POSTSURGICAL HYPOINSULINEMIA	ENDOCRINE	X	X	X	X
2514	ABNORMALITY OF SECRETION OF GLUCAGON	ENDOCRINE	X	X	X	X
2515	ABNORMALITY OF SECRETION OF GASTRIN	ENDOCRINE	X	X	X	X
2518	OTHER SPECIFIED DISORDERS OF PANCREATIC INTERNAL S	ENDOCRINE	X	X	X	X
2519	UNSPECIFIED DISORDER OF PANCREATIC INTERNAL SECRET	ENDOCRINE	X	X	X	X
25200	HYPERPARATHYROIDISM, UNSPECIFIED	ENDOCRINE	X	X	X	X
25201	PRIMARY HYPERPARATHYROIDISM	ENDOCRINE	X	X	X	X
25202	SECONDARY HYPERPARATHYROIDISM, NON-RENAL	ENDOCRINE	X	X	X	X
25208	OTHER HYPERPARATHYROIDISM	ENDOCRINE	X	X	X	X
2521	HYPOPARATHYROIDISM	ENDOCRINE	X	X	X	X
2528	OTHER SPECIFIED DISORDERS OF PARATHYROID GLAND	ENDOCRINE	X	X	X	X
2529	UNSPECIFIED DISORDER OF PARATHYROID GLAND	ENDOCRINE	X	X	X	X
2530	ACROMEGALY AND GIGANTISM	ENDOCRINE	X	X	X	X
2531	OTHER AND UNSPECIFIED ANTERIOR PITUITARY HYPERFUNC	ENDOCRINE	X	X	X	X
2532	PANHYPOPITUITARISM	ENDOCRINE	X	X	X	X
2533	PITUITARY DWARFISM	ENDOCRINE	X	X	X	X
2534	OTHER ANTERIOR PITUITARY DISORDERS	ENDOCRINE	X	X	X	X
2535	DIABETES INSIPIDUS	ENDOCRINE	X	X	X	X
2536	OTHER DISORDERS OF NEUROHYPOPHYSIS	ENDOCRINE	X	X	X	X
2537	IATROGENIC PITUITARY DISORDERS	ENDOCRINE	X	X	X	X
2538	OTHER DISORDERS OF THE PITUITARY AND OTHER SYNDROM	ENDOCRINE	X	X	X	X
2539	UNSPECIFIED DISORDER OF THE PITUITARY GLAND AND IT	ENDOCRINE	X	X	X	X
2540	PERSISTENT HYPERPLASIA OF THYMUS	ENDOCRINE	X	X	X	X
2541	ABSCESS OF THYMUS	ENDOCRINE	X	X	X	X
2548	OTHER SPECIFIED DISEASES OF THYMUS GLAND	ENDOCRINE	X	X	X	X
2549	UNSPECIFIED DISEASE OF THYMUS GLAND	ENDOCRINE	X	X	X	X
2550	CUSHING'S SYNDROME	ENDOCRINE	X	X	X	X
25510	HYPERALDOSTERONISM, UNSPECIFIED	ENDOCRINE	X	X	X	X
25511	GLUCOCORTICOID-REMEDIABLE ALDOSTERONISM	ENDOCRINE	X	X	X	X
25512	CONN'S SYNDROME	ENDOCRINE	X	X	X	X
25513	BARTTER'S SYNDROME	ENDOCRINE	X	X	X	X
25514	OTHER SECONDARY ALDOSTERONISM	ENDOCRINE	X	X	X	X
2552	ADRENOGENITAL DISORDERS	ENDOCRINE	X	X	X	X
2553	OTHER CORTICOADRENAL OVERACTIVITY	ENDOCRINE	X	X	X	X
25541	GLUCOCORTICOID DEFICIENCY	ENDOCRINE	X	X	X	X
25542	MINERALCORTICOID DEFICIENCY	ENDOCRINE	X	X	X	X
2555	OTHER ADRENAL HYPOFUNCTION	ENDOCRINE	X	X	X	X
2556	MEDULLOADRENAL HYPERFUNCTION	ENDOCRINE	X	X	X	X
2558	OTHER SPECIFIED DISORDERS OF ADRENAL GLANDS	ENDOCRINE	X	X	X	X
2559	UNSPECIFIED DISORDER OF ADRENAL GLANDS	ENDOCRINE	X	X	X	X
2560	HYPERESTROGENISM	ENDOCRINE	X	X	X	X
2561	OTHER OVARIAN HYPERFUNCTION	ENDOCRINE	X	X	X	X
2562	POSTABLATIVE OVARIAN FAILURE	ENDOCRINE	X	X	X	X
25631	PREMATURE MENOPAUSE	ENDOCRINE	X	X	X	X
25639	OTHER OVARIAN FAILURE	ENDOCRINE	X	X	X	X
2564	POLYCYSTIC OVARIES	ENDOCRINE	X	X	X	X
2568	OTHER OVARIAN DYSFUNCTION	ENDOCRINE	X	X	X	X
2569	UNSPECIFIED OVARIAN DYSFUNCTION	ENDOCRINE	X	X	X	X
2570	TESTICULAR HYPERFUNCTION	ENDOCRINE	X	X	X	X
2571	POSTABLATIVE TESTICULAR HYPOFUNCTION	ENDOCRINE	X	X	X	X
2572	OTHER TESTICULAR HYPOFUNCTION	ENDOCRINE	X	X	X	X
2578	OTHER TESTICULAR DYSFUNCTION	ENDOCRINE	X	X	X	X
2579	UNSPECIFIED TESTICULAR DYSFUNCTION	ENDOCRINE	X	X	X	X
25801	MULTIPLE ENDOCRINE NEOPLASIA [MEN] TYPE I	ENDOCRINE	X	X	X	X
25802	MULTIPLE ENDOCRINE NEOPLASIA [MEN] TYPE IIA	ENDOCRINE	X	X	X	X
25803	MULTIPLE ENDOCRINE NEOPLASIA [MEN] TYPE IIB	ENDOCRINE	X	X	X	X
2581	OTHER COMBINATIONS OF ENDOCRINE DYSFUNCTION	ENDOCRINE	X	X	X	X
2588	OTHER SPECIFIED POLYGLANDULAR DYSFUNCTION	ENDOCRINE	X	X	X	X
2589	POLYGLANDULAR DYSFUNCTION, UNSPECIFIED	ENDOCRINE	X	X	X	X
2590	DELAY IN SEXUAL DEVELOPMENT AND PUBERTY, NOT ELSEW	ENDOCRINE	X	X	X	X
2591	PRECOCIOUS SEXUAL DEVELOPMENT AND PUBERTY, NOT ELS	ENDOCRINE	X	X	X	X
2592	CARCINOID SYNDROME	ENDOCRINE	X	X	X	X
2593	ECTOPIC HORMONE SECRETION, NOT ELSEWHERE CLASSIFIE	ENDOCRINE	X	X	X	X
2594	DWARFISM, NOT ELSEWHERE CLASSIFIED	ENDOCRINE	X	X	X	X
25950	ANDROGEN INSENSITIVITY, UNSPECIFIED	ENDOCRINE	X	X	X	X
25951	ANDROGEN INSENSITIVITY SYNDROME	ENDOCRINE	X	X	X	X
25952	PARTIAL ANDROGEN INSENSITIVITY	ENDOCRINE	X	X	X	X
2598	OTHER SPECIFIED ENDOCRINE DISORDERS	ENDOCRINE	X	X	X	X
2599	UNSPECIFIED ENDOCRINE DISORDER	ENDOCRINE	X	X	X	X
260	KWASHIORKOR	ENDOCRINE	X	X	X	X
261	NUTRITIONAL MARASMUS	ENDOCRINE	X	X	X	X
262	OTHER SEVERE PROTEIN-CALORIE MALNUTRITION	ENDOCRINE	X	X	X	X
2630	MALNUTRITION OF MODERATE DEGREE	ENDOCRINE	X	X	X	X
2631	MALNUTRITION OF MILD DEGREE	ENDOCRINE	X	X	X	X
2632	ARRESTED DEVELOPMENT FOLLOWING PROTEIN-CALORIE MAL	ENDOCRINE	X	X	X	X
2638	OTHER PROTEIN-CALORIE MALNUTRITION	ENDOCRINE	X	X	X	X
2639	UNSPECIFIED PROTEIN-CALORIE MALNUTRITION	ENDOCRINE	X	X	X	X
2640	VITAMIN A DEFICIENCY WITH CONJUNCTIVAL XEROSIS	ENDOCRINE	X	X	X	X
2641	VITAMIN A DEFICIENCY WITH CONJUNCTIVAL XEROSIS AND	ENDOCRINE	X	X	X	X
2642	VITAMIN A DEFICIENCY WITH CORNEAL XEROSIS	ENDOCRINE	X	X	X	X
2643	VITAMIN A DEFICIENCY WITH CORNEAL ULCERATION AND X	ENDOCRINE	X	X	X	X
2644	VITAMIN A DEFICIENCY WITH KERATOMALACIA	ENDOCRINE	X	X	X	X
2645	VITAMIN A DEFICIENCY WITH NIGHT BLINDNESS	ENDOCRINE	X	X	X	X
2646	VITAMIN A DEFICIENCY WITH XEROPHTHALMIC SCARS OF C	ENDOCRINE	X	X	X	X
2647	OTHER OCULAR MANIFESTATIONS OF VITAMIN A DEFICIENC	ENDOCRINE	X	X	X	X
2648	OTHER MANIFESTATIONS OF VITAMIN A DEFICIENCY	ENDOCRINE	X	X	X	X
2649	UNSPECIFIED VITAMIN A DEFICIENCY	ENDOCRINE	X	X	X	X
2650	BERIBERI	ENDOCRINE	X	X	X	X
2651	OTHER AND UNSPECIFIED MANIFESTATIONS OF THIAMINE D	ENDOCRINE	X	X	X	X
2652	PELLAGRA	ENDOCRINE	X	X	X	X
2660	ARIBOFLAVINOSIS	ENDOCRINE	X	X	X	X
2661	VITAMIN B6 DEFICIENCY	ENDOCRINE	X	X	X	X
2662	OTHER B-COMPLEX DEFICIENCIES	ENDOCRINE	X	X	X	X
2669	UNSPECIFIED VITAMIN B DEFICIENCY	ENDOCRINE	X	X	X	X
267	ASCORBIC ACID DEFICIENCY	ENDOCRINE	X	X	X	X
2680	RICKETS, ACTIVE	ENDOCRINE	X	X	X	X
2681	RICKETS, LATE EFFECT	ENDOCRINE	X	X	X	X
2682	OSTEOMALACIA, UNSPECIFIED	ENDOCRINE	X	X	X	X
2689	UNSPECIFIED VITAMIN D DEFICIENCY	ENDOCRINE	X	X	X	X
2690	DEFICIENCY OF VITAMIN K	ENDOCRINE	X	X	X	X
2691	DEFICIENCY OF OTHER VITAMINS	ENDOCRINE	X	X	X	X
2692	UNSPECIFIED VITAMIN DEFICIENCY	ENDOCRINE	X	X	X	X
2693	MINERAL DEFICIENCY, NOT ELSEWHERE CLASSIFIED	ENDOCRINE	X	X	X	X
2698	OTHER NUTRITIONAL DEFICIENCY	ENDOCRINE	X	X	X	X
2699	UNSPECIFIED NUTRITIONAL DEFICIENCY	ENDOCRINE	X	X	X	X
2700	DISTURBANCES OF AMINO-ACID TRANSPORT	ENDOCRINE	X	X	X	X
2701	PHENYLKETONURIA [PKU]	ENDOCRINE	X	X	X	X
2702	OTHER DISTURBANCES OF AROMATIC AMINO-ACID METABOLI	ENDOCRINE	X	X	X	X
2703	DISTURBANCES OF BRANCHED-CHAIN AMINO-ACID METABOLI	ENDOCRINE	X	X	X	X
2704	DISTURBANCES OF SULPHUR-BEARING AMINO-ACID METABOL	ENDOCRINE	X	X	X	X
2705	DISTURBANCES OF HISTIDINE METABOLISM	ENDOCRINE	X	X	X	X
2706	DISORDERS OF UREA CYCLE METABOLISM	ENDOCRINE	X	X	X	X
2707	OTHER DISTURBANCES OF STRAIGHT-CHAIN AMINO-ACID ME	ENDOCRINE	X	X	X	X
2708	OTHER SPECIFIED DISORDERS OF AMINO-ACID METABOLISM	ENDOCRINE	X	X	X	X
2709	UNSPECIFIED DISORDER OF AMINO-ACID METABOLISM	ENDOCRINE	X	X	X	X
2710	GLYCOGENOSIS	ENDOCRINE	X	X	X	X
2711	GALACTOSEMIA	ENDOCRINE	X	X	X	X
2712	HEREDITARY FRUCTOSE INTOLERANCE	ENDOCRINE	X	X	X	X
2713	INTESTINAL DISACCHARIDASE DEFICIENCIES AND DISACCH	ENDOCRINE	X	X	X	X
2714	RENAL GLYCOSURIA	ENDOCRINE	X	X	X	X
2718	OTHER SPECIFIED DISORDERS OF CARBOHYDRATE TRANSPOR	ENDOCRINE	X	X	X	X
2719	UNSPECIFIED DISORDER OF CARBOHYDRATE TRANSPORT AND	ENDOCRINE	X	X	X	X
2720	PURE HYPERCHOLESTEROLEMIA	ENDOCRINE	X	X	X	X
2721	PURE HYPERGLYCERIDEMIA	ENDOCRINE	X	X	X	X
2722	MIXED HYPERLIPIDEMIA	ENDOCRINE	X	X	X	X
2723	HYPERCHYLOMICRONEMIA	ENDOCRINE	X	X	X	X
2724	OTHER AND UNSPECIFIED HYPERLIPIDEMIA	ENDOCRINE	X	X	X	X
2725	LIPOPROTEIN DEFICIENCIES	ENDOCRINE	X	X	X	X
2726	LIPODYSTROPHY	ENDOCRINE	X	X	X	X
2727	LIPIDOSES	ENDOCRINE	X	X	X	X
2728	OTHER DISORDERS OF LIPOID METABOLISM	ENDOCRINE	X	X	X	X
2729	UNSPECIFIED DISORDER OF LIPOID METABOLISM	ENDOCRINE	X	X	X	X
2730	POLYCLONAL HYPERGAMMAGLOBULINEMIA	ENDOCRINE	X	X	X	X
2731	MONOCLONAL PARAPROTEINEMIA	ENDOCRINE	X	X	X	X
2732	OTHER PARAPROTEINEMIAS	ENDOCRINE	X	X	X	X
2733	MACROGLOBULINEMIA	ENDOCRINE	X	X	X	X
2734	ALPHA-1-ANTITRYPSIN DEFICIENCY	ENDOCRINE	X	X	X	X
2738	OTHER DISORDERS OF PLASMA PROTEIN METABOLISM	ENDOCRINE	X	X	X	X
2739	UNSPECIFIED DISORDER OF PLASMA PROTEIN METABOLISM	ENDOCRINE	X	X	X	X
2740	GOUTY ARTHROPATHY	ENDOCRINE	X
27400	GOUTY ARTHROPATHY, UNSPECIFIED	ENDOCRINE		X	X	X
27401	ACUTE GOUTY ARTHROPATHY	ENDOCRINE		X	X	X
27402	CHRONIC GOUTY ARTHROPATHY WITHOUT MENTION OF TOPHU	ENDOCRINE		X	X	X
27403	CHRONIC GOUTY ARTHROPATHY WITH TOPHUS (TOPHI)	ENDOCRINE		X	X	X
27410	GOUTY NEPHROPATHY, UNSPECIFIED	ENDOCRINE	X	X	X	X
27411	URIC ACID NEPHROLITHIASIS	ENDOCRINE	X	X	X	X
27419	OTHER GOUTY NEPHROPATHY	ENDOCRINE	X	X	X	X
27481	GOUTY TOPHI OF EAR	ENDOCRINE	X	X	X	X
27482	GOUTY TOPHI OF OTHER SITES	ENDOCRINE	X	X	X	X
27489	GOUT WITH OTHER SPECIFIED MANIFESTATIONS	ENDOCRINE	X	X	X	X
2749	GOUT, UNSPECIFIED	ENDOCRINE	X	X	X	X
2750	DISORDERS OF IRON METABOLISM	ENDOCRINE	X	X
27501	HEREDITARY HEMOCHROMATOSIS	ENDOCRINE			X	X
27502	HEMOCHROMATOSIS DUE TO REPEATED RED BLOOD CELL TRA	ENDOCRINE			X	X
27503	OTHER HEMOCHROMATOSIS	ENDOCRINE			X	X
27509	OTHER DISORDERS OF IRON METABOLISM	ENDOCRINE			X	X
2751	DISORDERS OF COPPER METABOLISM	ENDOCRINE	X	X	X	X
2752	DISORDERS OF MAGNESIUM METABOLISM	ENDOCRINE	X	X	X	X
2753	DISORDERS OF PHOSPHORUS METABOLISM	ENDOCRINE	X	X	X	X
27540	UNSPECIFIED DISORDER OF CALCIUM METABOLISM	ENDOCRINE	X	X	X	X
27541	HYPOCALCEMIA	ENDOCRINE	X	X	X	X
27542	HYPERCALCEMIA	ENDOCRINE	X	X	X	X
27549	OTHER DISORDER OF CALCIUM METABOLISM	ENDOCRINE	X	X	X	X
2755	HUNGRY BONE SYNDROME	ENDOCRINE	X	X	X	X
2758	OTHER SPECIFIED DISORDERS OF MINERAL METABOLISM	ENDOCRINE	X	X	X	X
2759	UNSPECIFIED DISORDER OF MINERAL METABOLISM	ENDOCRINE	X	X	X	X
2760	HYPEROSMOLALITY AND/OR HYPERNATREMIA	ENDOCRINE	X	X	X	X
2761	HYPOSMOLALITY AND/OR HYPONATREMIA	ENDOCRINE	X	X	X	X
2762	ACIDOSIS	ENDOCRINE	X	X	X	X
2763	ALKALOSIS	ENDOCRINE	X	X	X	X
2764	MIXED ACID-BASE BALANCE DISORDER	ENDOCRINE	X	X	X	X
27650	VOLUME DEPLETION, UNSPECIFIED	ENDOCRINE	X	X	X	X
27651	DEHYDRATION	ENDOCRINE	X	X	X	X
27652	HYPOVOLEMIA	ENDOCRINE	X	X	X	X
2766	FLUID OVERLOAD	ENDOCRINE	X	X
27661	TRANSFUSION ASSOCIATED CIRCULATORY OVERLOAD	ENDOCRINE			X	X
27669	OTHER FLUID OVERLOAD	ENDOCRINE			X	X
2767	HYPERPOTASSEMIA	ENDOCRINE	X	X	X	X
2768	HYPOPOTASSEMIA	ENDOCRINE	X	X	X	X
2769	ELECTROLYTE AND FLUID DISORDERS NOT ELSEWHERE CLAS	ENDOCRINE	X	X	X	X
27700	CYSTIC FIBROSIS WITHOUT MENTION OF MECONIUM ILEUS	ENDOCRINE	X	X	X	X
27701	CYSTIC FIBROSIS WITH MECONIUM ILEUS	ENDOCRINE	X	X	X	X
27702	CYSTIC FIBROSIS WITH PULMONARY MANIFESTATIONS	ENDOCRINE	X	X	X	X
27703	CYSTIC FIBROSIS WITH GASTROINTESTINAL MANIFESTATIO	ENDOCRINE	X	X	X	X
27709	CYSTIC FIBROSIS WITH OTHER MANIFESTATIONS	ENDOCRINE	X	X	X	X
2771	DISORDERS OF PORPHYRIN METABOLISM	ENDOCRINE	X	X	X	X
2772	OTHER DISORDERS OF PURINE AND PYRIMIDINE METABOLIS	ENDOCRINE	X	X	X	X
27730	AMYLOIDOSIS, UNSPECIFIED	ENDOCRINE	X	X	X	X
27731	FAMILIAL MEDITERRANEAN FEVER	ENDOCRINE	X	X	X	X
27739	OTHER AMYLOIDOSIS	ENDOCRINE	X	X	X	X
2774	DISORDERS OF BILIRUBIN EXCRETION	ENDOCRINE	X	X	X	X
2775	MUCOPOLYSACCHARIDOSIS	ENDOCRINE	X	X	X	X
2776	OTHER DEFICIENCIES OF CIRCULATING ENZYMES	ENDOCRINE	X	X	X	X
2777	DYSMETABOLIC SYNDROME X	ENDOCRINE	X	X	X	X
27781	PRIMARY CARNITINE DEFICIENCY	ENDOCRINE	X	X	X	X
27782	CARNITINE DEFICIENCY DUE TO INBORN ERRORS OF METAB	ENDOCRINE	X	X	X	X
27783	IATROGENIC CARNITINE DEFICIENCY	ENDOCRINE	X	X	X	X
27784	OTHER SECONDARY CARNITINE DEFICIENCY	ENDOCRINE	X	X	X	X
27785	DISORDERS OF FATTY ACID OXIDATION	ENDOCRINE	X	X	X	X
27786	PEROXISOMAL DISORDERS	ENDOCRINE	X	X	X	X
27787	DISORDERS OF MITOCHONDRIAL METABOLISM	ENDOCRINE	X	X	X	X
27788	TUMOR LYSIS SYNDROME	ENDOCRINE		X	X	X
27789	OTHER SPECIFIED DISORDERS OF METABOLISM	ENDOCRINE	X	X	X	X
2779	UNSPECIFIED DISORDER OF METABOLISM	ENDOCRINE	X	X	X	X
27800	OBESITY, UNSPECIFIED	ENDOCRINE	X	X	X	X
27801	MORBID OBESITY	ENDOCRINE	X	X	X	X
27802	OVERWEIGHT	ENDOCRINE	X	X	X	X
27803	OBESITY HYPOVENTILATION SYNDROME	ENDOCRINE			X	X
2781	LOCALIZED ADIPOSITY	ENDOCRINE	X	X	X	X
2782	HYPERVITAMINOSIS A	ENDOCRINE	X	X	X	X
2783	HYPERCAROTINEMIA	ENDOCRINE	X	X	X	X
2784	HYPERVITAMINOSIS D	ENDOCRINE	X	X	X	X
2788	OTHER HYPERALIMENTATION	ENDOCRINE	X	X	X	X
27900	HYPOGAMMAGLOBULINEMIA, UNSPECIFIED	ENDOCRINE	X	X	X	X
27901	SELECTIVE IGA IMMUNODEFICIENCY	ENDOCRINE	X	X	X	X
27902	SELECTIVE IGM IMMUNODEFICIENCY	ENDOCRINE	X	X	X	X
27903	OTHER SELECTIVE IMMUNOGLOBULIN DEFICIENCIES	ENDOCRINE	X	X	X	X
27904	CONGENITAL HYPOGAMMAGLOBULINEMIA	ENDOCRINE	X	X	X	X
27905	IMMUNODEFICIENCY WITH INCREASED IGM	ENDOCRINE	X	X	X	X
27906	COMMON VARIABLE IMMUNODEFICIENCY	ENDOCRINE	X	X	X	X
27909	OTHER DEFICIENCY OF HUMORAL IMMUNITY	ENDOCRINE	X	X	X	X
27910	IMMUNODEFICIENCY WITH PREDOMINANT T-CELL DEFECT, U	ENDOCRINE	X	X	X	X
27911	DIGEORGE'S SYNDROME	ENDOCRINE	X	X	X	X
27912	WISKOTT-ALDRICH SYNDROME	ENDOCRINE	X	X	X	X
27913	NEZELOF'S SYNDROME	ENDOCRINE	X	X	X	X
27919	OTHER DEFICIENCY OF CELL-MEDIATED IMMUNITY	ENDOCRINE	X	X	X	X
2792	COMBINED IMMUNITY DEFICIENCY	ENDOCRINE	X	X	X	X
2793	UNSPECIFIED IMMUNITY DEFICIENCY	ENDOCRINE	X	X	X	X
2794	AUTOIMMUNE DISEASE, NOT ELSEWHERE CLASSIFIED	ENDOCRINE	X
27941	AUTOIMMUNE LYMPHOPROLIFERATIVE SYNDROME	ENDOCRINE		X	X	X
27949	AUTOIMMUNE DISEASE, NOT ELSEWHERE CLASSIFIED	ENDOCRINE		X	X	X
27950	GRAFT-VERSUS-HOST DISEASE, UNSPECIFIED	ENDOCRINE	X	X	X	X
27951	ACUTE GRAFT-VERSUS-HOST DISEASE	ENDOCRINE	X	X	X	X
27952	CHRONIC GRAFT-VERSUS-HOST DISEASE	ENDOCRINE	X	X	X	X
27953	ACUTE ON CHRONIC GRAFT-VERSUS-HOST DISEASE	ENDOCRINE	X	X	X	X
2798	OTHER SPECIFIED DISORDERS INVOLVING THE IMMUNE MEC	ENDOCRINE	X	X	X	X
2799	UNSPECIFIED DISORDER OF IMMUNE MECHANISM	ENDOCRINE	X	X	X	X
2800	IRON DEFICIENCY ANEMIA SECONDARY TO BLOOD LOSS (CH	HEMATOLOGY	X	X	X	X
2801	IRON DEFICIENCY ANEMIA SECONDARY TO INADEQUATE DIE	HEMATOLOGY	X	X	X	X
2808	OTHER SPECIFIED IRON DEFICIENCY ANEMIAS	HEMATOLOGY	X	X	X	X
2809	IRON DEFICIENCY ANEMIA, UNSPECIFIED	HEMATOLOGY	X	X	X	X
2810	PERNICIOUS ANEMIA	HEMATOLOGY	X	X	X	X
2811	OTHER VITAMIN B12 DEFICIENCY ANEMIA	HEMATOLOGY	X	X	X	X
2812	FOLATE-DEFICIENCY ANEMIA	HEMATOLOGY	X	X	X	X
2813	OTHER SPECIFIED MEGALOBLASTIC ANEMIAS NOT ELSEWHER	HEMATOLOGY	X	X	X	X
2814	PROTEIN-DEFICIENCY ANEMIA	HEMATOLOGY	X	X	X	X
2818	ANEMIA ASSOCIATED WITH OTHER SPECIFIED NUTRITIONAL	HEMATOLOGY	X	X	X	X
2819	UNSPECIFIED DEFICIENCY ANEMIA	HEMATOLOGY	X	X	X	X
2820	HEREDITARY SPHEROCYTOSIS	HEMATOLOGY	X	X	X	X
2821	HEREDITARY ELLIPTOCYTOSIS	HEMATOLOGY	X	X	X	X
2822	ANEMIAS DUE TO DISORDERS OF GLUTATHIONE METABOLISM	HEMATOLOGY	X	X	X	X
2823	OTHER HEMOLYTIC ANEMIAS DUE TO ENZYME DEFICIENCY	HEMATOLOGY	X	X	X	X
28240	THALASSEMIA, UNSPECIFIED	HEMATOLOGY				X
28241	SICKLE-CELL THALASSEMIA WITHOUT CRISIS	HEMATOLOGY	X	X	X	X
28242	SICKLE-CELL THALASSEMIA WITH CRISIS	HEMATOLOGY	X	X	X	X
28243	ALPHA THALASSEMIA	HEMATOLOGY				X
28244	BETA THALASSEMIA	HEMATOLOGY				X
28245	DELTA-BETA THALASSEMIA	HEMATOLOGY				X
28246	THALASSEMIA MINOR	HEMATOLOGY				X
28247	HEMOGLOBIN E-BETA THALASSEMIA	HEMATOLOGY				X
28249	OTHER THALASSEMIA	HEMATOLOGY	X	X	X	X
2825	SICKLE-CELL TRAIT	HEMATOLOGY	X	X	X	X
28260	SICKLE-CELL DISEASE, UNSPECIFIED	HEMATOLOGY	X	X	X	X
28261	HB-SS DISEASE WITHOUT CRISIS	HEMATOLOGY	X	X	X	X
28262	HB-SS DISEASE WITH CRISIS	HEMATOLOGY	X	X	X	X
28263	SICKLE-CELL/HB-C DISEASE WITHOUT CRISIS	HEMATOLOGY	X	X	X	X
28264	SICKLE-CELL/HB-C DISEASE WITH CRISIS	HEMATOLOGY	X	X	X	X
28268	OTHER SICKLE-CELL DISEASE WITHOUT CRISIS	HEMATOLOGY	X	X	X	X
28269	OTHER SICKLE-CELL DISEASE WITH CRISIS	HEMATOLOGY	X	X	X	X
2827	OTHER HEMOGLOBINOPATHIES	HEMATOLOGY	X	X	X	X
2828	OTHER SPECIFIED HEREDITARY HEMOLYTIC ANEMIAS	HEMATOLOGY	X	X	X	X
2829	HEREDITARY HEMOLYTIC ANEMIA, UNSPECIFIED	HEMATOLOGY	X	X	X	X
2830	AUTOIMMUNE HEMOLYTIC ANEMIAS	HEMATOLOGY	X	X	X	X
28310	NON-AUTOIMMUNE HEMOLYTIC ANEMIA, UNSPECIFIED	HEMATOLOGY	X	X	X	X
28311	HEMOLYTIC-UREMIC SYNDROME	HEMATOLOGY	X	X	X	X
28319	OTHER NON-AUTOIMMUNE HEMOLYTIC ANEMIAS	HEMATOLOGY	X	X	X	X
2832	HEMOGLOBINURIA DUE TO HEMOLYSIS FROM EXTERNAL CAUS	HEMATOLOGY	X	X	X	X
2839	ACQUIRED HEMOLYTIC ANEMIA, UNSPECIFIED	HEMATOLOGY	X	X	X	X
28401	CONSTITUTIONAL RED BLOOD CELL APLASIA	HEMATOLOGY	X	X	X	X
28409	OTHER CONSTITUTIONAL APLASTIC ANEMIA	HEMATOLOGY	X	X	X	X
2841	PANCYTOPENIA	HEMATOLOGY	X	X	X
28411	ANTINEOPLASTIC CHEMOTHERAPY INDUCED PANCYTOPENIA	HEMATOLOGY				X
28412	OTHER DRUG-INDUCED PANCYTOPENIA	HEMATOLOGY				X
28419	OTHER PANCYTOPENIA	HEMATOLOGY				X
2842	MYELOPHTHISIS	HEMATOLOGY	X	X	X	X
28481	RED CELL APLASIA (ACQUIRED)(ADULT)(WITH THYMOMA)	HEMATOLOGY	X	X	X	X
28489	OTHER SPECIFIED APLASTIC ANEMIAS	HEMATOLOGY	X	X	X	X
2849	APLASTIC ANEMIA, UNSPECIFIED	HEMATOLOGY	X	X	X	X
2850	SIDEROBLASTIC ANEMIA	HEMATOLOGY	X	X	X	X
2851	ACUTE POSTHEMORRHAGIC ANEMIA	HEMATOLOGY	X	X	X	X
28521	ANEMIA IN CHRONIC KIDNEY DISEASE	HEMATOLOGY	X	X	X	X
28522	ANEMIA IN NEOPLASTIC DISEASE	HEMATOLOGY	X	X	X	X
28529	ANEMIA OF OTHER CHRONIC DISEASE	HEMATOLOGY	X	X	X	X
2853	ANTINEOPLASTIC CHEMOTHERAPY INDUCED ANEMIA	HEMATOLOGY		X	X	X
2858	OTHER SPECIFIED ANEMIAS	HEMATOLOGY	X	X	X	X
2859	ANEMIA, UNSPECIFIED	HEMATOLOGY	X	X	X	X
2860	CONGENITAL FACTOR VIII DISORDER	HEMATOLOGY	X	X	X	X
2861	CONGENITAL FACTOR IX DISORDER	HEMATOLOGY	X	X	X	X
2862	CONGENITAL FACTOR XI DEFICIENCY	HEMATOLOGY	X	X	X	X
2863	CONGENITAL DEFICIENCY OF OTHER CLOTTING FACTORS	HEMATOLOGY	X	X	X	X
2864	VON WILLEBRAND'S DISEASE	HEMATOLOGY	X	X	X	X
2865	HEMORRHAGIC DISORDER DUE TO INTRINSIC CIRCULATING ANTICOAGULANTS	HEMATOLOGY	X	X	X
28652	ACQUIRED HEMOPHILIA	HEMATOLOGY				X
28653	ANTIPHOSPHOLIPID ANTIBODY WITH HEMORRHAGIC DISORDE	HEMATOLOGY				X
28659	OTHER HEMORRHAGIC DISORDER DUE TO INTRINSIC CIRCUL	HEMATOLOGY				X
2866	DEFIBRINATION SYNDROME	HEMATOLOGY	X	X	X	X
2867	ACQUIRED COAGULATION FACTOR DEFICIENCY	HEMATOLOGY	X	X	X	X
2869	OTHER AND UNSPECIFIED COAGULATION DEFECTS	HEMATOLOGY	X	X	X	X
2870	ALLERGIC PURPURA	HEMATOLOGY	X	X	X	X
2871	QUALITATIVE PLATELET DEFECTS	HEMATOLOGY	X	X	X	X
2872	OTHER NONTHROMBOCYTOPENIC PURPURAS	HEMATOLOGY	X	X	X	X
28730	PRIMARY THROMBOCYTOPENIA, UNSPECIFIED	HEMATOLOGY	X	X	X	X
28731	IMMUNE THROMBOCYTOPENIC PURPURA	HEMATOLOGY	X	X	X	X
28732	EVANS' SYNDROME	HEMATOLOGY	X	X	X	X
28733	CONGENITAL AND HEREDITARY THROMBOCYTOPENIC PURPURA	HEMATOLOGY	X	X	X	X
28739	OTHER PRIMARY THROMBOCYTOPENIA	HEMATOLOGY	X	X	X	X
2874	SECONDARY THROMBOCYTOPENIA	HEMATOLOGY	X	X
28741	POSTTRANSFUSION PURPURA	HEMATOLOGY			X	X
28749	OTHER SECONDARY THROMBOCYTOPENIA	HEMATOLOGY			X	X
2875	THROMBOCYTOPENIA, UNSPECIFIED	HEMATOLOGY	X	X	X	X
2878	OTHER SPECIFIED HEMORRHAGIC CONDITIONS	HEMATOLOGY	X	X	X	X
2879	UNSPECIFIED HEMORRHAGIC CONDITIONS	HEMATOLOGY	X	X	X	X
28800	NEUTROPENIA, UNSPECIFIED	HEMATOLOGY	X	X	X	X
28801	CONGENITAL NEUTROPENIA	HEMATOLOGY	X	X	X	X
28802	CYCLIC NEUTROPENIA	HEMATOLOGY	X	X	X	X
28803	DRUG INDUCED NEUTROPENIA	HEMATOLOGY	X	X	X	X
28804	NEUTROPENIA DUE TO INFECTION	HEMATOLOGY	X	X	X	X
28809	OTHER NEUTROPENIA	HEMATOLOGY	X	X	X	X
2881	FUNCTIONAL DISORDERS OF POLYMORPHONUCLEAR NEUTROPH	HEMATOLOGY	X	X	X	X
2882	GENETIC ANOMALIES OF LEUKOCYTES	HEMATOLOGY	X	X	X	X
2883	EOSINOPHILIA	HEMATOLOGY	X	X	X	X
2884	HEMOPHAGOCYTIC SYNDROMES	HEMATOLOGY	X	X	X	X
28850	LEUKOCYTOPENIA, UNSPECIFIED	HEMATOLOGY	X	X	X	X
28851	LYMPHOCYTOPENIA	HEMATOLOGY	X	X	X	X
28859	OTHER DECREASED WHITE BLOOD CELL COUNT	HEMATOLOGY	X	X	X	X
28860	LEUKOCYTOSIS, UNSPECIFIED	HEMATOLOGY	X	X	X	X
28861	LYMPHOCYTOSIS (SYMPTOMATIC)	HEMATOLOGY	X	X	X	X
28862	LEUKEMOID REACTION	HEMATOLOGY	X	X	X	X
28863	MONOCYTOSIS (SYMPTOMATIC)	HEMATOLOGY	X	X	X	X
28864	PLASMACYTOSIS	HEMATOLOGY	X	X	X	X
28865	BASOPHILIA	HEMATOLOGY	X	X	X	X
28866	BANDEMIA	HEMATOLOGY	X	X	X	X
28869	OTHER ELEVATED WHITE BLOOD CELL COUNT	HEMATOLOGY	X	X	X	X
2888	OTHER SPECIFIED DISEASE OF WHITE BLOOD CELLS	HEMATOLOGY	X	X	X	X
2889	UNSPECIFIED DISEASE OF WHITE BLOOD CELLS	HEMATOLOGY	X	X	X	X
2890	POLYCYTHEMIA, SECONDARY	HEMATOLOGY	X	X	X	X
2891	CHRONIC LYMPHADENITIS	HEMATOLOGY	X	X	X	X
2892	NONSPECIFIC MESENTERIC LYMPHADENITIS	HEMATOLOGY	X	X	X	X
2893	LYMPHADENITIS, UNSPECIFIED, EXCEPT MESENTERIC	HEMATOLOGY	X	X	X	X
2894	HYPERSPLENISM	HEMATOLOGY	X	X	X	X
28950	DISEASE OF SPLEEN, UNSPECIFIED	HEMATOLOGY	X	X	X	X
28951	CHRONIC CONGESTIVE SPLENOMEGALY	HEMATOLOGY	X	X	X	X
28952	SPLENIC SEQUESTRATION	HEMATOLOGY	X	X	X	X
28953	NEUTROPENIC SPLENOMEGALY	HEMATOLOGY	X	X	X	X
28959	OTHER DISEASES OF SPLEEN	HEMATOLOGY	X	X	X	X
2896	FAMILIAL POLYCYTHEMIA	HEMATOLOGY	X	X	X	X
2897	METHEMOGLOBINEMIA	HEMATOLOGY	X	X	X	X
28981	PRIMARY HYPERCOAGULABLE STATE	HEMATOLOGY	X	X	X	X
28982	SECONDARY HYPERCOAGULABLE STATE	HEMATOLOGY	X	X	X	X
28983	MYELOFIBROSIS	HEMATOLOGY	X	X	X	X
28984	HEPARIN-INDUCED THROMBOCYTOPENIA (HIT)	HEMATOLOGY	X	X	X	X
28989	OTHER SPECIFIED DISEASES OF BLOOD AND BLOOD-FORMIN	HEMATOLOGY	X	X	X	X
2899	UNSPECIFIED DISEASES OF BLOOD AND BLOOD-FORMING OR	HEMATOLOGY	X	X	X	X
2900	SENILE DEMENTIA, UNCOMPLICATED	PSYCHIATRY	X	X	X	X
29010	PRESENILE DEMENTIA, UNCOMPLICATED	PSYCHIATRY	X	X	X	X
29011	PRESENILE DEMENTIA WITH DELIRIUM	PSYCHIATRY	X	X	X	X
29012	PRESENILE DEMENTIA WITH DELUSIONAL FEATURES	PSYCHIATRY	X	X	X	X
29013	PRESENILE DEMENTIA WITH DEPRESSIVE FEATURES	PSYCHIATRY	X	X	X	X
29020	SENILE DEMENTIA WITH DELUSIONAL FEATURES	PSYCHIATRY	X	X	X	X
29021	SENILE DEMENTIA WITH DEPRESSIVE FEATURES	PSYCHIATRY	X	X	X	X
2903	SENILE DEMENTIA WITH DELIRIUM	PSYCHIATRY	X	X	X	X
29040	VASCULAR DEMENTIA, UNCOMPLICATED	PSYCHIATRY	X	X	X	X
29041	VASCULAR DEMENTIA WITH DELIRIUM	PSYCHIATRY	X	X	X	X
29042	VASCULAR DEMENTIA WITH DELUSIONS	PSYCHIATRY	X	X	X	X
29043	VASCULAR DEMENTIA WITH DEPRESSED MOOD	PSYCHIATRY	X	X	X	X
2908	OTHER SPECIFIED SENILE PSYCHOTIC CONDITIONS	PSYCHIATRY	X	X	X	X
2909	UNSPECIFIED SENILE PSYCHOTIC CONDITION	PSYCHIATRY	X	X	X	X
2910	ALCOHOL WITHDRAWAL DELIRIUM	PSYCHIATRY	X	X	X	X
2911	ALCOHOL INDUCED PERSISTING AMNESTIC DISORDER	PSYCHIATRY	X	X	X	X
2912	ALCOHOL INDUCED PERSISTING DEMENTIA	PSYCHIATRY	X	X	X	X
2913	ALCOHOL INDUCED PSYCHOTIC DISORDER WITH HALLUCINAT	PSYCHIATRY	X	X	X	X
2914	IDIOSYNCRATIC ALCOHOL INTOXICATION	PSYCHIATRY	X	X	X	X
2915	ALCOHOL INDUCED PSYCHOTIC DISORDER WITH DELUSIONS	PSYCHIATRY	X	X	X	X
29181	ALCOHOL WITHDRAWAL	PSYCHIATRY	X	X	X	X
29182	ALCOHOL INDUCED SLEEP DISORDERS	PSYCHIATRY	X	X	X	X
29189	OTHER SPECIFIED ALCOHOL INDUCED MENTAL DISORDERS	PSYCHIATRY	X	X	X	X
2919	UNSPECIFIED ALCOHOL INDUCED MENTAL DISORDERS	PSYCHIATRY	X	X	X	X
2920	DRUG WITHDRAWAL	PSYCHIATRY	X	X	X	X
29211	DRUG INDUCED PSYCHOTIC DISORDER WITH DELUSIONS	PSYCHIATRY	X	X	X	X
29212	DRUG INDUCED PSYCHOTIC DISORDER WITH HALLUCINATION	PSYCHIATRY	X	X	X	X
2922	PATHOLOGICAL DRUG INTOXICATION	PSYCHIATRY	X	X	X	X
29281	DRUG INDUCED DELIRIUM	PSYCHIATRY	X	X	X	X
29282	DRUG INDUCED PERSISTING DEMENTIA	PSYCHIATRY	X	X	X	X
29283	DRUG INDUCED PERSISTING AMNESTIC DISORDER	PSYCHIATRY	X	X	X	X
29284	DRUG INDUCED MOOD DISORDER	PSYCHIATRY	X	X	X	X
29285	DRUG INDUCED SLEEP DISORDERS	PSYCHIATRY	X	X	X	X
29289	OTHER SPECIFIED DRUG-INDUCED MENTAL DISORDERS	PSYCHIATRY	X	X	X	X
2929	UNSPECIFIED DRUG-INDUCED MENTAL DISORDER	PSYCHIATRY	X	X	X	X
2930	DELIRIUM DUE TO CONDITIONS CLASSIFIED ELSEWHERE	PSYCHIATRY	X	X	X	X
2931	SUBACUTE DELIRIUM	PSYCHIATRY	X	X	X	X
29381	PSYCHOTIC DISORDER WITH DELUSIONS IN CONDITIONS CL	PSYCHIATRY	X	X	X	X
29382	PSYCHOTIC DISORDER WITH HALLUCINATIONS IN CONDITIO	PSYCHIATRY	X	X	X	X
29383	MOOD DISORDER IN CONDITIONS CLASSIFIED ELSEWHERE	PSYCHIATRY	X	X	X	X
29384	ANXIETY DISORDER IN CONDITIONS CLASSIFIED ELSEWHER	PSYCHIATRY	X	X	X	X
29389	OTHER SPECIFIED TRANSIENT MENTAL DISORDERS DUE TO	PSYCHIATRY	X	X	X	X
2939	UNSPECIFIED TRANSIENT MENTAL DISORDER IN CONDITION	PSYCHIATRY	X	X	X	X
2940	AMNESTIC DISORDER IN CONDITIONS CLASSIFIED ELSEWHE	PSYCHIATRY	X	X	X	X
29410	DEMENTIA IN CONDITIONS CLASSIFIED ELSEWHERE WITHOU	PSYCHIATRY	X	X	X	X
29411	DEMENTIA IN CONDITIONS CLASSIFIED ELSEWHERE WITH B	PSYCHIATRY	X	X	X	X
29420	DEMENTIA, UNSPECIFIED, WITHOUT BEHAVIORAL DISTURBA	PSYCHIATRY				X
29421	DEMENTIA, UNSPECIFIED, WITH BEHAVIORAL DISTURBANCE	PSYCHIATRY				X
2948	OTHER PERSISTENT MENTAL DISORDERS DUE TO CONDITION	PSYCHIATRY	X	X	X	X
2949	UNSPECIFIED PERSISTENT MENTAL DISORDERS DUE TO CON	PSYCHIATRY	X	X	X	X
29500	SIMPLE TYPE SCHIZOPHRENIA, UNSPECIFIED	PSYCHIATRY	X	X	X	X
29501	SIMPLE TYPE SCHIZOPHRENIA, SUBCHRONIC	PSYCHIATRY	X	X	X	X
29502	SIMPLE TYPE SCHIZOPHRENIA, CHRONIC	PSYCHIATRY	X	X	X	X
29503	SIMPLE TYPE SCHIZOPHRENIA, SUBCHRONIC WITH ACUTE E	PSYCHIATRY	X	X	X	X
29504	SIMPLE TYPE SCHIZOPHRENIA, CHRONIC WITH ACUTE EXAC	PSYCHIATRY	X	X	X	X
29505	SIMPLE TYPE SCHIZOPHRENIA, IN REMISSION	PSYCHIATRY	X	X	X	X
29510	DISORGANIZED TYPE SCHIZOPHRENIA, UNSPECIFIED	PSYCHIATRY	X	X	X	X
29511	DISORGANIZED TYPE SCHIZOPHRENIA, SUBCHRONIC	PSYCHIATRY	X	X	X	X
29512	DISORGANIZED TYPE SCHIZOPHRENIA, CHRONIC	PSYCHIATRY	X	X	X	X
29513	DISORGANIZED TYPE SCHIZOPHRENIA, SUBCHRONIC WITH A	PSYCHIATRY	X	X	X	X
29514	DISORGANIZED TYPE SCHIZOPHRENIA, CHRONIC WITH ACUT	PSYCHIATRY	X	X	X	X
29515	DISORGANIZED TYPE SCHIZOPHRENIA, IN REMISSION	PSYCHIATRY	X	X	X	X
29520	CATATONIC TYPE SCHIZOPHRENIA, UNSPECIFIED	PSYCHIATRY	X	X	X	X
29521	CATATONIC TYPE SCHIZOPHRENIA, SUBCHRONIC	PSYCHIATRY	X	X	X	X
29522	CATATONIC TYPE SCHIZOPHRENIA, CHRONIC	PSYCHIATRY	X	X	X	X
29523	CATATONIC TYPE SCHIZOPHRENIA, SUBCHRONIC WITH ACUT	PSYCHIATRY	X	X	X	X
29524	CATATONIC TYPE SCHIZOPHRENIA, CHRONIC WITH ACUTE E	PSYCHIATRY	X	X	X	X
29525	CATATONIC TYPE SCHIZOPHRENIA, IN REMISSION	PSYCHIATRY	X	X	X	X
29530	PARANOID TYPE SCHIZOPHRENIA, UNSPECIFIED	PSYCHIATRY	X	X	X	X
29531	PARANOID TYPE SCHIZOPHRENIA, SUBCHRONIC	PSYCHIATRY	X	X	X	X
29532	PARANOID TYPE SCHIZOPHRENIA, CHRONIC	PSYCHIATRY	X	X	X	X
29533	PARANOID TYPE SCHIZOPHRENIA, SUBCHRONIC WITH ACUTE	PSYCHIATRY	X	X	X	X
29534	PARANOID TYPE SCHIZOPHRENIA, CHRONIC WITH ACUTE EX	PSYCHIATRY	X	X	X	X
29535	PARANOID TYPE SCHIZOPHRENIA, IN REMISSION	PSYCHIATRY	X	X	X	X
29540	SCHIZOPHRENIFORM DISORDER, UNSPECIFIED	PSYCHIATRY	X	X	X	X
29541	SCHIZOPHRENIFORM DISORDER, SUBCHRONIC	PSYCHIATRY	X	X	X	X
29542	SCHIZOPHRENIFORM DISORDER, CHRONIC	PSYCHIATRY	X	X	X	X
29543	SCHIZOPHRENIFORM DISORDER, SUBCHRONIC WITH ACUTE E	PSYCHIATRY	X	X	X	X
29544	SCHIZOPHRENIFORM DISORDER, CHRONIC WITH ACUTE EXAC	PSYCHIATRY	X	X	X	X
29545	SCHIZOPHRENIFORM DISORDER, IN REMISSION	PSYCHIATRY	X	X	X	X
29550	LATENT SCHIZOPHRENIA, UNSPECIFIED	PSYCHIATRY	X	X	X	X
29551	LATENT SCHIZOPHRENIA, SUBCHRONIC	PSYCHIATRY	X	X	X	X
29552	LATENT SCHIZOPHRENIA, CHRONIC	PSYCHIATRY	X	X	X	X
29553	LATENT SCHIZOPHRENIA, SUBCHRONIC WITH ACUTE EXACER	PSYCHIATRY	X	X	X	X
29554	LATENT SCHIZOPHRENIA, CHRONIC WITH ACUTE EXACERBAT	PSYCHIATRY	X	X	X	X
29555	LATENT SCHIZOPHRENIA, IN REMISSION	PSYCHIATRY	X	X	X	X
29560	SCHIZOPHRENIC DISORDERS, RESIDUAL TYPE, UNSPECIFIE	PSYCHIATRY	X	X	X	X
29561	SCHIZOPHRENIC DISORDERS, RESIDUAL TYPE, SUBCHRONIC	PSYCHIATRY	X	X	X	X
29562	SCHIZOPHRENIC DISORDERS, RESIDUAL TYPE, CHRONIC	PSYCHIATRY	X	X	X	X
29563	SCHIZOPHRENIC DISORDERS, RESIDUAL TYPE, SUBCHRONIC	PSYCHIATRY	X	X	X	X
29564	SCHIZOPHRENIC DISORDERS, RESIDUAL TYPE, CHRONIC WI	PSYCHIATRY	X	X	X	X
29565	SCHIZOPHRENIC DISORDERS, RESIDUAL TYPE, IN REMISSI	PSYCHIATRY	X	X	X	X
29570	SCHIZOAFFECTIVE DISORDER, UNSPECIFIED	PSYCHIATRY	X	X	X	X
29571	SCHIZOAFFECTIVE DISORDER, SUBCHRONIC	PSYCHIATRY	X	X	X	X
29572	SCHIZOAFFECTIVE DISORDER, CHRONIC	PSYCHIATRY	X	X	X	X
29573	SCHIZOAFFECTIVE DISORDER, SUBCHRONIC WITH ACUTE EX	PSYCHIATRY	X	X	X	X
29574	SCHIZOAFFECTIVE DISORDER, CHRONIC WITH ACUTE EXACE	PSYCHIATRY	X	X	X	X
29575	SCHIZOAFFECTIVE DISORDER, IN REMISSION	PSYCHIATRY	X	X	X	X
29580	OTHER SPECIFIED TYPES OF SCHIZOPHRENIA, UNSPECIFIE	PSYCHIATRY	X	X	X	X
29581	OTHER SPECIFIED TYPES OF SCHIZOPHRENIA, SUBCHRONIC	PSYCHIATRY	X	X	X	X
29582	OTHER SPECIFIED TYPES OF SCHIZOPHRENIA, CHRONIC	PSYCHIATRY	X	X	X	X
29583	OTHER SPECIFIED TYPES OF SCHIZOPHRENIA, SUBCHRONIC	PSYCHIATRY	X	X	X	X
29584	OTHER SPECIFIED TYPES OF SCHIZOPHRENIA, CHRONIC WI	PSYCHIATRY	X	X	X	X
29585	OTHER SPECIFIED TYPES OF SCHIZOPHRENIA, IN REMISSI	PSYCHIATRY	X	X	X	X
29590	UNSPECIFIED SCHIZOPHRENIA, UNSPECIFIED	PSYCHIATRY	X	X	X	X
29591	UNSPECIFIED SCHIZOPHRENIA, SUBCHRONIC	PSYCHIATRY	X	X	X	X
29592	UNSPECIFIED SCHIZOPHRENIA, CHRONIC	PSYCHIATRY	X	X	X	X
29593	UNSPECIFIED SCHIZOPHRENIA, SUBCHRONIC WITH ACUTE E	PSYCHIATRY	X	X	X	X
29594	UNSPECIFIED SCHIZOPHRENIA, CHRONIC WITH ACUTE EXAC	PSYCHIATRY	X	X	X	X
29595	UNSPECIFIED SCHIZOPHRENIA, IN REMISSION	PSYCHIATRY	X	X	X	X
29600	BIPOLAR I DISORDER, SINGLE MANIC EPISODE, UNSPECIF	PSYCHIATRY	X	X	X	X
29601	BIPOLAR I DISORDER, SINGLE MANIC EPISODE, MILD	PSYCHIATRY	X	X	X	X
29602	BIPOLAR I DISORDER, SINGLE MANIC EPISODE, MODERATE	PSYCHIATRY	X	X	X	X
29603	BIPOLAR I DISORDER, SINGLE MANIC EPISODE, SEVERE,	PSYCHIATRY	X	X	X	X
29604	BIPOLAR I DISORDER, SINGLE MANIC EPISODE, SEVERE,	PSYCHIATRY	X	X	X	X
29605	BIPOLAR I DISORDER, SINGLE MANIC EPISODE, IN PARTI	PSYCHIATRY	X	X	X	X
29606	BIPOLAR I DISORDER, SINGLE MANIC EPISODE, IN FULL	PSYCHIATRY	X	X	X	X
29610	MANIC DISORDER, RECURRENT EPISODE, UNSPECIFIED	PSYCHIATRY	X	X	X	X
29611	MANIC DISORDER, RECURRENT EPISODE, MILD	PSYCHIATRY	X	X	X	X
29612	MANIC DISORDER, RECURRENT EPISODE, MODERATE	PSYCHIATRY	X	X	X	X
29613	MANIC DISORDER, RECURRENT EPISODE, SEVERE, WITHOUT	PSYCHIATRY	X	X	X	X
29614	MANIC DISORDER, RECURRENT EPISODE, SEVERE, SPECIFI	PSYCHIATRY	X	X	X	X
29615	MANIC DISORDER, RECURRENT EPISODE, IN PARTIAL OR U	PSYCHIATRY	X	X	X	X
29616	MANIC DISORDER, RECURRENT EPISODE, IN FULL REMISSI	PSYCHIATRY	X	X	X	X
29620	MAJOR DEPRESSIVE DISORDER, SINGLE EPISODE, UNSPECI	PSYCHIATRY	X	X	X	X
29621	MAJOR DEPRESSIVE DISORDER, SINGLE EPISODE, MILD	PSYCHIATRY	X	X	X	X
29622	MAJOR DEPRESSIVE DISORDER, SINGLE EPISODE, MODERAT	PSYCHIATRY	X	X	X	X
29623	MAJOR DEPRESSIVE DISORDER, SINGLE EPISODE, SEVERE,	PSYCHIATRY	X	X	X	X
29624	MAJOR DEPRESSIVE DISORDER, SINGLE EPISODE, SEVERE,	PSYCHIATRY	X	X	X	X
29625	MAJOR DEPRESSIVE DISORDER, SINGLE EPISODE, IN PART	PSYCHIATRY	X	X	X	X
29626	MAJOR DEPRESSIVE DISORDER, SINGLE EPISODE IN FULL	PSYCHIATRY	X	X	X	X
29630	MAJOR DEPRESSIVE DISORDER, RECURRENT EPISODE, UNSP	PSYCHIATRY	X	X	X	X
29631	MAJOR DEPRESSIVE DISORDER, RECURRENT EPISODE, MILD	PSYCHIATRY	X	X	X	X
29632	MAJOR DEPRESSIVE DISORDER, RECURRENT EPISODE, MODE	PSYCHIATRY	X	X	X	X
29633	MAJOR DEPRESSIVE DISORDER, RECURRENT EPISODE, SEVE	PSYCHIATRY	X	X	X	X
29634	MAJOR DEPRESSIVE DISORDER, RECURRENT EPISODE, SEVE	PSYCHIATRY	X	X	X	X
29635	MAJOR DEPRESSIVE DISORDER, RECURRENT EPISODE, IN P	PSYCHIATRY	X	X	X	X
29636	MAJOR DEPRESSIVE DISORDER, RECURRENT EPISODE, IN F	PSYCHIATRY	X	X	X	X
29640	BIPOLAR I DISORDER, MOST RECENT EPISODE (OR CURREN	PSYCHIATRY	X	X	X	X
29641	BIPOLAR I DISORDER, MOST RECENT EPISODE (OR CURREN	PSYCHIATRY	X	X	X	X
29642	BIPOLAR I DISORDER, MOST RECENT EPISODE (OR CURREN	PSYCHIATRY	X	X	X	X
29643	BIPOLAR I DISORDER, MOST RECENT EPISODE (OR CURREN	PSYCHIATRY	X	X	X	X
29644	BIPOLAR I DISORDER, MOST RECENT EPISODE (OR CURREN	PSYCHIATRY	X	X	X	X
29645	BIPOLAR I DISORDER, MOST RECENT EPISODE (OR CURREN	PSYCHIATRY	X	X	X	X
29646	BIPOLAR I DISORDER, MOST RECENT EPISODE (OR CURREN	PSYCHIATRY	X	X	X	X
29650	BIPOLAR I DISORDER, MOST RECENT EPISODE (OR CURREN	PSYCHIATRY	X	X	X	X
29651	BIPOLAR I DISORDER, MOST RECENT EPISODE (OR CURREN	PSYCHIATRY	X	X	X	X
29652	BIPOLAR I DISORDER, MOST RECENT EPISODE (OR CURREN	PSYCHIATRY	X	X	X	X
29653	BIPOLAR I DISORDER, MOST RECENT EPISODE (OR CURREN	PSYCHIATRY	X	X	X	X
29654	BIPOLAR I DISORDER, MOST RECENT EPISODE (OR CURREN	PSYCHIATRY	X	X	X	X
29655	BIPOLAR I DISORDER, MOST RECENT EPISODE (OR CURREN	PSYCHIATRY	X	X	X	X
29656	BIPOLAR I DISORDER, MOST RECENT EPISODE (OR CURREN	PSYCHIATRY	X	X	X	X
29660	BIPOLAR I DISORDER, MOST RECENT EPISODE (OR CURREN	PSYCHIATRY	X	X	X	X
29661	BIPOLAR I DISORDER, MOST RECENT EPISODE (OR CURREN	PSYCHIATRY	X	X	X	X
29662	BIPOLAR I DISORDER, MOST RECENT EPISODE (OR CURREN	PSYCHIATRY	X	X	X	X
29663	BIPOLAR I DISORDER, MOST RECENT EPISODE (OR CURREN	PSYCHIATRY	X	X	X	X
29664	BIPOLAR I DISORDER, MOST RECENT EPISODE (OR CURREN	PSYCHIATRY	X	X	X	X
29665	BIPOLAR I DISORDER, MOST RECENT EPISODE (OR CURREN	PSYCHIATRY	X	X	X	X
29666	BIPOLAR I DISORDER, MOST RECENT EPISODE (OR CURREN	PSYCHIATRY	X	X	X	X
2967	BIPOLAR I DISORDER, MOST RECENT EPISODE (OR CURREN	PSYCHIATRY	X	X	X	X
29680	BIPOLAR DISORDER, UNSPECIFIED	PSYCHIATRY	X	X	X	X
29681	ATYPICAL MANIC DISORDER	PSYCHIATRY	X	X	X	X
29682	ATYPICAL DEPRESSIVE DISORDER	PSYCHIATRY	X	X	X	X
29689	OTHER AND UNSPECIFIED BIPOLAR DISORDERS, OTHER	PSYCHIATRY	X	X	X	X
29690	UNSPECIFIED EPISODIC MOOD DISORDER	PSYCHIATRY	X	X	X	X
29699	OTHER SPECIFIED EPISODIC MOOD DISORDER	PSYCHIATRY	X	X	X	X
2970	PARANOID STATE, SIMPLE	PSYCHIATRY	X	X	X	X
2971	DELUSIONAL DISORDER	PSYCHIATRY	X	X	X	X
2972	PARAPHRENIA	PSYCHIATRY	X	X	X	X
2973	SHARED PSYCHOTIC DISORDER	PSYCHIATRY	X	X	X	X
2978	OTHER SPECIFIED PARANOID STATES	PSYCHIATRY	X	X	X	X
2979	UNSPECIFIED PARANOID STATE	PSYCHIATRY	X	X	X	X
2980	DEPRESSIVE TYPE PSYCHOSIS	PSYCHIATRY	X	X	X	X
2981	EXCITATIVE TYPE PSYCHOSIS	PSYCHIATRY	X	X	X	X
2982	REACTIVE CONFUSION	PSYCHIATRY	X	X	X	X
2983	ACUTE PARANOID REACTION	PSYCHIATRY	X	X	X	X
2984	PSYCHOGENIC PARANOID PSYCHOSIS	PSYCHIATRY	X	X	X	X
2988	OTHER AND UNSPECIFIED REACTIVE PSYCHOSIS	PSYCHIATRY	X	X	X	X
2989	UNSPECIFIED PSYCHOSIS	PSYCHIATRY	X	X	X	X
29900	AUTISTIC DISORDER, CURRENT OR ACTIVE STATE	PSYCHIATRY	X	X	X	X
29901	AUTISTIC DISORDER, RESIDUAL STATE	PSYCHIATRY	X	X	X	X
29910	CHILDHOOD DISINTEGRATIVE DISORDER, CURRENT OR ACTI	PSYCHIATRY	X	X	X	X
29911	CHILDHOOD DISINTEGRATIVE DISORDER, RESIDUAL STATE	PSYCHIATRY	X	X	X	X
29980	OTHER SPECIFIED PERVASIVE DEVELOPMENTAL DISORDERS,	PSYCHIATRY	X	X	X	X
29981	OTHER SPECIFIED PERVASIVE DEVELOPMENTAL DISORDERS,	PSYCHIATRY	X	X	X	X
29990	UNSPECIFIED PERVASIVE DEVELOPMENTAL DISORDER, CURR	PSYCHIATRY	X	X	X	X
29991	UNSPECIFIED PERVASIVE DEVELOPMENTAL DISORDER, RESI	PSYCHIATRY	X	X	X	X
30000	ANXIETY STATE, UNSPECIFIED	PSYCHIATRY	X	X	X	X
30001	PANIC DISORDER WITHOUT AGORAPHOBIA	PSYCHIATRY	X	X	X	X
30002	GENERALIZED ANXIETY DISORDER	PSYCHIATRY	X	X	X	X
30009	OTHER ANXIETY STATES	PSYCHIATRY	X	X	X	X
30010	HYSTERIA, UNSPECIFIED	PSYCHIATRY	X	X	X	X
30011	CONVERSION DISORDER	PSYCHIATRY	X	X	X	X
30012	DISSOCIATIVE AMNESIA	PSYCHIATRY	X	X	X	X
30013	DISSOCIATIVE FUGUE	PSYCHIATRY	X	X	X	X
30014	DISSOCIATIVE IDENTITY DISORDER	PSYCHIATRY	X	X	X	X
30015	DISSOCIATIVE DISORDER OR REACTION, UNSPECIFIED	PSYCHIATRY	X	X	X	X
30016	FACTITIOUS DISORDER WITH PREDOMINANTLY PSYCHOLOGIC	PSYCHIATRY	X	X	X	X
30019	OTHER AND UNSPECIFIED FACTITIOUS ILLNESS	PSYCHIATRY	X	X	X	X
30020	PHOBIA, UNSPECIFIED	PSYCHIATRY	X	X	X	X
30021	AGORAPHOBIA WITH PANIC DISORDER	PSYCHIATRY	X	X	X	X
30022	AGORAPHOBIA WITHOUT MENTION OF PANIC ATTACKS	PSYCHIATRY	X	X	X	X
30023	SOCIAL PHOBIA	PSYCHIATRY	X	X	X	X
30029	OTHER ISOLATED OR SPECIFIC PHOBIAS	PSYCHIATRY	X	X	X	X
3003	OBSESSIVE-COMPULSIVE DISORDERS	PSYCHIATRY	X	X	X	X
3004	DYSTHYMIC DISORDER	PSYCHIATRY	X	X	X	X
3005	NEURASTHENIA	PSYCHIATRY	X	X	X	X
3006	DEPERSONALIZATION DISORDER	PSYCHIATRY	X	X	X	X
3007	HYPOCHONDRIASIS	PSYCHIATRY	X	X	X	X
30081	SOMATIZATION DISORDER	PSYCHIATRY	X	X	X	X
30082	UNDIFFERENTIATED SOMATOFORM DISORDER	PSYCHIATRY	X	X	X	X
30089	OTHER SOMATOFORM DISORDERS	PSYCHIATRY	X	X	X	X
3009	UNSPECIFIED NONPSYCHOTIC MENTAL DISORDER	PSYCHIATRY	X	X	X	X
3010	PARANOID PERSONALITY DISORDER	PSYCHIATRY	X	X	X	X
30110	AFFECTIVE PERSONALITY DISORDER, UNSPECIFIED	PSYCHIATRY	X	X	X	X
30111	CHRONIC HYPOMANIC PERSONALITY DISORDER	PSYCHIATRY	X	X	X	X
30112	CHRONIC DEPRESSIVE PERSONALITY DISORDER	PSYCHIATRY	X	X	X	X
30113	CYCLOTHYMIC DISORDER	PSYCHIATRY	X	X	X	X
30120	SCHIZOID PERSONALITY DISORDER, UNSPECIFIED	PSYCHIATRY	X	X	X	X
30121	INTROVERTED PERSONALITY	PSYCHIATRY	X	X	X	X
30122	SCHIZOTYPAL PERSONALITY DISORDER	PSYCHIATRY	X	X	X	X
3013	EXPLOSIVE PERSONALITY DISORDER	PSYCHIATRY	X	X	X	X
3014	OBSESSIVE-COMPULSIVE PERSONALITY DISORDER	PSYCHIATRY	X	X	X	X
30150	HISTRIONIC PERSONALITY DISORDER, UNSPECIFIED	PSYCHIATRY	X	X	X	X
30151	CHRONIC FACTITIOUS ILLNESS WITH PHYSICAL SYMPTOMS	PSYCHIATRY	X	X	X	X
30159	OTHER HISTRIONIC PERSONALITY DISORDER	PSYCHIATRY	X	X	X	X
3016	DEPENDENT PERSONALITY DISORDER	PSYCHIATRY	X	X	X	X
3017	ANTISOCIAL PERSONALITY DISORDER	PSYCHIATRY	X	X	X	X
30181	NARCISSISTIC PERSONALITY DISORDER	PSYCHIATRY	X	X	X	X
30182	AVOIDANT PERSONALITY DISORDER	PSYCHIATRY	X	X	X	X
30183	BORDERLINE PERSONALITY DISORDER	PSYCHIATRY	X	X	X	X
30184	PASSIVE-AGGRESSIVE PERSONALITY	PSYCHIATRY	X	X	X	X
30189	OTHER PERSONALITY DISORDERS	PSYCHIATRY	X	X	X	X
3019	UNSPECIFIED PERSONALITY DISORDER	PSYCHIATRY	X	X	X	X
3020	EGO-DYSTONIC SEXUAL ORIENTATION	PSYCHIATRY	X	X	X	X
3021	ZOOPHILIA	PSYCHIATRY	X	X	X	X
3022	PEDOPHILIA	PSYCHIATRY	X	X	X	X
3023	TRANSVESTIC FETISHISM	PSYCHIATRY	X	X	X	X
3024	EXHIBITIONISM	PSYCHIATRY	X	X	X	X
30250	TRANS-SEXUALISM WITH UNSPECIFIED SEXUAL HISTORY	PSYCHIATRY	X	X	X	X
30251	TRANS-SEXUALISM WITH ASEXUAL HISTORY	PSYCHIATRY	X	X	X	X
30252	TRANS-SEXUALISM WITH HOMOSEXUAL HISTORY	PSYCHIATRY	X	X	X	X
30253	TRANS-SEXUALISM WITH HETEROSEXUAL HISTORY	PSYCHIATRY	X	X	X	X
3026	GENDER IDENTITY DISORDER IN CHILDREN	PSYCHIATRY	X	X	X	X
30270	PSYCHOSEXUAL DYSFUNCTION, UNSPECIFIED	PSYCHIATRY	X	X	X	X
30271	HYPOACTIVE SEXUAL DESIRE DISORDER	PSYCHIATRY	X	X	X	X
30272	PSYCHOSEXUAL DYSFUNCTION WITH INHIBITED SEXUAL EXC	PSYCHIATRY	X	X	X	X
30273	FEMALE ORGASMIC DISORDER	PSYCHIATRY	X	X	X	X
30274	MALE ORGASMIC DISORDER	PSYCHIATRY	X	X	X	X
30275	PREMATURE EJACULATION	PSYCHIATRY	X	X	X	X
30276	DYSPAREUNIA, PSYCHOGENIC	PSYCHIATRY	X	X	X	X
30279	PSYCHOSEXUAL DYSFUNCTION WITH OTHER SPECIFIED PSYC	PSYCHIATRY	X	X	X	X
30281	FETISHISM	PSYCHIATRY	X	X	X	X
30282	VOYEURISM	PSYCHIATRY	X	X	X	X
30283	SEXUAL MASOCHISM	PSYCHIATRY	X	X	X	X
30284	SEXUAL SADISM	PSYCHIATRY	X	X	X	X
30285	GENDER IDENTITY DISORDER IN ADOLESCENTS OR ADULTS	PSYCHIATRY	X	X	X	X
[truncated: 11,292 more rows]

## Sheet: MSDRG
MSDRG	MSDRG NAME	PRODUCT	MDC	MDC NAME	FY 2008	FY 2009	FY 2010	FY 2011	FY 2012
1	HEART TRANSPLANT OR IMPLANT OF HEART ASSIST SYSTEM W MCC	THORACIC SURGERY	0	UNGROUPABLE	X	X	X	X	X
2	HEART TRANSPLANT OR IMPLANT OF HEART ASSIST SYSTEM W/O MCC	THORACIC SURGERY	0	UNGROUPABLE	X	X	X	X	X
3	ECMO OR TRACH W MV 96+ HRS OR PDX EXC FACE, MOUTH & NECK W MAJ O.R.	THORACIC SURGERY	0	UNGROUPABLE	X	X	X	X	X
4	TRACH W MV 96+ HRS OR PDX EXC FACE, MOUTH & NECK W/O MAJ O.R.	THORACIC SURGERY	0	UNGROUPABLE	X	X	X	X	X
5	LIVER TRANSPLANT W MCC OR INTESTINAL TRANSPLANT	GENERAL SURGERY			X	X	X	X	X
6	LIVER TRANSPLANT W/O MCC	GENERAL SURGERY			X	X	X	X	X
7	LUNG TRANSPLANT	THORACIC SURGERY	0	UNGROUPABLE	X	X	X	X	X
8	SIMULTANEOUS PANCREAS/KIDNEY TRANSPLANT	GENERAL SURGERY			X	X	X	X	X
9	BONE MARROW TRANSPLANT	GENERAL SURGERY			X	X	X
10	PANCREAS TRANSPLANT	GENERAL SURGERY			X	X	X	X	X
11	TRACHEOSTOMY FOR FACE,MOUTH & NECK DIAGNOSES W MCC	THORACIC SURGERY	0	UNGROUPABLE	X	X	X	X	X
12	TRACHEOSTOMY FOR FACE,MOUTH & NECK DIAGNOSES W CC	THORACIC SURGERY	0	UNGROUPABLE	X	X	X	X	X
13	TRACHEOSTOMY FOR FACE,MOUTH & NECK DIAGNOSES W/O CC/MCC	THORACIC SURGERY	0	UNGROUPABLE	X	X	X	X	X
14	ALLOGENEIC BONE MARROW TRANSPLANT	GENERAL SURGERY						X	X
15	AUTOLOGOUS BONE MARROW TRANSPLANT	GENERAL SURGERY						X
16	AUTOLOGOUS BONE MARROW TRANSPLANT W CC/MCC	GENERAL SURGERY							X
17	AUTOLOGOUS BONE MARROW TRANSPLANT W/O CC/MCC	GENERAL SURGERY							X
34	CAROTID ARTERY STENT PROCEDURE W MCC	VASCULAR SURGERY	1	DISEASES AND DISORDERS OF THE NERVOUS SYSTEM	X	X	X	X	X
35	CAROTID ARTERY STENT PROCEDURE W CC	VASCULAR SURGERY	1	DISEASES AND DISORDERS OF THE NERVOUS SYSTEM	X	X	X	X	X
36	CAROTID ARTERY STENT PROCEDURE W/O CC/MCC	VASCULAR SURGERY	1	DISEASES AND DISORDERS OF THE NERVOUS SYSTEM	X	X	X	X	X
37	EXTRACRANIAL PROCEDURES W MCC	VASCULAR SURGERY	1	DISEASES AND DISORDERS OF THE NERVOUS SYSTEM	X	X	X	X	X
38	EXTRACRANIAL PROCEDURES W CC	VASCULAR SURGERY	1	DISEASES AND DISORDERS OF THE NERVOUS SYSTEM	X	X	X	X	X
39	EXTRACRANIAL PROCEDURES W/O CC/MCC	VASCULAR SURGERY	1	DISEASES AND DISORDERS OF THE NERVOUS SYSTEM	X	X	X	X	X
52	SPINAL DISORDERS & INJURIES W CC/MCC	NEUROLOGY	1	DISEASES AND DISORDERS OF THE NERVOUS SYSTEM	X	X	X	X	X
53	SPINAL DISORDERS & INJURIES W/O CC/MCC	NEUROLOGY	1	DISEASES AND DISORDERS OF THE NERVOUS SYSTEM	X	X	X	X	X
54	NERVOUS SYSTEM NEOPLASMS W MCC	ONCOLOGY MEDICAL	1	DISEASES AND DISORDERS OF THE NERVOUS SYSTEM	X	X	X	X	X
55	NERVOUS SYSTEM NEOPLASMS W/O MCC	ONCOLOGY MEDICAL	1	DISEASES AND DISORDERS OF THE NERVOUS SYSTEM	X	X	X	X	X
56	DEGENERATIVE NERVOUS SYSTEM DISORDERS W MCC	NEUROLOGY	1	DISEASES AND DISORDERS OF THE NERVOUS SYSTEM	X	X	X	X	X
57	DEGENERATIVE NERVOUS SYSTEM DISORDERS W/O MCC	NEUROLOGY	1	DISEASES AND DISORDERS OF THE NERVOUS SYSTEM	X	X	X	X	X
58	MULTIPLE SCLEROSIS & CEREBELLAR ATAXIA W MCC	NEUROLOGY	1	DISEASES AND DISORDERS OF THE NERVOUS SYSTEM	X	X	X	X	X
59	MULTIPLE SCLEROSIS & CEREBELLAR ATAXIA W CC	NEUROLOGY	1	DISEASES AND DISORDERS OF THE NERVOUS SYSTEM	X	X	X	X	X
60	MULTIPLE SCLEROSIS & CEREBELLAR ATAXIA W/O CC/MCC	NEUROLOGY	1	DISEASES AND DISORDERS OF THE NERVOUS SYSTEM	X	X	X	X	X
61	ACUTE ISCHEMIC STROKE W USE OF THROMBOLYTIC AGENT W MCC	NEUROLOGY	1	DISEASES AND DISORDERS OF THE NERVOUS SYSTEM	X	X	X	X	X
62	ACUTE ISCHEMIC STROKE W USE OF THROMBOLYTIC AGENT W CC	NEUROLOGY	1	DISEASES AND DISORDERS OF THE NERVOUS SYSTEM	X	X	X	X	X
63	ACUTE ISCHEMIC STROKE W USE OF THROMBOLYTIC AGENT W/O CC/MCC	NEUROLOGY	1	DISEASES AND DISORDERS OF THE NERVOUS SYSTEM	X	X	X	X	X
64	INTRACRANIAL HEMORRHAGE OR CEREBRAL INFARCTION W MCC	NEUROLOGY	1	DISEASES AND DISORDERS OF THE NERVOUS SYSTEM	X	X	X	X	X
65	INTRACRANIAL HEMORRHAGE OR CEREBRAL INFARCTION W CC	NEUROLOGY	1	DISEASES AND DISORDERS OF THE NERVOUS SYSTEM	X	X	X	X	X
66	INTRACRANIAL HEMORRHAGE OR CEREBRAL INFARCTION W/O CC/MCC	NEUROLOGY	1	DISEASES AND DISORDERS OF THE NERVOUS SYSTEM	X	X	X	X	X
67	NONSPECIFIC CVA & PRECEREBRAL OCCLUSION W/O INFARCT W MCC	NEUROLOGY	1	DISEASES AND DISORDERS OF THE NERVOUS SYSTEM	X	X	X	X	X
68	NONSPECIFIC CVA & PRECEREBRAL OCCLUSION W/O INFARCT W/O MCC	NEUROLOGY	1	DISEASES AND DISORDERS OF THE NERVOUS SYSTEM	X	X	X	X	X
69	TRANSIENT ISCHEMIA	NEUROLOGY	1	DISEASES AND DISORDERS OF THE NERVOUS SYSTEM	X	X	X	X	X
70	NONSPECIFIC CEREBROVASCULAR DISORDERS W MCC	NEUROLOGY	1	DISEASES AND DISORDERS OF THE NERVOUS SYSTEM	X	X	X	X	X
71	NONSPECIFIC CEREBROVASCULAR DISORDERS W CC	NEUROLOGY	1	DISEASES AND DISORDERS OF THE NERVOUS SYSTEM	X	X	X	X	X
72	NONSPECIFIC CEREBROVASCULAR DISORDERS W/O CC/MCC	NEUROLOGY	1	DISEASES AND DISORDERS OF THE NERVOUS SYSTEM	X	X	X	X	X
73	CRANIAL & PERIPHERAL NERVE DISORDERS W MCC	NEUROLOGY	1	DISEASES AND DISORDERS OF THE NERVOUS SYSTEM	X	X	X	X	X
74	CRANIAL & PERIPHERAL NERVE DISORDERS W/O MCC	NEUROLOGY	1	DISEASES AND DISORDERS OF THE NERVOUS SYSTEM	X	X	X	X	X
75	VIRAL MENINGITIS W CC/MCC	NEUROLOGY	1	DISEASES AND DISORDERS OF THE NERVOUS SYSTEM	X	X	X	X	X
76	VIRAL MENINGITIS W/O CC/MCC	NEUROLOGY	1	DISEASES AND DISORDERS OF THE NERVOUS SYSTEM	X	X	X	X	X
77	HYPERTENSIVE ENCEPHALOPATHY W MCC	NEUROLOGY	1	DISEASES AND DISORDERS OF THE NERVOUS SYSTEM	X	X	X	X	X
78	HYPERTENSIVE ENCEPHALOPATHY W CC	NEUROLOGY	1	DISEASES AND DISORDERS OF THE NERVOUS SYSTEM	X	X	X	X	X
79	HYPERTENSIVE ENCEPHALOPATHY W/O CC/MCC	NEUROLOGY	1	DISEASES AND DISORDERS OF THE NERVOUS SYSTEM	X	X	X	X	X
80	NONTRAUMATIC STUPOR & COMA W MCC	NEUROLOGY	1	DISEASES AND DISORDERS OF THE NERVOUS SYSTEM	X	X	X	X	X
81	NONTRAUMATIC STUPOR & COMA W/O MCC	NEUROLOGY	1	DISEASES AND DISORDERS OF THE NERVOUS SYSTEM	X	X	X	X	X
82	TRAUMATIC STUPOR & COMA, COMA >1 HR W MCC	NEUROLOGY	1	DISEASES AND DISORDERS OF THE NERVOUS SYSTEM	X	X	X	X	X
83	TRAUMATIC STUPOR & COMA, COMA >1 HR W CC	NEUROLOGY	1	DISEASES AND DISORDERS OF THE NERVOUS SYSTEM	X	X	X	X	X
84	TRAUMATIC STUPOR & COMA, COMA >1 HR W/O CC/MCC	NEUROLOGY	1	DISEASES AND DISORDERS OF THE NERVOUS SYSTEM	X	X	X	X	X
85	TRAUMATIC STUPOR & COMA, COMA <1 HR W MCC	NEUROLOGY	1	DISEASES AND DISORDERS OF THE NERVOUS SYSTEM	X	X	X	X	X
86	TRAUMATIC STUPOR & COMA, COMA <1 HR W CC	NEUROLOGY	1	DISEASES AND DISORDERS OF THE NERVOUS SYSTEM	X	X	X	X	X
87	TRAUMATIC STUPOR & COMA, COMA <1 HR W/O CC/MCC	NEUROLOGY	1	DISEASES AND DISORDERS OF THE NERVOUS SYSTEM	X	X	X	X	X
88	CONCUSSION W MCC	NEUROLOGY	1	DISEASES AND DISORDERS OF THE NERVOUS SYSTEM	X	X	X	X	X
89	CONCUSSION W CC	NEUROLOGY	1	DISEASES AND DISORDERS OF THE NERVOUS SYSTEM	X	X	X	X	X
90	CONCUSSION W/O CC/MCC	NEUROLOGY	1	DISEASES AND DISORDERS OF THE NERVOUS SYSTEM	X	X	X	X	X
91	OTHER DISORDERS OF NERVOUS SYSTEM W MCC	NEUROLOGY	1	DISEASES AND DISORDERS OF THE NERVOUS SYSTEM	X	X	X	X	X
92	OTHER DISORDERS OF NERVOUS SYSTEM W CC	NEUROLOGY	1	DISEASES AND DISORDERS OF THE NERVOUS SYSTEM	X	X	X	X	X
93	OTHER DISORDERS OF NERVOUS SYSTEM W/O CC/MCC	NEUROLOGY	1	DISEASES AND DISORDERS OF THE NERVOUS SYSTEM	X	X	X	X	X
94	BACTERIAL & TUBERCULOUS INFECTIONS OF NERVOUS SYSTEM W MCC	NEUROLOGY	1	DISEASES AND DISORDERS OF THE NERVOUS SYSTEM	X	X	X	X	X
95	BACTERIAL & TUBERCULOUS INFECTIONS OF NERVOUS SYSTEM W CC	NEUROLOGY	1	DISEASES AND DISORDERS OF THE NERVOUS SYSTEM	X	X	X	X	X
96	BACTERIAL & TUBERCULOUS INFECTIONS OF NERVOUS SYSTEM W/O CC/MCC	NEUROLOGY	1	DISEASES AND DISORDERS OF THE NERVOUS SYSTEM	X	X	X	X	X
97	NON-BACTERIAL INFECT OF NERVOUS SYS EXC VIRAL MENINGITIS W MCC	NEUROLOGY	1	DISEASES AND DISORDERS OF THE NERVOUS SYSTEM	X	X	X	X	X
98	NON-BACTERIAL INFECT OF NERVOUS SYS EXC VIRAL MENINGITIS W CC	NEUROLOGY	1	DISEASES AND DISORDERS OF THE NERVOUS SYSTEM	X	X	X	X	X
99	NON-BACTERIAL INFECT OF NERVOUS SYS EXC VIRAL MENINGITIS W/O CC/MCC	NEUROLOGY	1	DISEASES AND DISORDERS OF THE NERVOUS SYSTEM	X	X	X	X	X
100	SEIZURES W MCC	NEUROLOGY	1	DISEASES AND DISORDERS OF THE NERVOUS SYSTEM	X	X	X	X	X
101	SEIZURES W/O MCC	NEUROLOGY	1	DISEASES AND DISORDERS OF THE NERVOUS SYSTEM	X	X	X	X	X
102	HEADACHES W MCC	NEUROLOGY	1	DISEASES AND DISORDERS OF THE NERVOUS SYSTEM	X	X	X	X	X
103	HEADACHES W/O MCC	NEUROLOGY	1	DISEASES AND DISORDERS OF THE NERVOUS SYSTEM	X	X	X	X	X
113	ORBITAL PROCEDURES W CC/MCC	OPHTHALMOLOGY	2	DISEASES AND DISORDERS OF THE EYE	X	X	X	X	X
114	ORBITAL PROCEDURES W/O CC/MCC	OPHTHALMOLOGY	2	DISEASES AND DISORDERS OF THE EYE	X	X	X	X	X
115	EXTRAOCULAR PROCEDURES EXCEPT ORBIT	OPHTHALMOLOGY	2	DISEASES AND DISORDERS OF THE EYE	X	X	X	X	X
116	INTRAOCULAR PROCEDURES W CC/MCC	OPHTHALMOLOGY	2	DISEASES AND DISORDERS OF THE EYE	X	X	X	X	X
117	INTRAOCULAR PROCEDURES W/O CC/MCC	OPHTHALMOLOGY	2	DISEASES AND DISORDERS OF THE EYE	X	X	X	X	X
121	ACUTE MAJOR EYE INFECTIONS W CC/MCC	OPHTHALMOLOGY	2	DISEASES AND DISORDERS OF THE EYE	X	X	X	X	X
122	ACUTE MAJOR EYE INFECTIONS W/O CC/MCC	OPHTHALMOLOGY	2	DISEASES AND DISORDERS OF THE EYE	X	X	X	X	X
123	NEUROLOGICAL EYE DISORDERS	OPHTHALMOLOGY	2	DISEASES AND DISORDERS OF THE EYE	X	X	X	X	X
124	OTHER DISORDERS OF THE EYE W MCC	OPHTHALMOLOGY	2	DISEASES AND DISORDERS OF THE EYE	X	X	X	X	X
125	OTHER DISORDERS OF THE EYE W/O MCC	OPHTHALMOLOGY	2	DISEASES AND DISORDERS OF THE EYE	X	X	X	X	X
129	MAJOR HEAD & NECK PROCEDURES W CC/MCC OR MAJOR DEVICE	OTOLARYNGOLOGY	3	DISEASES AND DISORDERS OF THE EAR, NOSE, MOUTH AND THROAT	X	X	X	X	X
130	MAJOR HEAD & NECK PROCEDURES W/O CC/MCC	OTOLARYNGOLOGY	3	DISEASES AND DISORDERS OF THE EAR, NOSE, MOUTH AND THROAT	X	X	X	X	X
131	CRANIAL/FACIAL PROCEDURES W CC/MCC	OTOLARYNGOLOGY	3	DISEASES AND DISORDERS OF THE EAR, NOSE, MOUTH AND THROAT	X	X	X	X	X
132	CRANIAL/FACIAL PROCEDURES W/O CC/MCC	OTOLARYNGOLOGY	3	DISEASES AND DISORDERS OF THE EAR, NOSE, MOUTH AND THROAT	X	X	X	X	X
133	OTHER EAR, NOSE, MOUTH & THROAT O.R. PROCEDURES W CC/MCC	OTOLARYNGOLOGY	3	DISEASES AND DISORDERS OF THE EAR, NOSE, MOUTH AND THROAT	X	X	X	X	X
134	OTHER EAR, NOSE, MOUTH & THROAT O.R. PROCEDURES W/O CC/MCC	OTOLARYNGOLOGY	3	DISEASES AND DISORDERS OF THE EAR, NOSE, MOUTH AND THROAT	X	X	X	X	X
135	SINUS & MASTOID PROCEDURES W CC/MCC	OTOLARYNGOLOGY	3	DISEASES AND DISORDERS OF THE EAR, NOSE, MOUTH AND THROAT	X	X	X	X	X
136	SINUS & MASTOID PROCEDURES W/O CC/MCC	OTOLARYNGOLOGY	3	DISEASES AND DISORDERS OF THE EAR, NOSE, MOUTH AND THROAT	X	X	X	X	X
139	SALIVARY GLAND PROCEDURES	OTOLARYNGOLOGY	3	DISEASES AND DISORDERS OF THE EAR, NOSE, MOUTH AND THROAT	X	X	X	X	X
146	EAR, NOSE, MOUTH & THROAT MALIGNANCY W MCC	ONCOLOGY MEDICAL	3	DISEASES AND DISORDERS OF THE EAR, NOSE, MOUTH AND THROAT	X	X	X	X	X
147	EAR, NOSE, MOUTH & THROAT MALIGNANCY W CC	ONCOLOGY MEDICAL	3	DISEASES AND DISORDERS OF THE EAR, NOSE, MOUTH AND THROAT	X	X	X	X	X
148	EAR, NOSE, MOUTH & THROAT MALIGNANCY W/O CC/MCC	ONCOLOGY MEDICAL	3	DISEASES AND DISORDERS OF THE EAR, NOSE, MOUTH AND THROAT	X	X	X	X	X
149	DYSEQUILIBRIUM	OTOLARYNGOLOGY	3	DISEASES AND DISORDERS OF THE EAR, NOSE, MOUTH AND THROAT	X	X	X	X	X
150	EPISTAXIS W MCC	OTOLARYNGOLOGY	3	DISEASES AND DISORDERS OF THE EAR, NOSE, MOUTH AND THROAT	X	X	X	X	X
151	EPISTAXIS W/O MCC	OTOLARYNGOLOGY	3	DISEASES AND DISORDERS OF THE EAR, NOSE, MOUTH AND THROAT	X	X	X	X	X
152	OTITIS MEDIA & URI W MCC	OTOLARYNGOLOGY	3	DISEASES AND DISORDERS OF THE EAR, NOSE, MOUTH AND THROAT	X	X	X	X	X
153	OTITIS MEDIA & URI W/O MCC	OTOLARYNGOLOGY	3	DISEASES AND DISORDERS OF THE EAR, NOSE, MOUTH AND THROAT	X	X	X	X	X
154	OTHER EAR, NOSE, MOUTH & THROAT DIAGNOSES W MCC	OTOLARYNGOLOGY	3	DISEASES AND DISORDERS OF THE EAR, NOSE, MOUTH AND THROAT	X	X	X	X	X
155	OTHER EAR, NOSE, MOUTH & THROAT DIAGNOSES W CC	OTOLARYNGOLOGY	3	DISEASES AND DISORDERS OF THE EAR, NOSE, MOUTH AND THROAT	X	X	X	X	X
156	OTHER EAR, NOSE, MOUTH & THROAT DIAGNOSES W/O CC/MCC	OTOLARYNGOLOGY	3	DISEASES AND DISORDERS OF THE EAR, NOSE, MOUTH AND THROAT	X	X	X	X	X
163	MAJOR CHEST PROCEDURES W MCC	THORACIC SURGERY	4	DISEASES AND DISORDERS OF THE RESPIRATORY SYSTEM	X	X	X	X	X
164	MAJOR CHEST PROCEDURES W CC	THORACIC SURGERY	4	DISEASES AND DISORDERS OF THE RESPIRATORY SYSTEM	X	X	X	X	X
165	MAJOR CHEST PROCEDURES W/O CC/MCC	THORACIC SURGERY	4	DISEASES AND DISORDERS OF THE RESPIRATORY SYSTEM	X	X	X	X	X
166	OTHER RESP SYSTEM O.R. PROCEDURES W MCC	THORACIC SURGERY	4	DISEASES AND DISORDERS OF THE RESPIRATORY SYSTEM	X	X	X	X	X
167	OTHER RESP SYSTEM O.R. PROCEDURES W CC	THORACIC SURGERY	4	DISEASES AND DISORDERS OF THE RESPIRATORY SYSTEM	X	X	X	X	X
168	OTHER RESP SYSTEM O.R. PROCEDURES W/O CC/MCC	THORACIC SURGERY	4	DISEASES AND DISORDERS OF THE RESPIRATORY SYSTEM	X	X	X	X	X
175	PULMONARY EMBOLISM W MCC	PULMONARY	4	DISEASES AND DISORDERS OF THE RESPIRATORY SYSTEM	X	X	X	X	X
176	PULMONARY EMBOLISM W/O MCC	PULMONARY	4	DISEASES AND DISORDERS OF THE RESPIRATORY SYSTEM	X	X	X	X	X
177	RESPIRATORY INFECTIONS & INFLAMMATIONS W MCC	PULMONARY	4	DISEASES AND DISORDERS OF THE RESPIRATORY SYSTEM	X	X	X	X	X
178	RESPIRATORY INFECTIONS & INFLAMMATIONS W CC	PULMONARY	4	DISEASES AND DISORDERS OF THE RESPIRATORY SYSTEM	X	X	X	X	X
179	RESPIRATORY INFECTIONS & INFLAMMATIONS W/O CC/MCC	PULMONARY	4	DISEASES AND DISORDERS OF THE RESPIRATORY SYSTEM	X	X	X	X	X
180	RESPIRATORY NEOPLASMS W MCC	ONCOLOGY MEDICAL	4	DISEASES AND DISORDERS OF THE RESPIRATORY SYSTEM	X	X	X	X	X
181	RESPIRATORY NEOPLASMS W CC	ONCOLOGY MEDICAL	4	DISEASES AND DISORDERS OF THE RESPIRATORY SYSTEM	X	X	X	X	X
182	RESPIRATORY NEOPLASMS W/O CC/MCC	ONCOLOGY MEDICAL	4	DISEASES AND DISORDERS OF THE RESPIRATORY SYSTEM	X	X	X	X	X
183	MAJOR CHEST TRAUMA W MCC	TRAUMA	4	DISEASES AND DISORDERS OF THE RESPIRATORY SYSTEM	X	X	X	X	X
184	MAJOR CHEST TRAUMA W CC	TRAUMA	4	DISEASES AND DISORDERS OF THE RESPIRATORY SYSTEM	X	X	X	X	X
185	MAJOR CHEST TRAUMA W/O CC/MCC	TRAUMA	4	DISEASES AND DISORDERS OF THE RESPIRATORY SYSTEM	X	X	X	X	X
186	PLEURAL EFFUSION W MCC	PULMONARY	4	DISEASES AND DISORDERS OF THE RESPIRATORY SYSTEM	X	X	X	X	X
187	PLEURAL EFFUSION W CC	PULMONARY	4	DISEASES AND DISORDERS OF THE RESPIRATORY SYSTEM	X	X	X	X	X
188	PLEURAL EFFUSION W/O CC/MCC	PULMONARY	4	DISEASES AND DISORDERS OF THE RESPIRATORY SYSTEM	X	X	X	X	X
189	PULMONARY EDEMA & RESPIRATORY FAILURE	PULMONARY	4	DISEASES AND DISORDERS OF THE RESPIRATORY SYSTEM	X	X	X	X	X
190	CHRONIC OBSTRUCTIVE PULMONARY DISEASE W MCC	PULMONARY	4	DISEASES AND DISORDERS OF THE RESPIRATORY SYSTEM	X	X	X	X	X
191	CHRONIC OBSTRUCTIVE PULMONARY DISEASE W CC	PULMONARY	4	DISEASES AND DISORDERS OF THE RESPIRATORY SYSTEM	X	X	X	X	X
192	CHRONIC OBSTRUCTIVE PULMONARY DISEASE W/O CC/MCC	PULMONARY	4	DISEASES AND DISORDERS OF THE RESPIRATORY SYSTEM	X	X	X	X	X
193	SIMPLE PNEUMONIA & PLEURISY W MCC	PULMONARY	4	DISEASES AND DISORDERS OF THE RESPIRATORY SYSTEM	X	X	X	X	X
194	SIMPLE PNEUMONIA & PLEURISY W CC	PULMONARY	4	DISEASES AND DISORDERS OF THE RESPIRATORY SYSTEM	X	X	X	X	X
195	SIMPLE PNEUMONIA & PLEURISY W/O CC/MCC	PULMONARY	4	DISEASES AND DISORDERS OF THE RESPIRATORY SYSTEM	X	X	X	X	X
196	INTERSTITIAL LUNG DISEASE W MCC	PULMONARY	4	DISEASES AND DISORDERS OF THE RESPIRATORY SYSTEM	X	X	X	X	X
197	INTERSTITIAL LUNG DISEASE W CC	PULMONARY	4	DISEASES AND DISORDERS OF THE RESPIRATORY SYSTEM	X	X	X	X	X
198	INTERSTITIAL LUNG DISEASE W/O CC/MCC	PULMONARY	4	DISEASES AND DISORDERS OF THE RESPIRATORY SYSTEM	X	X	X	X	X
199	PNEUMOTHORAX W MCC	PULMONARY	4	DISEASES AND DISORDERS OF THE RESPIRATORY SYSTEM	X	X	X	X	X
200	PNEUMOTHORAX W CC	PULMONARY	4	DISEASES AND DISORDERS OF THE RESPIRATORY SYSTEM	X	X	X	X	X
201	PNEUMOTHORAX W/O CC/MCC	PULMONARY	4	DISEASES AND DISORDERS OF THE RESPIRATORY SYSTEM	X	X	X	X	X
202	BRONCHITIS & ASTHMA W CC/MCC	PULMONARY	4	DISEASES AND DISORDERS OF THE RESPIRATORY SYSTEM	X	X	X	X	X
203	BRONCHITIS & ASTHMA W/O CC/MCC	PULMONARY	4	DISEASES AND DISORDERS OF THE RESPIRATORY SYSTEM	X	X	X	X	X
204	RESPIRATORY SIGNS & SYMPTOMS	PULMONARY	4	DISEASES AND DISORDERS OF THE RESPIRATORY SYSTEM	X	X	X	X	X
205	OTHER RESPIRATORY SYSTEM DIAGNOSES W MCC	PULMONARY	4	DISEASES AND DISORDERS OF THE RESPIRATORY SYSTEM	X	X	X	X	X
206	OTHER RESPIRATORY SYSTEM DIAGNOSES W/O MCC	PULMONARY	4	DISEASES AND DISORDERS OF THE RESPIRATORY SYSTEM	X	X	X	X	X
207	RESPIRATORY SYSTEM DIAGNOSIS W VENTILATOR SUPPORT 96+ HOURS	PULMONARY	4	DISEASES AND DISORDERS OF THE RESPIRATORY SYSTEM	X	X	X	X	X
208	RESPIRATORY SYSTEM DIAGNOSIS W VENTILATOR SUPPORT <96 HOURS	PULMONARY	4	DISEASES AND DISORDERS OF THE RESPIRATORY SYSTEM	X	X	X	X	X
215	OTHER HEART ASSIST SYSTEM IMPLANT	CARDIOLOGY	5	DISEASES AND DISORDERS OF THE CIRCULATORY SYSTEM	X	X	X	X	X
216	CARDIAC VALVE & OTH MAJ CARDIOTHORACIC PROC W CARD CATH W MCC	OPEN HEART	5	DISEASES AND DISORDERS OF THE CIRCULATORY SYSTEM	X	X	X	X	X
217	CARDIAC VALVE & OTH MAJ CARDIOTHORACIC PROC W CARD CATH W CC	OPEN HEART	5	DISEASES AND DISORDERS OF THE CIRCULATORY SYSTEM	X	X	X	X	X
218	CARDIAC VALVE & OTH MAJ CARDIOTHORACIC PROC W CARD CATH W/O CC/MCC	OPEN HEART	5	DISEASES AND DISORDERS OF THE CIRCULATORY SYSTEM	X	X	X	X	X
219	CARDIAC VALVE & OTH MAJ CARDIOTHORACIC PROC W/O CARD CATH W MCC	OPEN HEART	5	DISEASES AND DISORDERS OF THE CIRCULATORY SYSTEM	X	X	X	X	X
220	CARDIAC VALVE & OTH MAJ CARDIOTHORACIC PROC W/O CARD CATH W CC	OPEN HEART	5	DISEASES AND DISORDERS OF THE CIRCULATORY SYSTEM	X	X	X	X	X
221	CARDIAC VALVE & OTH MAJ CARDIOTHORACIC PROC W/O CARD CATH W/O CC/MCC	OPEN HEART	5	DISEASES AND DISORDERS OF THE CIRCULATORY SYSTEM	X	X	X	X	X
222	CARDIAC DEFIB IMPLANT W CARDIAC CATH W AMI/HF/SHOCK W MCC	CARDIOLOGY	5	DISEASES AND DISORDERS OF THE CIRCULATORY SYSTEM	X	X	X	X	X
223	CARDIAC DEFIB IMPLANT W CARDIAC CATH W AMI/HF/SHOCK W/O MCC	CARDIOLOGY	5	DISEASES AND DISORDERS OF THE CIRCULATORY SYSTEM	X	X	X	X	X
224	CARDIAC DEFIB IMPLANT W CARDIAC CATH W/O AMI/HF/SHOCK W MCC	CARDIOLOGY	5	DISEASES AND DISORDERS OF THE CIRCULATORY SYSTEM	X	X	X	X	X
225	CARDIAC DEFIB IMPLANT W CARDIAC CATH W/O AMI/HF/SHOCK W/O MCC	CARDIOLOGY	5	DISEASES AND DISORDERS OF THE CIRCULATORY SYSTEM	X	X	X	X	X
226	CARDIAC DEFIBRILLATOR IMPLANT W/O CARDIAC CATH W MCC	CARDIOLOGY	5	DISEASES AND DISORDERS OF THE CIRCULATORY SYSTEM	X	X	X	X	X
227	CARDIAC DEFIBRILLATOR IMPLANT W/O CARDIAC CATH W/O MCC	CARDIOLOGY	5	DISEASES AND DISORDERS OF THE CIRCULATORY SYSTEM	X	X	X	X	X
228	OTHER CARDIOTHORACIC PROCEDURES W MCC	OPEN HEART	5	DISEASES AND DISORDERS OF THE CIRCULATORY SYSTEM	X	X	X	X	X
229	OTHER CARDIOTHORACIC PROCEDURES W CC	OPEN HEART	5	DISEASES AND DISORDERS OF THE CIRCULATORY SYSTEM	X	X	X	X	X
230	OTHER CARDIOTHORACIC PROCEDURES W/O CC/MCC	OPEN HEART	5	DISEASES AND DISORDERS OF THE CIRCULATORY SYSTEM	X	X	X	X	X
231	CORONARY BYPASS W PTCA W MCC	OPEN HEART	5	DISEASES AND DISORDERS OF THE CIRCULATORY SYSTEM	X	X	X	X	X
232	CORONARY BYPASS W PTCA W/O MCC	OPEN HEART	5	DISEASES AND DISORDERS OF THE CIRCULATORY SYSTEM	X	X	X	X	X
233	CORONARY BYPASS W CARDIAC CATH W MCC	OPEN HEART	5	DISEASES AND DISORDERS OF THE CIRCULATORY SYSTEM	X	X	X	X	X
234	CORONARY BYPASS W CARDIAC CATH W/O MCC	OPEN HEART	5	DISEASES AND DISORDERS OF THE CIRCULATORY SYSTEM	X	X	X	X	X
235	CORONARY BYPASS W/O CARDIAC CATH W MCC	OPEN HEART	5	DISEASES AND DISORDERS OF THE CIRCULATORY SYSTEM	X	X	X	X	X
236	CORONARY BYPASS W/O CARDIAC CATH W/O MCC	OPEN HEART	5	DISEASES AND DISORDERS OF THE CIRCULATORY SYSTEM	X	X	X	X	X
237	MAJOR CARDIOVASC PROCEDURES W MCC OR THORACIC AORTIC ANEURYSM REPAIR	CARDIOLOGY	5	DISEASES AND DISORDERS OF THE CIRCULATORY SYSTEM	X	X	X	X	X
238	MAJOR CARDIOVASC PROCEDURES W/O MCC	CARDIOLOGY	5	DISEASES AND DISORDERS OF THE CIRCULATORY SYSTEM	X	X	X	X	X
239	AMPUTATION FOR CIRC SYS DISORDERS EXC UPPER LIMB & TOE W MCC	VASCULAR SURGERY	5	DISEASES AND DISORDERS OF THE CIRCULATORY SYSTEM	X	X	X	X	X
240	AMPUTATION FOR CIRC SYS DISORDERS EXC UPPER LIMB & TOE W CC	VASCULAR SURGERY	5	DISEASES AND DISORDERS OF THE CIRCULATORY SYSTEM	X	X	X	X	X
241	AMPUTATION FOR CIRC SYS DISORDERS EXC UPPER LIMB & TOE W/O CC/MCC	VASCULAR SURGERY	5	DISEASES AND DISORDERS OF THE CIRCULATORY SYSTEM	X	X	X	X	X
242	PERMANENT CARDIAC PACEMAKER IMPLANT W MCC	CARDIOLOGY	5	DISEASES AND DISORDERS OF THE CIRCULATORY SYSTEM	X	X	X	X	X
243	PERMANENT CARDIAC PACEMAKER IMPLANT W CC	CARDIOLOGY	5	DISEASES AND DISORDERS OF THE CIRCULATORY SYSTEM	X	X	X	X	X
244	PERMANENT CARDIAC PACEMAKER IMPLANT W/O CC/MCC	CARDIOLOGY	5	DISEASES AND DISORDERS OF THE CIRCULATORY SYSTEM	X	X	X	X	X
245	AICD GENERATOR PROCEDURES	CARDIOLOGY	5	DISEASES AND DISORDERS OF THE CIRCULATORY SYSTEM	X	X	X	X	X
246	PERC CARDIOVASC PROC W DRUG-ELUTING STENT W MCC OR 4+ VESSELS/STENTS	CARDIOLOGY	5	DISEASES AND DISORDERS OF THE CIRCULATORY SYSTEM	X	X	X	X	X
247	PERC CARDIOVASC PROC W DRUG-ELUTING STENT W/O MCC	CARDIOLOGY	5	DISEASES AND DISORDERS OF THE CIRCULATORY SYSTEM	X	X	X	X	X
248	PERC CARDIOVASC PROC W NON-DRUG-ELUTING STENT W MCC OR 4+ VES/STENTS	CARDIOLOGY	5	DISEASES AND DISORDERS OF THE CIRCULATORY SYSTEM	X	X	X	X	X
249	PERC CARDIOVASC PROC W NON-DRUG-ELUTING STENT W/O MCC	CARDIOLOGY	5	DISEASES AND DISORDERS OF THE CIRCULATORY SYSTEM	X	X	X	X	X
250	PERC CARDIOVASC PROC W/O CORONARY ARTERY STENT W MCC	CARDIOLOGY	5	DISEASES AND DISORDERS OF THE CIRCULATORY SYSTEM	X	X	X	X	X
251	PERC CARDIOVASC PROC W/O CORONARY ARTERY STENT W/O MCC	CARDIOLOGY	5	DISEASES AND DISORDERS OF THE CIRCULATORY SYSTEM	X	X	X	X	X
252	OTHER VASCULAR PROCEDURES W MCC	VASCULAR SURGERY	5	DISEASES AND DISORDERS OF THE CIRCULATORY SYSTEM	X	X	X	X	X
253	OTHER VASCULAR PROCEDURES W CC	VASCULAR SURGERY	5	DISEASES AND DISORDERS OF THE CIRCULATORY SYSTEM	X	X	X	X	X
254	OTHER VASCULAR PROCEDURES W/O CC/MCC	VASCULAR SURGERY	5	DISEASES AND DISORDERS OF THE CIRCULATORY SYSTEM	X	X	X	X	X
255	UPPER LIMB & TOE AMPUTATION FOR CIRC SYSTEM DISORDERS W MCC	VASCULAR SURGERY	5	DISEASES AND DISORDERS OF THE CIRCULATORY SYSTEM	X	X	X	X	X
256	UPPER LIMB & TOE AMPUTATION FOR CIRC SYSTEM DISORDERS W CC	VASCULAR SURGERY	5	DISEASES AND DISORDERS OF THE CIRCULATORY SYSTEM	X	X	X	X	X
257	UPPER LIMB & TOE AMPUTATION FOR CIRC SYSTEM DISORDERS W/O CC/MCC	VASCULAR SURGERY	5	DISEASES AND DISORDERS OF THE CIRCULATORY SYSTEM	X	X	X	X	X
258	CARDIAC PACEMAKER DEVICE REPLACEMENT W MCC	CARDIOLOGY	5	DISEASES AND DISORDERS OF THE CIRCULATORY SYSTEM	X	X	X	X	X
259	CARDIAC PACEMAKER DEVICE REPLACEMENT W/O MCC	CARDIOLOGY	5	DISEASES AND DISORDERS OF THE CIRCULATORY SYSTEM	X	X	X	X	X
260	CARDIAC PACEMAKER REVISION EXCEPT DEVICE REPLACEMENT W MCC	CARDIOLOGY	5	DISEASES AND DISORDERS OF THE CIRCULATORY SYSTEM	X	X	X	X	X
261	CARDIAC PACEMAKER REVISION EXCEPT DEVICE REPLACEMENT W CC	CARDIOLOGY	5	DISEASES AND DISORDERS OF THE CIRCULATORY SYSTEM	X	X	X	X	X
262	CARDIAC PACEMAKER REVISION EXCEPT DEVICE REPLACEMENT W/O CC/MCC	CARDIOLOGY	5	DISEASES AND DISORDERS OF THE CIRCULATORY SYSTEM	X	X	X	X	X
263	VEIN LIGATION & STRIPPING	VASCULAR SURGERY	5	DISEASES AND DISORDERS OF THE CIRCULATORY SYSTEM	X	X	X	X	X
264	OTHER CIRCULATORY SYSTEM O.R. PROCEDURES	VASCULAR SURGERY	5	DISEASES AND DISORDERS OF THE CIRCULATORY SYSTEM	X	X	X	X	X
265	AICD LEAD PROCEDURES	CARDIOLOGY	5	DISEASES AND DISORDERS OF THE CIRCULATORY SYSTEM		X	X	X	X
280	ACUTE MYOCARDIAL INFARCTION, DISCHARGED ALIVE W MCC	CARDIOLOGY	5	DISEASES AND DISORDERS OF THE CIRCULATORY SYSTEM	X	X	X	X	X
281	ACUTE MYOCARDIAL INFARCTION, DISCHARGED ALIVE W CC	CARDIOLOGY	5	DISEASES AND DISORDERS OF THE CIRCULATORY SYSTEM	X	X	X	X	X
282	ACUTE MYOCARDIAL INFARCTION, DISCHARGED ALIVE W/O CC/MCC	CARDIOLOGY	5	DISEASES AND DISORDERS OF THE CIRCULATORY SYSTEM	X	X	X	X	X
283	ACUTE MYOCARDIAL INFARCTION, EXPIRED W MCC	CARDIOLOGY	5	DISEASES AND DISORDERS OF THE CIRCULATORY SYSTEM	X	X	X	X	X
284	ACUTE MYOCARDIAL INFARCTION, EXPIRED W CC	CARDIOLOGY	5	DISEASES AND DISORDERS OF THE CIRCULATORY SYSTEM	X	X	X	X	X
285	ACUTE MYOCARDIAL INFARCTION, EXPIRED W/O CC/MCC	CARDIOLOGY	5	DISEASES AND DISORDERS OF THE CIRCULATORY SYSTEM	X	X	X	X	X
286	CIRCULATORY DISORDERS EXCEPT AMI, W CARD CATH W MCC	CARDIOLOGY	5	DISEASES AND DISORDERS OF THE CIRCULATORY SYSTEM	X	X	X	X	X
287	CIRCULATORY DISORDERS EXCEPT AMI, W CARD CATH W/O MCC	CARDIOLOGY	5	DISEASES AND DISORDERS OF THE CIRCULATORY SYSTEM	X	X	X	X	X
288	ACUTE & SUBACUTE ENDOCARDITIS W MCC	CARDIOLOGY	5	DISEASES AND DISORDERS OF THE CIRCULATORY SYSTEM	X	X	X	X	X
289	ACUTE & SUBACUTE ENDOCARDITIS W CC	CARDIOLOGY	5	DISEASES AND DISORDERS OF THE CIRCULATORY SYSTEM	X	X	X	X	X
290	ACUTE & SUBACUTE ENDOCARDITIS W/O CC/MCC	CARDIOLOGY	5	DISEASES AND DISORDERS OF THE CIRCULATORY SYSTEM	X	X	X	X	X
291	HEART FAILURE & SHOCK W MCC	CARDIOLOGY	5	DISEASES AND DISORDERS OF THE CIRCULATORY SYSTEM	X	X	X	X	X
292	HEART FAILURE & SHOCK W CC	CARDIOLOGY	5	DISEASES AND DISORDERS OF THE CIRCULATORY SYSTEM	X	X	X	X	X
293	HEART FAILURE & SHOCK W/O CC/MCC	CARDIOLOGY	5	DISEASES AND DISORDERS OF THE CIRCULATORY SYSTEM	X	X	X	X	X
294	DEEP VEIN THROMBOPHLEBITIS W CC/MCC	CARDIOLOGY	5	DISEASES AND DISORDERS OF THE CIRCULATORY SYSTEM	X	X	X	X	X
295	DEEP VEIN THROMBOPHLEBITIS W/O CC/MCC	CARDIOLOGY	5	DISEASES AND DISORDERS OF THE CIRCULATORY SYSTEM	X	X	X	X	X
296	CARDIAC ARREST, UNEXPLAINED W MCC	CARDIOLOGY	5	DISEASES AND DISORDERS OF THE CIRCULATORY SYSTEM	X	X	X	X	X
297	CARDIAC ARREST, UNEXPLAINED W CC	CARDIOLOGY	5	DISEASES AND DISORDERS OF THE CIRCULATORY SYSTEM	X	X	X	X	X
298	CARDIAC ARREST, UNEXPLAINED W/O CC/MCC	CARDIOLOGY	5	DISEASES AND DISORDERS OF THE CIRCULATORY SYSTEM	X	X	X	X	X
299	PERIPHERAL VASCULAR DISORDERS W MCC	CARDIOLOGY	5	DISEASES AND DISORDERS OF THE CIRCULATORY SYSTEM	X	X	X	X	X
300	PERIPHERAL VASCULAR DISORDERS W CC	CARDIOLOGY	5	DISEASES AND DISORDERS OF THE CIRCULATORY SYSTEM	X	X	X	X	X
301	PERIPHERAL VASCULAR DISORDERS W/O CC/MCC	CARDIOLOGY	5	DISEASES AND DISORDERS OF THE CIRCULATORY SYSTEM	X	X	X	X	X
302	ATHEROSCLEROSIS W MCC	CARDIOLOGY	5	DISEASES AND DISORDERS OF THE CIRCULATORY SYSTEM	X	X	X	X	X
303	ATHEROSCLEROSIS W/O MCC	CARDIOLOGY	5	DISEASES AND DISORDERS OF THE CIRCULATORY SYSTEM	X	X	X	X	X
304	HYPERTENSION W MCC	CARDIOLOGY	5	DISEASES AND DISORDERS OF THE CIRCULATORY SYSTEM	X	X	X	X	X
305	HYPERTENSION W/O MCC	CARDIOLOGY	5	DISEASES AND DISORDERS OF THE CIRCULATORY SYSTEM	X	X	X	X	X
306	CARDIAC CONGENITAL & VALVULAR DISORDERS W MCC	CARDIOLOGY	5	DISEASES AND DISORDERS OF THE CIRCULATORY SYSTEM	X	X	X	X	X
307	CARDIAC CONGENITAL & VALVULAR DISORDERS W/O MCC	CARDIOLOGY	5	DISEASES AND DISORDERS OF THE CIRCULATORY SYSTEM	X	X	X	X	X
308	CARDIAC ARRHYTHMIA & CONDUCTION DISORDERS W MCC	CARDIOLOGY	5	DISEASES AND DISORDERS OF THE CIRCULATORY SYSTEM	X	X	X	X	X
309	CARDIAC ARRHYTHMIA & CONDUCTION DISORDERS W CC	CARDIOLOGY	5	DISEASES AND DISORDERS OF THE CIRCULATORY SYSTEM	X	X	X	X	X
310	CARDIAC ARRHYTHMIA & CONDUCTION DISORDERS W/O CC/MCC	CARDIOLOGY	5	DISEASES AND DISORDERS OF THE CIRCULATORY SYSTEM	X	X	X	X	X
311	ANGINA PECTORIS	CARDIOLOGY	5	DISEASES AND DISORDERS OF THE CIRCULATORY SYSTEM	X	X	X	X	X
312	SYNCOPE & COLLAPSE	CARDIOLOGY	5	DISEASES AND DISORDERS OF THE CIRCULATORY SYSTEM	X	X	X	X	X
313	CHEST PAIN	CARDIOLOGY	5	DISEASES AND DISORDERS OF THE CIRCULATORY SYSTEM	X	X	X	X	X
314	OTHER CIRCULATORY SYSTEM DIAGNOSES W MCC	CARDIOLOGY	5	DISEASES AND DISORDERS OF THE CIRCULATORY SYSTEM	X	X	X	X	X
315	OTHER CIRCULATORY SYSTEM DIAGNOSES W CC	CARDIOLOGY	5	DISEASES AND DISORDERS OF THE CIRCULATORY SYSTEM	X	X	X	X	X
316	OTHER CIRCULATORY SYSTEM DIAGNOSES W/O CC/MCC	CARDIOLOGY	5	DISEASES AND DISORDERS OF THE CIRCULATORY SYSTEM	X	X	X	X	X
326	STOMACH, ESOPHAGEAL & DUODENAL PROC W MCC	GENERAL SURGERY			X	X	X	X	X
327	STOMACH, ESOPHAGEAL & DUODENAL PROC W CC	GENERAL SURGERY			X	X	X	X	X
328	STOMACH, ESOPHAGEAL & DUODENAL PROC W/O CC/MCC	GENERAL SURGERY			X	X	X	X	X
329	MAJOR SMALL & LARGE BOWEL PROCEDURES W MCC	GENERAL SURGERY			X	X	X	X	X
330	MAJOR SMALL & LARGE BOWEL PROCEDURES W CC	GENERAL SURGERY			X	X	X	X	X
331	MAJOR SMALL & LARGE BOWEL PROCEDURES W/O CC/MCC	GENERAL SURGERY			X	X	X	X	X
332	RECTAL RESECTION W MCC	GENERAL SURGERY			X	X	X	X	X
333	RECTAL RESECTION W CC	GENERAL SURGERY			X	X	X	X	X
334	RECTAL RESECTION W/O CC/MCC	GENERAL SURGERY			X	X	X	X	X
335	PERITONEAL ADHESIOLYSIS W MCC	GENERAL SURGERY			X	X	X	X	X
336	PERITONEAL ADHESIOLYSIS W CC	GENERAL SURGERY			X	X	X	X	X
337	PERITONEAL ADHESIOLYSIS W/O CC/MCC	GENERAL SURGERY			X	X	X	X	X
338	APPENDECTOMY W COMPLICATED PRINCIPAL DIAG W MCC	GENERAL SURGERY			X	X	X	X	X
339	APPENDECTOMY W COMPLICATED PRINCIPAL DIAG W CC	GENERAL SURGERY			X	X	X	X	X
340	APPENDECTOMY W COMPLICATED PRINCIPAL DIAG W/O CC/MCC	GENERAL SURGERY			X	X	X	X	X
341	APPENDECTOMY W/O COMPLICATED PRINCIPAL DIAG W MCC	GENERAL SURGERY			X	X	X	X	X
342	APPENDECTOMY W/O COMPLICATED PRINCIPAL DIAG W CC	GENERAL SURGERY			X	X	X	X	X
343	APPENDECTOMY W/O COMPLICATED PRINCIPAL DIAG W/O CC/MCC	GENERAL SURGERY			X	X	X	X	X
344	MINOR SMALL & LARGE BOWEL PROCEDURES W MCC	GENERAL SURGERY			X	X	X	X	X
345	MINOR SMALL & LARGE BOWEL PROCEDURES W CC	GENERAL SURGERY			X	X	X	X	X
346	MINOR SMALL & LARGE BOWEL PROCEDURES W/O CC/MCC	GENERAL SURGERY			X	X	X	X	X
347	ANAL & STOMAL PROCEDURES W MCC	GENERAL SURGERY			X	X	X	X	X
348	ANAL & STOMAL PROCEDURES W CC	GENERAL SURGERY			X	X	X	X	X
349	ANAL & STOMAL PROCEDURES W/O CC/MCC	GENERAL SURGERY			X	X	X	X	X
350	INGUINAL & FEMORAL HERNIA PROCEDURES W MCC	GENERAL SURGERY			X	X	X	X	X
351	INGUINAL & FEMORAL HERNIA PROCEDURES W CC	GENERAL SURGERY			X	X	X	X	X
352	INGUINAL & FEMORAL HERNIA PROCEDURES W/O CC/MCC	GENERAL SURGERY			X	X	X	X	X
353	HERNIA PROCEDURES EXCEPT INGUINAL & FEMORAL W MCC	GENERAL SURGERY			X	X	X	X	X
354	HERNIA PROCEDURES EXCEPT INGUINAL & FEMORAL W CC	GENERAL SURGERY			X	X	X	X	X
355	HERNIA PROCEDURES EXCEPT INGUINAL & FEMORAL W/O CC/MCC	GENERAL SURGERY			X	X	X	X	X
356	OTHER DIGESTIVE SYSTEM O.R. PROCEDURES W MCC	GENERAL SURGERY			X	X	X	X	X
357	OTHER DIGESTIVE SYSTEM O.R. PROCEDURES W CC	GENERAL SURGERY			X	X	X	X	X
358	OTHER DIGESTIVE SYSTEM O.R. PROCEDURES W/O CC/MCC	GENERAL SURGERY			X	X	X	X	X
368	MAJOR ESOPHAGEAL DISORDERS W MCC	GASTROENTEROLOGY	6	DISEASES AND DISORDERS OF THE DIGESTIVE SYSTEM	X	X	X	X	X
369	MAJOR ESOPHAGEAL DISORDERS W CC	GASTROENTEROLOGY	6	DISEASES AND DISORDERS OF THE DIGESTIVE SYSTEM	X	X	X	X	X
370	MAJOR ESOPHAGEAL DISORDERS W/O CC/MCC	GASTROENTEROLOGY	6	DISEASES AND DISORDERS OF THE DIGESTIVE SYSTEM	X	X	X	X	X
371	MAJOR GASTROINTESTINAL DISORDERS & PERITONEAL INFECTIONS W MCC	GASTROENTEROLOGY	6	DISEASES AND DISORDERS OF THE DIGESTIVE SYSTEM	X	X	X	X	X
372	MAJOR GASTROINTESTINAL DISORDERS & PERITONEAL INFECTIONS W CC	GASTROENTEROLOGY	6	DISEASES AND DISORDERS OF THE DIGESTIVE SYSTEM	X	X	X	X	X
373	MAJOR GASTROINTESTINAL DISORDERS & PERITONEAL INFECTIONS W/O CC/MCC	GASTROENTEROLOGY	6	DISEASES AND DISORDERS OF THE DIGESTIVE SYSTEM	X	X	X	X	X
374	DIGESTIVE MALIGNANCY W MCC	ONCOLOGY MEDICAL	6	DISEASES AND DISORDERS OF THE DIGESTIVE SYSTEM	X	X	X	X	X
375	DIGESTIVE MALIGNANCY W CC	ONCOLOGY MEDICAL	6	DISEASES AND DISORDERS OF THE DIGESTIVE SYSTEM	X	X	X	X	X
376	DIGESTIVE MALIGNANCY W/O CC/MCC	ONCOLOGY MEDICAL	6	DISEASES AND DISORDERS OF THE DIGESTIVE SYSTEM	X	X	X	X	X
377	G.I. HEMORRHAGE W MCC	GASTROENTEROLOGY	6	DISEASES AND DISORDERS OF THE DIGESTIVE SYSTEM	X	X	X	X	X
378	G.I. HEMORRHAGE W CC	GASTROENTEROLOGY	6	DISEASES AND DISORDERS OF THE DIGESTIVE SYSTEM	X	X	X	X	X
379	G.I. HEMORRHAGE W/O CC/MCC	GASTROENTEROLOGY	6	DISEASES AND DISORDERS OF THE DIGESTIVE SYSTEM	X	X	X	X	X
380	COMPLICATED PEPTIC ULCER W MCC	GASTROENTEROLOGY	6	DISEASES AND DISORDERS OF THE DIGESTIVE SYSTEM	X	X	X	X	X
381	COMPLICATED PEPTIC ULCER W CC	GASTROENTEROLOGY	6	DISEASES AND DISORDERS OF THE DIGESTIVE SYSTEM	X	X	X	X	X
382	COMPLICATED PEPTIC ULCER W/O CC/MCC	GASTROENTEROLOGY	6	DISEASES AND DISORDERS OF THE DIGESTIVE SYSTEM	X	X	X	X	X
383	UNCOMPLICATED PEPTIC ULCER W MCC	GASTROENTEROLOGY	6	DISEASES AND DISORDERS OF THE DIGESTIVE SYSTEM	X	X	X	X	X
384	UNCOMPLICATED PEPTIC ULCER W/O MCC	GASTROENTEROLOGY	6	DISEASES AND DISORDERS OF THE DIGESTIVE SYSTEM	X	X	X	X	X
385	INFLAMMATORY BOWEL DISEASE W MCC	GASTROENTEROLOGY	6	DISEASES AND DISORDERS OF THE DIGESTIVE SYSTEM	X	X	X	X	X
386	INFLAMMATORY BOWEL DISEASE W CC	GASTROENTEROLOGY	6	DISEASES AND DISORDERS OF THE DIGESTIVE SYSTEM	X	X	X	X	X
387	INFLAMMATORY BOWEL DISEASE W/O CC/MCC	GASTROENTEROLOGY	6	DISEASES AND DISORDERS OF THE DIGESTIVE SYSTEM	X	X	X	X	X
388	G.I. OBSTRUCTION W MCC	GASTROENTEROLOGY	6	DISEASES AND DISORDERS OF THE DIGESTIVE SYSTEM	X	X	X	X	X
389	G.I. OBSTRUCTION W CC	GASTROENTEROLOGY	6	DISEASES AND DISORDERS OF THE DIGESTIVE SYSTEM	X	X	X	X	X
390	G.I. OBSTRUCTION W/O CC/MCC	GASTROENTEROLOGY	6	DISEASES AND DISORDERS OF THE DIGESTIVE SYSTEM	X	X	X	X	X
391	ESOPHAGITIS, GASTROENT & MISC DIGEST DISORDERS W MCC	GASTROENTEROLOGY	6	DISEASES AND DISORDERS OF THE DIGESTIVE SYSTEM	X	X	X	X	X
392	ESOPHAGITIS, GASTROENT & MISC DIGEST DISORDERS W/O MCC	GASTROENTEROLOGY	6	DISEASES AND DISORDERS OF THE DIGESTIVE SYSTEM	X	X	X	X	X
393	OTHER DIGESTIVE SYSTEM DIAGNOSES W MCC	GASTROENTEROLOGY	6	DISEASES AND DISORDERS OF THE DIGESTIVE SYSTEM	X	X	X	X	X
394	OTHER DIGESTIVE SYSTEM DIAGNOSES W CC	GASTROENTEROLOGY	6	DISEASES AND DISORDERS OF THE DIGESTIVE SYSTEM	X	X	X	X	X
395	OTHER DIGESTIVE SYSTEM DIAGNOSES W/O CC/MCC	GASTROENTEROLOGY	6	DISEASES AND DISORDERS OF THE DIGESTIVE SYSTEM	X	X	X	X	X
405	PANCREAS, LIVER & SHUNT PROCEDURES W MCC	GENERAL SURGERY			X	X	X	X	X
406	PANCREAS, LIVER & SHUNT PROCEDURES W CC	GENERAL SURGERY			X	X	X	X	X
407	PANCREAS, LIVER & SHUNT PROCEDURES W/O CC/MCC	GENERAL SURGERY			X	X	X	X	X
408	BILIARY TRACT PROC EXCEPT ONLY CHOLECYST W OR W/O C.D.E. W MCC	GENERAL SURGERY			X	X	X	X	X
409	BILIARY TRACT PROC EXCEPT ONLY CHOLECYST W OR W/O C.D.E. W CC	GENERAL SURGERY			X	X	X	X	X
410	BILIARY TRACT PROC EXCEPT ONLY CHOLECYST W OR W/O C.D.E. W/O CC/MCC	GENERAL SURGERY			X	X	X	X	X
411	CHOLECYSTECTOMY W C.D.E. W MCC	GENERAL SURGERY			X	X	X	X	X
412	CHOLECYSTECTOMY W C.D.E. W CC	GENERAL SURGERY			X	X	X	X	X
413	CHOLECYSTECTOMY W C.D.E. W/O CC/MCC	GENERAL SURGERY			X	X	X	X	X
414	CHOLECYSTECTOMY EXCEPT BY LAPAROSCOPE W/O C.D.E. W MCC	GENERAL SURGERY			X	X	X	X	X
415	CHOLECYSTECTOMY EXCEPT BY LAPAROSCOPE W/O C.D.E. W CC	GENERAL SURGERY			X	X	X	X	X
416	CHOLECYSTECTOMY EXCEPT BY LAPAROSCOPE W/O C.D.E. W/O CC/MCC	GENERAL SURGERY			X	X	X	X	X
417	LAPAROSCOPIC CHOLECYSTECTOMY W/O C.D.E. W MCC	GENERAL SURGERY			X	X	X	X	X
418	LAPAROSCOPIC CHOLECYSTECTOMY W/O C.D.E. W CC	GENERAL SURGERY			X	X	X	X	X
419	LAPAROSCOPIC CHOLECYSTECTOMY W/O C.D.E. W/O CC/MCC	GENERAL SURGERY			X	X	X	X	X
420	HEPATOBILIARY DIAGNOSTIC PROCEDURES W MCC	GENERAL SURGERY			X	X	X	X	X
421	HEPATOBILIARY DIAGNOSTIC PROCEDURES W CC	GENERAL SURGERY			X	X	X	X	X
422	HEPATOBILIARY DIAGNOSTIC PROCEDURES W/O CC/MCC	GENERAL SURGERY			X	X	X	X	X
423	OTHER HEPATOBILIARY OR PANCREAS O.R. PROCEDURES W MCC	GENERAL SURGERY			X	X	X	X	X
424	OTHER HEPATOBILIARY OR PANCREAS O.R. PROCEDURES W CC	GENERAL SURGERY			X	X	X	X	X
425	OTHER HEPATOBILIARY OR PANCREAS O.R. PROCEDURES W/O CC/MCC	GENERAL SURGERY			X	X	X	X	X
432	CIRRHOSIS & ALCOHOLIC HEPATITIS W MCC	GASTROENTEROLOGY	7	DISEASES AND DISORDERS OF THE HEPATOBILIARY SYSTEM AND PANCREAS	X	X	X	X	X
433	CIRRHOSIS & ALCOHOLIC HEPATITIS W CC	GASTROENTEROLOGY	7	DISEASES AND DISORDERS OF THE HEPATOBILIARY SYSTEM AND PANCREAS	X	X	X	X	X
434	CIRRHOSIS & ALCOHOLIC HEPATITIS W/O CC/MCC	GASTROENTEROLOGY	7	DISEASES AND DISORDERS OF THE HEPATOBILIARY SYSTEM AND PANCREAS	X	X	X	X	X
435	MALIGNANCY OF HEPATOBILIARY SYSTEM OR PANCREAS W MCC	ONCOLOGY MEDICAL	7	DISEASES AND DISORDERS OF THE HEPATOBILIARY SYSTEM AND PANCREAS	X	X	X	X	X
436	MALIGNANCY OF HEPATOBILIARY SYSTEM OR PANCREAS W CC	ONCOLOGY MEDICAL	7	DISEASES AND DISORDERS OF THE HEPATOBILIARY SYSTEM AND PANCREAS	X	X	X	X	X
437	MALIGNANCY OF HEPATOBILIARY SYSTEM OR PANCREAS W/O CC/MCC	ONCOLOGY MEDICAL	7	DISEASES AND DISORDERS OF THE HEPATOBILIARY SYSTEM AND PANCREAS	X	X	X	X	X
438	DISORDERS OF PANCREAS EXCEPT MALIGNANCY W MCC	GASTROENTEROLOGY	7	DISEASES AND DISORDERS OF THE HEPATOBILIARY SYSTEM AND PANCREAS	X	X	X	X	X
439	DISORDERS OF PANCREAS EXCEPT MALIGNANCY W CC	GASTROENTEROLOGY	7	DISEASES AND DISORDERS OF THE HEPATOBILIARY SYSTEM AND PANCREAS	X	X	X	X	X
440	DISORDERS OF PANCREAS EXCEPT MALIGNANCY W/O CC/MCC	GASTROENTEROLOGY	7	DISEASES AND DISORDERS OF THE HEPATOBILIARY SYSTEM AND PANCREAS	X	X	X	X	X
441	DISORDERS OF LIVER EXCEPT MALIG,CIRR,ALC HEPA W MCC	GASTROENTEROLOGY	7	DISEASES AND DISORDERS OF THE HEPATOBILIARY SYSTEM AND PANCREAS	X	X	X	X	X
442	DISORDERS OF LIVER EXCEPT MALIG,CIRR,ALC HEPA W CC	GASTROENTEROLOGY	7	DISEASES AND DISORDERS OF THE HEPATOBILIARY SYSTEM AND PANCREAS	X	X	X	X	X
443	DISORDERS OF LIVER EXCEPT MALIG,CIRR,ALC HEPA W/O CC/MCC	GASTROENTEROLOGY	7	DISEASES AND DISORDERS OF THE HEPATOBILIARY SYSTEM AND PANCREAS	X	X	X	X	X
444	DISORDERS OF THE BILIARY TRACT W MCC	GASTROENTEROLOGY	7	DISEASES AND DISORDERS OF THE HEPATOBILIARY SYSTEM AND PANCREAS	X	X	X	X	X
445	DISORDERS OF THE BILIARY TRACT W CC	GASTROENTEROLOGY	7	DISEASES AND DISORDERS OF THE HEPATOBILIARY SYSTEM AND PANCREAS	X	X	X	X	X
446	DISORDERS OF THE BILIARY TRACT W/O CC/MCC	GASTROENTEROLOGY	7	DISEASES AND DISORDERS OF THE HEPATOBILIARY SYSTEM AND PANCREAS	X	X	X	X	X
453	COMBINED ANTERIOR/POSTERIOR SPINAL FUSION W MCC	ORTHOPEDICS	8	DISEASES AND DISORDERS OF THE MUSCULOSKELETAL SYSTEM	X	X	X	X	X
454	COMBINED ANTERIOR/POSTERIOR SPINAL FUSION W CC	ORTHOPEDICS	8	DISEASES AND DISORDERS OF THE MUSCULOSKELETAL SYSTEM	X	X	X	X	X
455	COMBINED ANTERIOR/POSTERIOR SPINAL FUSION W/O CC/MCC	ORTHOPEDICS	8	DISEASES AND DISORDERS OF THE MUSCULOSKELETAL SYSTEM	X	X	X	X	X
456	SPINAL FUS EXC CERV W SPINAL CURV/MALIG/INFEC OR 9+ FUS W MCC	ORTHOPEDICS	8	DISEASES AND DISORDERS OF THE MUSCULOSKELETAL SYSTEM	X	X	X	X	X
457	SPINAL FUS EXC CERV W SPINAL CURV/MALIG/INFEC OR 9+ FUS W CC	ORTHOPEDICS	8	DISEASES AND DISORDERS OF THE MUSCULOSKELETAL SYSTEM	X	X	X	X	X
458	SPINAL FUS EXC CERV W SPINAL CURV/MALIG/INFEC OR 9+ FUS W/O CC/MCC	ORTHOPEDICS	8	DISEASES AND DISORDERS OF THE MUSCULOSKELETAL SYSTEM	X	X	X	X	X
459	SPINAL FUSION EXCEPT CERVICAL W MCC	ORTHOPEDICS	8	DISEASES AND DISORDERS OF THE MUSCULOSKELETAL SYSTEM	X	X	X	X	X
460	SPINAL FUSION EXCEPT CERVICAL W/O MCC	ORTHOPEDICS	8	DISEASES AND DISORDERS OF THE MUSCULOSKELETAL SYSTEM	X	X	X	X	X
461	BILATERAL OR MULTIPLE MAJOR JOINT PROCS OF LOWER EXTREMITY W MCC	ORTHOPEDICS	8	DISEASES AND DISORDERS OF THE MUSCULOSKELETAL SYSTEM	X	X	X	X	X
462	BILATERAL OR MULTIPLE MAJOR JOINT PROCS OF LOWER EXTREMITY W/O MCC	ORTHOPEDICS	8	DISEASES AND DISORDERS OF THE MUSCULOSKELETAL SYSTEM	X	X	X	X	X
463	WND DEBRID & SKN GRFT EXC HAND, FOR MUSCULO-CONN TISS DIS W MCC	ORTHOPEDICS	8	DISEASES AND DISORDERS OF THE MUSCULOSKELETAL SYSTEM	X	X	X	X	X
464	WND DEBRID & SKN GRFT EXC HAND, FOR MUSCULO-CONN TISS DIS W CC	ORTHOPEDICS	8	DISEASES AND DISORDERS OF THE MUSCULOSKELETAL SYSTEM	X	X	X	X	X
465	WND DEBRID & SKN GRFT EXC HAND, FOR MUSCULO-CONN TISS DIS W/O CC/MCC	ORTHOPEDICS	8	DISEASES AND DISORDERS OF THE MUSCULOSKELETAL SYSTEM	X	X	X	X	X
466	REVISION OF HIP OR KNEE REPLACEMENT W MCC	ORTHOPEDICS	8	DISEASES AND DISORDERS OF THE MUSCULOSKELETAL SYSTEM	X	X	X	X	X
467	REVISION OF HIP OR KNEE REPLACEMENT W CC	ORTHOPEDICS	8	DISEASES AND DISORDERS OF THE MUSCULOSKELETAL SYSTEM	X	X	X	X	X
468	REVISION OF HIP OR KNEE REPLACEMENT W/O CC/MCC	ORTHOPEDICS	8	DISEASES AND DISORDERS OF THE MUSCULOSKELETAL SYSTEM	X	X	X	X	X
469	MAJOR JOINT REPLACEMENT OR REATTACHMENT OF LOWER EXTREMITY W MCC	ORTHOPEDICS	8	DISEASES AND DISORDERS OF THE MUSCULOSKELETAL SYSTEM	X	X	X	X	X
470	MAJOR JOINT REPLACEMENT OR REATTACHMENT OF LOWER EXTREMITY W/O MCC	ORTHOPEDICS	8	DISEASES AND DISORDERS OF THE MUSCULOSKELETAL SYSTEM	X	X	X	X	X
471	CERVICAL SPINAL FUSION W MCC	ORTHOPEDICS	8	DISEASES AND DISORDERS OF THE MUSCULOSKELETAL SYSTEM	X	X	X	X	X
472	CERVICAL SPINAL FUSION W CC	ORTHOPEDICS	8	DISEASES AND DISORDERS OF THE MUSCULOSKELETAL SYSTEM	X	X	X	X	X
473	CERVICAL SPINAL FUSION W/O CC/MCC	ORTHOPEDICS	8	DISEASES AND DISORDERS OF THE MUSCULOSKELETAL SYSTEM	X	X	X	X	X
474	AMPUTATION FOR MUSCULOSKELETAL SYS & CONN TISSUE DIS W MCC	ORTHOPEDICS	8	DISEASES AND DISORDERS OF THE MUSCULOSKELETAL SYSTEM	X	X	X	X	X
475	AMPUTATION FOR MUSCULOSKELETAL SYS & CONN TISSUE DIS W CC	ORTHOPEDICS	8	DISEASES AND DISORDERS OF THE MUSCULOSKELETAL SYSTEM	X	X	X	X	X
476	AMPUTATION FOR MUSCULOSKELETAL SYS & CONN TISSUE DIS W/O CC/MCC	ORTHOPEDICS	8	DISEASES AND DISORDERS OF THE MUSCULOSKELETAL SYSTEM	X	X	X	X	X
477	BIOPSIES OF MUSCULOSKELETAL SYSTEM & CONNECTIVE TISSUE W MCC	ORTHOPEDICS	8	DISEASES AND DISORDERS OF THE MUSCULOSKELETAL SYSTEM	X	X	X	X	X
478	BIOPSIES OF MUSCULOSKELETAL SYSTEM & CONNECTIVE TISSUE W CC	ORTHOPEDICS	8	DISEASES AND DISORDERS OF THE MUSCULOSKELETAL SYSTEM	X	X	X	X	X
479	BIOPSIES OF MUSCULOSKELETAL SYSTEM & CONNECTIVE TISSUE W/O CC/MCC	ORTHOPEDICS	8	DISEASES AND DISORDERS OF THE MUSCULOSKELETAL SYSTEM	X	X	X	X	X
480	HIP & FEMUR PROCEDURES EXCEPT MAJOR JOINT W MCC	ORTHOPEDICS	8	DISEASES AND DISORDERS OF THE MUSCULOSKELETAL SYSTEM	X	X	X	X	X
481	HIP & FEMUR PROCEDURES EXCEPT MAJOR JOINT W CC	ORTHOPEDICS	8	DISEASES AND DISORDERS OF THE MUSCULOSKELETAL SYSTEM	X	X	X	X	X
482	HIP & FEMUR PROCEDURES EXCEPT MAJOR JOINT W/O CC/MCC	ORTHOPEDICS	8	DISEASES AND DISORDERS OF THE MUSCULOSKELETAL SYSTEM	X	X	X	X	X
483	MAJOR JOINT & LIMB REATTACHMENT PROC OF UPPER EXTREMITY W CC/MCC	ORTHOPEDICS	8	DISEASES AND DISORDERS OF THE MUSCULOSKELETAL SYSTEM	X	X	X	X	X
484	MAJOR JOINT & LIMB REATTACHMENT PROC OF UPPER EXTREMITY W/O CC/MCC	ORTHOPEDICS	8	DISEASES AND DISORDERS OF THE MUSCULOSKELETAL SYSTEM	X	X	X	X	X
485	KNEE PROCEDURES W PDX OF INFECTION W MCC	ORTHOPEDICS	8	DISEASES AND DISORDERS OF THE MUSCULOSKELETAL SYSTEM	X	X	X	X	X
486	KNEE PROCEDURES W PDX OF INFECTION W CC	ORTHOPEDICS	8	DISEASES AND DISORDERS OF THE MUSCULOSKELETAL SYSTEM	X	X	X	X	X
487	KNEE PROCEDURES W PDX OF INFECTION W/O CC/MCC	ORTHOPEDICS	8	DISEASES AND DISORDERS OF THE MUSCULOSKELETAL SYSTEM	X	X	X	X	X
488	KNEE PROCEDURES W/O PDX OF INFECTION W CC/MCC	ORTHOPEDICS	8	DISEASES AND DISORDERS OF THE MUSCULOSKELETAL SYSTEM	X	X	X	X	X
489	KNEE PROCEDURES W/O PDX OF INFECTION W/O CC/MCC	ORTHOPEDICS	8	DISEASES AND DISORDERS OF THE MUSCULOSKELETAL SYSTEM	X	X	X	X	X
490	BACK & NECK PROC EXC SPINAL FUSION W CC/MCC OR DISC DEVICE/NEUROSTIM	ORTHOPEDICS	8	DISEASES AND DISORDERS OF THE MUSCULOSKELETAL SYSTEM	X	X	X	X	X
491	BACK & NECK PROC EXC SPINAL FUSION W/O CC/MCC	ORTHOPEDICS	8	DISEASES AND DISORDERS OF THE MUSCULOSKELETAL SYSTEM	X	X	X	X	X
492	LOWER EXTREM & HUMER PROC EXCEPT HIP,FOOT,FEMUR W MCC	ORTHOPEDICS	8	DISEASES AND DISORDERS OF THE MUSCULOSKELETAL SYSTEM	X	X	X	X	X
493	LOWER EXTREM & HUMER PROC EXCEPT HIP,FOOT,FEMUR W CC	ORTHOPEDICS	8	DISEASES AND DISORDERS OF THE MUSCULOSKELETAL SYSTEM	X	X	X	X	X
494	LOWER EXTREM & HUMER PROC EXCEPT HIP,FOOT,FEMUR W/O CC/MCC	ORTHOPEDICS	8	DISEASES AND DISORDERS OF THE MUSCULOSKELETAL SYSTEM	X	X	X	X	X
495	LOCAL EXCISION & REMOVAL INT FIX DEVICES EXC HIP & FEMUR W MCC	ORTHOPEDICS	8	DISEASES AND DISORDERS OF THE MUSCULOSKELETAL SYSTEM	X	X	X	X	X
496	LOCAL EXCISION & REMOVAL INT FIX DEVICES EXC HIP & FEMUR W CC	ORTHOPEDICS	8	DISEASES AND DISORDERS OF THE MUSCULOSKELETAL SYSTEM	X	X	X	X	X
497	LOCAL EXCISION & REMOVAL INT FIX DEVICES EXC HIP & FEMUR W/O CC/MCC	ORTHOPEDICS	8	DISEASES AND DISORDERS OF THE MUSCULOSKELETAL SYSTEM	X	X	X	X	X
498	LOCAL EXCISION & REMOVAL INT FIX DEVICES OF HIP & FEMUR W CC/MCC	ORTHOPEDICS	8	DISEASES AND DISORDERS OF THE MUSCULOSKELETAL SYSTEM	X	X	X	X	X
499	LOCAL EXCISION & REMOVAL INT FIX DEVICES OF HIP & FEMUR W/O CC/MCC	ORTHOPEDICS	8	DISEASES AND DISORDERS OF THE MUSCULOSKELETAL SYSTEM	X	X	X	X	X
500	SOFT TISSUE PROCEDURES W MCC	ORTHOPEDICS	8	DISEASES AND DISORDERS OF THE MUSCULOSKELETAL SYSTEM	X	X	X	X	X
501	SOFT TISSUE PROCEDURES W CC	ORTHOPEDICS	8	DISEASES AND DISORDERS OF THE MUSCULOSKELETAL SYSTEM	X	X	X	X	X
502	SOFT TISSUE PROCEDURES W/O CC/MCC	ORTHOPEDICS	8	DISEASES AND DISORDERS OF THE MUSCULOSKELETAL SYSTEM	X	X	X	X	X
503	FOOT PROCEDURES W MCC	ORTHOPEDICS	8	DISEASES AND DISORDERS OF THE MUSCULOSKELETAL SYSTEM	X	X	X	X	X
504	FOOT PROCEDURES W CC	ORTHOPEDICS	8	DISEASES AND DISORDERS OF THE MUSCULOSKELETAL SYSTEM	X	X	X	X	X
505	FOOT PROCEDURES W/O CC/MCC	ORTHOPEDICS	8	DISEASES AND DISORDERS OF THE MUSCULOSKELETAL SYSTEM	X	X	X	X	X
506	MAJOR THUMB OR JOINT PROCEDURES	ORTHOPEDICS	8	DISEASES AND DISORDERS OF THE MUSCULOSKELETAL SYSTEM	X	X	X	X	X
507	MAJOR SHOULDER OR ELBOW JOINT PROCEDURES W CC/MCC	ORTHOPEDICS	8	DISEASES AND DISORDERS OF THE MUSCULOSKELETAL SYSTEM	X	X	X	X	X
508	MAJOR SHOULDER OR ELBOW JOINT PROCEDURES W/O CC/MCC	ORTHOPEDICS	8	DISEASES AND DISORDERS OF THE MUSCULOSKELETAL SYSTEM	X	X	X	X	X
509	ARTHROSCOPY	ORTHOPEDICS	8	DISEASES AND DISORDERS OF THE MUSCULOSKELETAL SYSTEM	X	X	X	X	X
510	SHOULDER,ELBOW OR FOREARM PROC,EXC MAJOR JOINT PROC W MCC	ORTHOPEDICS	8	DISEASES AND DISORDERS OF THE MUSCULOSKELETAL SYSTEM	X	X	X	X	X
511	SHOULDER,ELBOW OR FOREARM PROC,EXC MAJOR JOINT PROC W CC	ORTHOPEDICS	8	DISEASES AND DISORDERS OF THE MUSCULOSKELETAL SYSTEM	X	X	X	X	X
512	SHOULDER,ELBOW OR FOREARM PROC,EXC MAJOR JOINT PROC W/O CC/MCC	ORTHOPEDICS	8	DISEASES AND DISORDERS OF THE MUSCULOSKELETAL SYSTEM	X	X	X	X	X
513	HAND OR WRIST PROC, EXCEPT MAJOR THUMB OR JOINT PROC W CC/MCC	ORTHOPEDICS	8	DISEASES AND DISORDERS OF THE MUSCULOSKELETAL SYSTEM	X	X	X	X	X
514	HAND OR WRIST PROC, EXCEPT MAJOR THUMB OR JOINT PROC W/O CC/MCC	ORTHOPEDICS	8	DISEASES AND DISORDERS OF THE MUSCULOSKELETAL SYSTEM	X	X	X	X	X
515	OTHER MUSCULOSKELET SYS & CONN TISS O.R. PROC W MCC	ORTHOPEDICS	8	DISEASES AND DISORDERS OF THE MUSCULOSKELETAL SYSTEM	X	X	X	X	X
516	OTHER MUSCULOSKELET SYS & CONN TISS O.R. PROC W CC	ORTHOPEDICS	8	DISEASES AND DISORDERS OF THE MUSCULOSKELETAL SYSTEM	X	X	X	X	X
517	OTHER MUSCULOSKELET SYS & CONN TISS O.R. PROC W/O CC/MCC	ORTHOPEDICS	8	DISEASES AND DISORDERS OF THE MUSCULOSKELETAL SYSTEM	X	X	X	X	X
533	FRACTURES OF FEMUR W MCC	ORTHOPEDICS	8	DISEASES AND DISORDERS OF THE MUSCULOSKELETAL SYSTEM	X	X	X	X	X
534	FRACTURES OF FEMUR W/O MCC	ORTHOPEDICS	8	DISEASES AND DISORDERS OF THE MUSCULOSKELETAL SYSTEM	X	X	X	X	X
535	FRACTURES OF HIP & PELVIS W MCC	ORTHOPEDICS	8	DISEASES AND DISORDERS OF THE MUSCULOSKELETAL SYSTEM	X	X	X	X	X
536	FRACTURES OF HIP & PELVIS W/O MCC	ORTHOPEDICS	8	DISEASES AND DISORDERS OF THE MUSCULOSKELETAL SYSTEM	X	X	X	X	X
537	SPRAINS, STRAINS, & DISLOCATIONS OF HIP, PELVIS & THIGH W CC/MCC	ORTHOPEDICS	8	DISEASES AND DISORDERS OF THE MUSCULOSKELETAL SYSTEM	X	X	X	X	X
538	SPRAINS, STRAINS, & DISLOCATIONS OF HIP, PELVIS & THIGH W/O CC/MCC	ORTHOPEDICS	8	DISEASES AND DISORDERS OF THE MUSCULOSKELETAL SYSTEM	X	X	X	X	X
539	OSTEOMYELITIS W MCC	ORTHOPEDICS	8	DISEASES AND DISORDERS OF THE MUSCULOSKELETAL SYSTEM	X	X	X	X	X
540	OSTEOMYELITIS W CC	ORTHOPEDICS	8	DISEASES AND DISORDERS OF THE MUSCULOSKELETAL SYSTEM	X	X	X	X	X
541	OSTEOMYELITIS W/O CC/MCC	ORTHOPEDICS	8	DISEASES AND DISORDERS OF THE MUSCULOSKELETAL SYSTEM	X	X	X	X	X
542	PATHOLOGICAL FRACTURES & MUSCULOSKELET & CONN TISS MALIG W MCC	ONCOLOGY MEDICAL	8	DISEASES AND DISORDERS OF THE MUSCULOSKELETAL SYSTEM	X	X	X	X	X
543	PATHOLOGICAL FRACTURES & MUSCULOSKELET & CONN TISS MALIG W CC	ONCOLOGY MEDICAL	8	DISEASES AND DISORDERS OF THE MUSCULOSKELETAL SYSTEM	X	X	X	X	X
544	PATHOLOGICAL FRACTURES & MUSCULOSKELET & CONN TISS MALIG W/O CC/MCC	ONCOLOGY MEDICAL	8	DISEASES AND DISORDERS OF THE MUSCULOSKELETAL SYSTEM	X	X	X	X	X
545	CONNECTIVE TISSUE DISORDERS W MCC	ORTHOPEDICS	8	DISEASES AND DISORDERS OF THE MUSCULOSKELETAL SYSTEM	X	X	X	X	X
546	CONNECTIVE TISSUE DISORDERS W CC	ORTHOPEDICS	8	DISEASES AND DISORDERS OF THE MUSCULOSKELETAL SYSTEM	X	X	X	X	X
547	CONNECTIVE TISSUE DISORDERS W/O CC/MCC	ORTHOPEDICS	8	DISEASES AND DISORDERS OF THE MUSCULOSKELETAL SYSTEM	X	X	X	X	X
548	SEPTIC ARTHRITIS W MCC	RHEUMATOLOGY	8	DISEASES AND DISORDERS OF THE MUSCULOSKELETAL SYSTEM	X	X	X	X	X
549	SEPTIC ARTHRITIS W CC	RHEUMATOLOGY	8	DISEASES AND DISORDERS OF THE MUSCULOSKELETAL SYSTEM	X	X	X	X	X
550	SEPTIC ARTHRITIS W/O CC/MCC	RHEUMATOLOGY	8	DISEASES AND DISORDERS OF THE MUSCULOSKELETAL SYSTEM	X	X	X	X	X
551	MEDICAL BACK PROBLEMS W MCC	ORTHOPEDICS	8	DISEASES AND DISORDERS OF THE MUSCULOSKELETAL SYSTEM	X	X	X	X	X
552	MEDICAL BACK PROBLEMS W/O MCC	ORTHOPEDICS	8	DISEASES AND DISORDERS OF THE MUSCULOSKELETAL SYSTEM	X	X	X	X	X
553	BONE DISEASES & ARTHROPATHIES W MCC	RHEUMATOLOGY	8	DISEASES AND DISORDERS OF THE MUSCULOSKELETAL SYSTEM	X	X	X	X	X
554	BONE DISEASES & ARTHROPATHIES W/O MCC	RHEUMATOLOGY	8	DISEASES AND DISORDERS OF THE MUSCULOSKELETAL SYSTEM	X	X	X	X	X
555	SIGNS & SYMPTOMS OF MUSCULOSKELETAL SYSTEM & CONN TISSUE W MCC	RHEUMATOLOGY	8	DISEASES AND DISORDERS OF THE MUSCULOSKELETAL SYSTEM	X	X	X	X	X
556	SIGNS & SYMPTOMS OF MUSCULOSKELETAL SYSTEM & CONN TISSUE W/O MCC	RHEUMATOLOGY	8	DISEASES AND DISORDERS OF THE MUSCULOSKELETAL SYSTEM	X	X	X	X	X
557	TENDONITIS, MYOSITIS & BURSITIS W MCC	ORTHOPEDICS	8	DISEASES AND DISORDERS OF THE MUSCULOSKELETAL SYSTEM	X	X	X	X	X
558	TENDONITIS, MYOSITIS & BURSITIS W/O MCC	ORTHOPEDICS	8	DISEASES AND DISORDERS OF THE MUSCULOSKELETAL SYSTEM	X	X	X	X	X
559	AFTERCARE, MUSCULOSKELETAL SYSTEM & CONNECTIVE TISSUE W MCC	ORTHOPEDICS	8	DISEASES AND DISORDERS OF THE MUSCULOSKELETAL SYSTEM	X	X	X	X	X
560	AFTERCARE, MUSCULOSKELETAL SYSTEM & CONNECTIVE TISSUE W CC	ORTHOPEDICS	8	DISEASES AND DISORDERS OF THE MUSCULOSKELETAL SYSTEM	X	X	X	X	X
561	AFTERCARE, MUSCULOSKELETAL SYSTEM & CONNECTIVE TISSUE W/O CC/MCC	ORTHOPEDICS	8	DISEASES AND DISORDERS OF THE MUSCULOSKELETAL SYSTEM	X	X	X	X	X
562	FX, SPRN, STRN & DISL EXCEPT FEMUR, HIP, PELVIS & THIGH W MCC	ORTHOPEDICS	8	DISEASES AND DISORDERS OF THE MUSCULOSKELETAL SYSTEM	X	X	X	X	X
563	FX, SPRN, STRN & DISL EXCEPT FEMUR, HIP, PELVIS & THIGH W/O MCC	ORTHOPEDICS	8	DISEASES AND DISORDERS OF THE MUSCULOSKELETAL SYSTEM	X	X	X	X	X
564	OTHER MUSCULOSKELETAL SYS & CONNECTIVE TISSUE DIAGNOSES W MCC	ORTHOPEDICS	8	DISEASES AND DISORDERS OF THE MUSCULOSKELETAL SYSTEM	X	X	X	X	X
565	OTHER MUSCULOSKELETAL SYS & CONNECTIVE TISSUE DIAGNOSES W CC	ORTHOPEDICS	8	DISEASES AND DISORDERS OF THE MUSCULOSKELETAL SYSTEM	X	X	X	X	X
566	OTHER MUSCULOSKELETAL SYS & CONNECTIVE TISSUE DIAGNOSES W/O CC/MCC	ORTHOPEDICS	8	DISEASES AND DISORDERS OF THE MUSCULOSKELETAL SYSTEM	X	X	X	X	X
570	SKIN DEBRIDEMENT W MCC	GENERAL SURGERY							X
571	SKIN DEBRIDEMENT W CC	GENERAL SURGERY							X
572	SKIN DEBRIDEMENT W/O CC/MCC	GENERAL SURGERY							X
573	SKIN GRAFT FOR SKIN ULCER OR CELLULITIS W MCC	GENERAL SURGERY			X	X	X	X	X
574	SKIN GRAFT FOR SKIN ULCER OR CELLULITIS W CC	GENERAL SURGERY			X	X	X	X	X
575	SKIN GRAFT FOR SKIN ULCER OR CELLULITIS W/O CC/MCC	GENERAL SURGERY			X	X	X	X	X
576	SKIN GRAFT EXC FOR SKIN ULCER OR CELLULITIS W MCC	GENERAL SURGERY			X	X	X	X	X
577	SKIN GRAFT EXC FOR SKIN ULCER OR CELLULITIS W CC	GENERAL SURGERY			X	X	X	X	X
578	SKIN GRAFT EXC FOR SKIN ULCER OR CELLULITIS W/O CC/MCC	GENERAL SURGERY			X	X	X	X	X
579	OTHER SKIN, SUBCUT TISS & BREAST PROC W MCC	GENERAL SURGERY			X	X	X	X	X
580	OTHER SKIN, SUBCUT TISS & BREAST PROC W CC	GENERAL SURGERY			X	X	X	X	X
581	OTHER SKIN, SUBCUT TISS & BREAST PROC W/O CC/MCC	GENERAL SURGERY			X	X	X	X	X
582	MASTECTOMY FOR MALIGNANCY W CC/MCC	GENERAL SURGERY			X	X	X	X	X
583	MASTECTOMY FOR MALIGNANCY W/O CC/MCC	GENERAL SURGERY			X	X	X	X	X
584	BREAST BIOPSY, LOCAL EXCISION & OTHER BREAST PROCEDURES W CC/MCC	GENERAL SURGERY			X	X	X	X	X
585	BREAST BIOPSY, LOCAL EXCISION & OTHER BREAST PROCEDURES W/O CC/MCC	GENERAL SURGERY			X	X	X	X	X
592	SKIN ULCERS W MCC	DERMATOLOGY	9	DISEASES AND DISORDERS OF THE SKIN, SUBCUTANEOUS TISSUE AND BREAST	X	X	X	X	X
593	SKIN ULCERS W CC	DERMATOLOGY	9	DISEASES AND DISORDERS OF THE SKIN, SUBCUTANEOUS TISSUE AND BREAST	X	X	X	X	X
594	SKIN ULCERS W/O CC/MCC	DERMATOLOGY	9	DISEASES AND DISORDERS OF THE SKIN, SUBCUTANEOUS TISSUE AND BREAST	X	X	X	X	X
595	MAJOR SKIN DISORDERS W MCC	DERMATOLOGY	9	DISEASES AND DISORDERS OF THE SKIN, SUBCUTANEOUS TISSUE AND BREAST	X	X	X	X	X
596	MAJOR SKIN DISORDERS W/O MCC	DERMATOLOGY	9	DISEASES AND DISORDERS OF THE SKIN, SUBCUTANEOUS TISSUE AND BREAST	X	X	X	X	X
597	MALIGNANT BREAST DISORDERS W MCC	ONCOLOGY MEDICAL	9	DISEASES AND DISORDERS OF THE SKIN, SUBCUTANEOUS TISSUE AND BREAST	X	X	X	X	X
598	MALIGNANT BREAST DISORDERS W CC	ONCOLOGY MEDICAL	9	DISEASES AND DISORDERS OF THE SKIN, SUBCUTANEOUS TISSUE AND BREAST	X	X	X	X	X
599	MALIGNANT BREAST DISORDERS W/O CC/MCC	ONCOLOGY MEDICAL	9	DISEASES AND DISORDERS OF THE SKIN, SUBCUTANEOUS TISSUE AND BREAST	X	X	X	X	X
600	NON-MALIGNANT BREAST DISORDERS W CC/MCC	GENERAL MEDICINE	9	DISEASES AND DISORDERS OF THE SKIN, SUBCUTANEOUS TISSUE AND BREAST	X	X	X	X	X
601	NON-MALIGNANT BREAST DISORDERS W/O CC/MCC	GENERAL MEDICINE	9	DISEASES AND DISORDERS OF THE SKIN, SUBCUTANEOUS TISSUE AND BREAST	X	X	X	X	X
602	CELLULITIS W MCC	DERMATOLOGY	9	DISEASES AND DISORDERS OF THE SKIN, SUBCUTANEOUS TISSUE AND BREAST	X	X	X	X	X
603	CELLULITIS W/O MCC	DERMATOLOGY	9	DISEASES AND DISORDERS OF THE SKIN, SUBCUTANEOUS TISSUE AND BREAST	X	X	X	X	X
604	TRAUMA TO THE SKIN, SUBCUT TISS & BREAST W MCC	DERMATOLOGY	9	DISEASES AND DISORDERS OF THE SKIN, SUBCUTANEOUS TISSUE AND BREAST	X	X	X	X	X
605	TRAUMA TO THE SKIN, SUBCUT TISS & BREAST W/O MCC	DERMATOLOGY	9	DISEASES AND DISORDERS OF THE SKIN, SUBCUTANEOUS TISSUE AND BREAST	X	X	X	X	X
606	MINOR SKIN DISORDERS W MCC	DERMATOLOGY	9	DISEASES AND DISORDERS OF THE SKIN, SUBCUTANEOUS TISSUE AND BREAST	X	X	X	X	X
607	MINOR SKIN DISORDERS W/O MCC	DERMATOLOGY	9	DISEASES AND DISORDERS OF THE SKIN, SUBCUTANEOUS TISSUE AND BREAST	X	X	X	X	X
614	ADRENAL & PITUITARY PROCEDURES W CC/MCC	GENERAL SURGERY			X	X	X	X	X
615	ADRENAL & PITUITARY PROCEDURES W/O CC/MCC	GENERAL SURGERY			X	X	X	X	X
616	AMPUTAT OF LOWER LIMB FOR ENDOCRINE,NUTRIT,& METABOL DIS W MCC	GENERAL SURGERY			X	X	X	X	X
617	AMPUTAT OF LOWER LIMB FOR ENDOCRINE,NUTRIT,& METABOL DIS W CC	GENERAL SURGERY			X	X	X	X	X
618	AMPUTAT OF LOWER LIMB FOR ENDOCRINE,NUTRIT,& METABOL DIS W/O CC/MCC	GENERAL SURGERY			X	X	X	X	X
619	O.R. PROCEDURES FOR OBESITY W MCC	GENERAL SURGERY			X	X	X	X	X
620	O.R. PROCEDURES FOR OBESITY W CC	GENERAL SURGERY			X	X	X	X	X
621	O.R. PROCEDURES FOR OBESITY W/O CC/MCC	GENERAL SURGERY			X	X	X	X	X
622	SKIN GRAFTS & WOUND DEBRID FOR ENDOC, NUTRIT & METAB DIS W MCC	GENERAL SURGERY			X	X	X	X	X
623	SKIN GRAFTS & WOUND DEBRID FOR ENDOC, NUTRIT & METAB DIS W CC	GENERAL SURGERY			X	X	X	X	X
624	SKIN GRAFTS & WOUND DEBRID FOR ENDOC, NUTRIT & METAB DIS W/O CC/MCC	GENERAL SURGERY			X	X	X	X	X
625	THYROID, PARATHYROID & THYROGLOSSAL PROCEDURES W MCC	GENERAL SURGERY			X	X	X	X	X
626	THYROID, PARATHYROID & THYROGLOSSAL PROCEDURES W CC	GENERAL SURGERY			X	X	X	X	X
627	THYROID, PARATHYROID & THYROGLOSSAL PROCEDURES W/O CC/MCC	GENERAL SURGERY			X	X	X	X	X
628	OTHER ENDOCRINE, NUTRIT & METAB O.R. PROC W MCC	GENERAL SURGERY			X	X	X	X	X
629	OTHER ENDOCRINE, NUTRIT & METAB O.R. PROC W CC	GENERAL SURGERY			X	X	X	X	X
630	OTHER ENDOCRINE, NUTRIT & METAB O.R. PROC W/O CC/MCC	GENERAL SURGERY			X	X	X	X	X
637	DIABETES W MCC	ENDOCRINE	10	ENDOCRINE, NUTRITIONAL AND METABOLIC DISEASES AND DISORDERS	X	X	X	X	X
638	DIABETES W CC	ENDOCRINE	10	ENDOCRINE, NUTRITIONAL AND METABOLIC DISEASES AND DISORDERS	X	X	X	X	X
639	DIABETES W/O CC/MCC	ENDOCRINE	10	ENDOCRINE, NUTRITIONAL AND METABOLIC DISEASES AND DISORDERS	X	X	X	X	X
640	MISC DISORDERS OF NUTRITION,METABOLISM,FLUIDS/ELECTROLYTES W MCC	ENDOCRINE	10	ENDOCRINE, NUTRITIONAL AND METABOLIC DISEASES AND DISORDERS	X	X	X	X	X
641	MISC DISORDERS OF NUTRITION,METABOLISM,FLUIDS/ELECTROLYTES W/O MCC	ENDOCRINE	10	ENDOCRINE, NUTRITIONAL AND METABOLIC DISEASES AND DISORDERS	X	X	X	X	X
642	INBORN ERRORS OF METABOLISM	ENDOCRINE	10	ENDOCRINE, NUTRITIONAL AND METABOLIC DISEASES AND DISORDERS	X	X	X	X	X
643	ENDOCRINE DISORDERS W MCC	ENDOCRINE	10	ENDOCRINE, NUTRITIONAL AND METABOLIC DISEASES AND DISORDERS	X	X	X	X	X
644	ENDOCRINE DISORDERS W CC	ENDOCRINE	10	ENDOCRINE, NUTRITIONAL AND METABOLIC DISEASES AND DISORDERS	X	X	X	X	X
645	ENDOCRINE DISORDERS W/O CC/MCC	ENDOCRINE	10	ENDOCRINE, NUTRITIONAL AND METABOLIC DISEASES AND DISORDERS	X	X	X	X	X
652	KIDNEY TRANSPLANT	UROLOGY	11	DISEASES AND DISORDERS OF THE KIDNEY AND URINARY TRACT	X	X	X	X	X
653	MAJOR BLADDER PROCEDURES W MCC	UROLOGY	11	DISEASES AND DISORDERS OF THE KIDNEY AND URINARY TRACT	X	X	X	X	X
654	MAJOR BLADDER PROCEDURES W CC	UROLOGY	11	DISEASES AND DISORDERS OF THE KIDNEY AND URINARY TRACT	X	X	X	X	X
655	MAJOR BLADDER PROCEDURES W/O CC/MCC	UROLOGY	11	DISEASES AND DISORDERS OF THE KIDNEY AND URINARY TRACT	X	X	X	X	X
656	KIDNEY & URETER PROCEDURES FOR NEOPLASM W MCC	UROLOGY	11	DISEASES AND DISORDERS OF THE KIDNEY AND URINARY TRACT	X	X	X	X	X
657	KIDNEY & URETER PROCEDURES FOR NEOPLASM W CC	UROLOGY	11	DISEASES AND DISORDERS OF THE KIDNEY AND URINARY TRACT	X	X	X	X	X
658	KIDNEY & URETER PROCEDURES FOR NEOPLASM W/O CC/MCC	UROLOGY	11	DISEASES AND DISORDERS OF THE KIDNEY AND URINARY TRACT	X	X	X	X	X
659	KIDNEY & URETER PROCEDURES FOR NON-NEOPLASM W MCC	UROLOGY	11	DISEASES AND DISORDERS OF THE KIDNEY AND URINARY TRACT	X	X	X	X	X
660	KIDNEY & URETER PROCEDURES FOR NON-NEOPLASM W CC	UROLOGY	11	DISEASES AND DISORDERS OF THE KIDNEY AND URINARY TRACT	X	X	X	X	X
661	KIDNEY & URETER PROCEDURES FOR NON-NEOPLASM W/O CC/MCC	UROLOGY	11	DISEASES AND DISORDERS OF THE KIDNEY AND URINARY TRACT	X	X	X	X	X
662	MINOR BLADDER PROCEDURES W MCC	UROLOGY	11	DISEASES AND DISORDERS OF THE KIDNEY AND URINARY TRACT	X	X	X	X	X
663	MINOR BLADDER PROCEDURES W CC	UROLOGY	11	DISEASES AND DISORDERS OF THE KIDNEY AND URINARY TRACT	X	X	X	X	X
664	MINOR BLADDER PROCEDURES W/O CC/MCC	UROLOGY	11	DISEASES AND DISORDERS OF THE KIDNEY AND URINARY TRACT	X	X	X	X	X
665	PROSTATECTOMY W MCC	UROLOGY	11	DISEASES AND DISORDERS OF THE KIDNEY AND URINARY TRACT	X	X	X	X	X
666	PROSTATECTOMY W CC	UROLOGY	11	DISEASES AND DISORDERS OF THE KIDNEY AND URINARY TRACT	X	X	X	X	X
667	PROSTATECTOMY W/O CC/MCC	UROLOGY	11	DISEASES AND DISORDERS OF THE KIDNEY AND URINARY TRACT	X	X	X	X	X
668	TRANSURETHRAL PROCEDURES W MCC	UROLOGY	11	DISEASES AND DISORDERS OF THE KIDNEY AND URINARY TRACT	X	X	X	X	X
669	TRANSURETHRAL PROCEDURES W CC	UROLOGY	11	DISEASES AND DISORDERS OF THE KIDNEY AND URINARY TRACT	X	X	X	X	X
670	TRANSURETHRAL PROCEDURES W/O CC/MCC	UROLOGY	11	DISEASES AND DISORDERS OF THE KIDNEY AND URINARY TRACT	X	X	X	X	X
671	URETHRAL PROCEDURES W CC/MCC	UROLOGY	11	DISEASES AND DISORDERS OF THE KIDNEY AND URINARY TRACT	X	X	X	X	X
672	URETHRAL PROCEDURES W/O CC/MCC	UROLOGY	11	DISEASES AND DISORDERS OF THE KIDNEY AND URINARY TRACT	X	X	X	X	X
673	OTHER KIDNEY & URINARY TRACT PROCEDURES W MCC	UROLOGY	11	DISEASES AND DISORDERS OF THE KIDNEY AND URINARY TRACT	X	X	X	X	X
674	OTHER KIDNEY & URINARY TRACT PROCEDURES W CC	UROLOGY	11	DISEASES AND DISORDERS OF THE KIDNEY AND URINARY TRACT	X	X	X	X	X
675	OTHER KIDNEY & URINARY TRACT PROCEDURES W/O CC/MCC	UROLOGY	11	DISEASES AND DISORDERS OF THE KIDNEY AND URINARY TRACT	X	X	X	X	X
682	RENAL FAILURE W MCC	NEPHROLOGY	11	DISEASES AND DISORDERS OF THE KIDNEY AND URINARY TRACT	X	X	X	X	X
683	RENAL FAILURE W CC	NEPHROLOGY	11	DISEASES AND DISORDERS OF THE KIDNEY AND URINARY TRACT	X	X	X	X	X
684	RENAL FAILURE W/O CC/MCC	NEPHROLOGY	11	DISEASES AND DISORDERS OF THE KIDNEY AND URINARY TRACT	X	X	X	X	X
685	ADMIT FOR RENAL DIALYSIS	NEPHROLOGY	11	DISEASES AND DISORDERS OF THE KIDNEY AND URINARY TRACT	X	X	X	X	X
686	KIDNEY & URINARY TRACT NEOPLASMS W MCC	ONCOLOGY MEDICAL	11	DISEASES AND DISORDERS OF THE KIDNEY AND URINARY TRACT	X	X	X	X	X
687	KIDNEY & URINARY TRACT NEOPLASMS W CC	ONCOLOGY MEDICAL	11	DISEASES AND DISORDERS OF THE KIDNEY AND URINARY TRACT	X	X	X	X	X
688	KIDNEY & URINARY TRACT NEOPLASMS W/O CC/MCC	ONCOLOGY MEDICAL	11	DISEASES AND DISORDERS OF THE KIDNEY AND URINARY TRACT	X	X	X	X	X
689	KIDNEY & URINARY TRACT INFECTIONS W MCC	NEPHROLOGY	11	DISEASES AND DISORDERS OF THE KIDNEY AND URINARY TRACT	X	X	X	X	X
690	KIDNEY & URINARY TRACT INFECTIONS W/O MCC	NEPHROLOGY	11	DISEASES AND DISORDERS OF THE KIDNEY AND URINARY TRACT	X	X	X	X	X
691	URINARY STONES W ESW LITHOTRIPSY W CC/MCC	UROLOGY	11	DISEASES AND DISORDERS OF THE KIDNEY AND URINARY TRACT	X	X	X	X	X
692	URINARY STONES W ESW LITHOTRIPSY W/O CC/MCC	UROLOGY	11	DISEASES AND DISORDERS OF THE KIDNEY AND URINARY TRACT	X	X	X	X	X
693	URINARY STONES W/O ESW LITHOTRIPSY W MCC	UROLOGY	11	DISEASES AND DISORDERS OF THE KIDNEY AND URINARY TRACT	X	X	X	X	X
694	URINARY STONES W/O ESW LITHOTRIPSY W/O MCC	UROLOGY	11	DISEASES AND DISORDERS OF THE KIDNEY AND URINARY TRACT	X	X	X	X	X
695	KIDNEY & URINARY TRACT SIGNS & SYMPTOMS W MCC	NEPHROLOGY	11	DISEASES AND DISORDERS OF THE KIDNEY AND URINARY TRACT	X	X	X	X	X
696	KIDNEY & URINARY TRACT SIGNS & SYMPTOMS W/O MCC	NEPHROLOGY	11	DISEASES AND DISORDERS OF THE KIDNEY AND URINARY TRACT	X	X	X	X	X
697	URETHRAL STRICTURE	UROLOGY	11	DISEASES AND DISORDERS OF THE KIDNEY AND URINARY TRACT	X	X	X	X	X
698	OTHER KIDNEY & URINARY TRACT DIAGNOSES W MCC	NEPHROLOGY	11	DISEASES AND DISORDERS OF THE KIDNEY AND URINARY TRACT	X	X	X	X	X
699	OTHER KIDNEY & URINARY TRACT DIAGNOSES W CC	NEPHROLOGY	11	DISEASES AND DISORDERS OF THE KIDNEY AND URINARY TRACT	X	X	X	X	X
700	OTHER KIDNEY & URINARY TRACT DIAGNOSES W/O CC/MCC	NEPHROLOGY	11	DISEASES AND DISORDERS OF THE KIDNEY AND URINARY TRACT	X	X	X	X	X
707	MAJOR MALE PELVIC PROCEDURES W CC/MCC	UROLOGY	12	DISEASES AND DISORDERS OF THE MALE REPRODUCTIVE SYSTEM	X	X	X	X	X
708	MAJOR MALE PELVIC PROCEDURES W/O CC/MCC	UROLOGY	12	DISEASES AND DISORDERS OF THE MALE REPRODUCTIVE SYSTEM	X	X	X	X	X
709	PENIS PROCEDURES W CC/MCC	UROLOGY	12	DISEASES AND DISORDERS OF THE MALE REPRODUCTIVE SYSTEM	X	X	X	X	X
710	PENIS PROCEDURES W/O CC/MCC	UROLOGY	12	DISEASES AND DISORDERS OF THE MALE REPRODUCTIVE SYSTEM	X	X	X	X	X
711	TESTES PROCEDURES W CC/MCC	UROLOGY	12	DISEASES AND DISORDERS OF THE MALE REPRODUCTIVE SYSTEM	X	X	X	X	X
712	TESTES PROCEDURES W/O CC/MCC	UROLOGY	12	DISEASES AND DISORDERS OF THE MALE REPRODUCTIVE SYSTEM	X	X	X	X	X
713	TRANSURETHRAL PROSTATECTOMY W CC/MCC	UROLOGY	12	DISEASES AND DISORDERS OF THE MALE REPRODUCTIVE SYSTEM	X	X	X	X	X
714	TRANSURETHRAL PROSTATECTOMY W/O CC/MCC	UROLOGY	12	DISEASES AND DISORDERS OF THE MALE REPRODUCTIVE SYSTEM	X	X	X	X	X
715	OTHER MALE REPRODUCTIVE SYSTEM O.R. PROC FOR MALIGNANCY W CC/MCC	UROLOGY	12	DISEASES AND DISORDERS OF THE MALE REPRODUCTIVE SYSTEM	X	X	X	X	X
716	OTHER MALE REPRODUCTIVE SYSTEM O.R. PROC FOR MALIGNANCY W/O CC/MCC	UROLOGY	12	DISEASES AND DISORDERS OF THE MALE REPRODUCTIVE SYSTEM	X	X	X	X	X
717	OTHER MALE REPRODUCTIVE SYSTEM O.R. PROC EXC MALIGNANCY W CC/MCC	UROLOGY	12	DISEASES AND DISORDERS OF THE MALE REPRODUCTIVE SYSTEM	X	X	X	X	X
718	OTHER MALE REPRODUCTIVE SYSTEM O.R. PROC EXC MALIGNANCY W/O CC/MCC	UROLOGY	12	DISEASES AND DISORDERS OF THE MALE REPRODUCTIVE SYSTEM	X	X	X	X	X
722	MALIGNANCY, MALE REPRODUCTIVE SYSTEM W MCC	ONCOLOGY MEDICAL	12	DISEASES AND DISORDERS OF THE MALE REPRODUCTIVE SYSTEM	X	X	X	X	X
723	MALIGNANCY, MALE REPRODUCTIVE SYSTEM W CC	ONCOLOGY MEDICAL	12	DISEASES AND DISORDERS OF THE MALE REPRODUCTIVE SYSTEM	X	X	X	X	X
724	MALIGNANCY, MALE REPRODUCTIVE SYSTEM W/O CC/MCC	ONCOLOGY MEDICAL	12	DISEASES AND DISORDERS OF THE MALE REPRODUCTIVE SYSTEM	X	X	X	X	X
725	BENIGN PROSTATIC HYPERTROPHY W MCC	UROLOGY	12	DISEASES AND DISORDERS OF THE MALE REPRODUCTIVE SYSTEM	X	X	X	X	X
726	BENIGN PROSTATIC HYPERTROPHY W/O MCC	UROLOGY	12	DISEASES AND DISORDERS OF THE MALE REPRODUCTIVE SYSTEM	X	X	X	X	X
727	INFLAMMATION OF THE MALE REPRODUCTIVE SYSTEM W MCC	UROLOGY	12	DISEASES AND DISORDERS OF THE MALE REPRODUCTIVE SYSTEM	X	X	X	X	X
728	INFLAMMATION OF THE MALE REPRODUCTIVE SYSTEM W/O MCC	UROLOGY	12	DISEASES AND DISORDERS OF THE MALE REPRODUCTIVE SYSTEM	X	X	X	X	X
729	OTHER MALE REPRODUCTIVE SYSTEM DIAGNOSES W CC/MCC	UROLOGY	12	DISEASES AND DISORDERS OF THE MALE REPRODUCTIVE SYSTEM	X	X	X	X	X
730	OTHER MALE REPRODUCTIVE SYSTEM DIAGNOSES W/O CC/MCC	UROLOGY	12	DISEASES AND DISORDERS OF THE MALE REPRODUCTIVE SYSTEM	X	X	X	X	X
734	PELVIC EVISCERATION, RAD HYSTERECTOMY & RAD VULVECTOMY W CC/MCC	GYNECOLOGY	13	DISEASES AND DISORDERS OF THE FEMALE REPRODUCTIVE SYSTEM	X	X	X	X	X
735	PELVIC EVISCERATION, RAD HYSTERECTOMY & RAD VULVECTOMY W/O CC/MCC	GYNECOLOGY	13	DISEASES AND DISORDERS OF THE FEMALE REPRODUCTIVE SYSTEM	X	X	X	X	X
736	UTERINE & ADNEXA PROC FOR OVARIAN OR ADNEXAL MALIGNANCY W MCC	GYNECOLOGY	13	DISEASES AND DISORDERS OF THE FEMALE REPRODUCTIVE SYSTEM	X	X	X	X	X
737	UTERINE & ADNEXA PROC FOR OVARIAN OR ADNEXAL MALIGNANCY W CC	GYNECOLOGY	13	DISEASES AND DISORDERS OF THE FEMALE REPRODUCTIVE SYSTEM	X	X	X	X	X
738	UTERINE & ADNEXA PROC FOR OVARIAN OR ADNEXAL MALIGNANCY W/O CC/MCC	GYNECOLOGY	13	DISEASES AND DISORDERS OF THE FEMALE REPRODUCTIVE SYSTEM	X	X	X	X	X
739	UTERINE,ADNEXA PROC FOR NON-OVARIAN/ADNEXAL MALIG W MCC	GYNECOLOGY	13	DISEASES AND DISORDERS OF THE FEMALE REPRODUCTIVE SYSTEM	X	X	X	X	X
740	UTERINE,ADNEXA PROC FOR NON-OVARIAN/ADNEXAL MALIG W CC	GYNECOLOGY	13	DISEASES AND DISORDERS OF THE FEMALE REPRODUCTIVE SYSTEM	X	X	X	X	X
741	UTERINE,ADNEXA PROC FOR NON-OVARIAN/ADNEXAL MALIG W/O CC/MCC	GYNECOLOGY	13	DISEASES AND DISORDERS OF THE FEMALE REPRODUCTIVE SYSTEM	X	X	X	X	X
742	UTERINE & ADNEXA PROC FOR NON-MALIGNANCY W CC/MCC	GYNECOLOGY	13	DISEASES AND DISORDERS OF THE FEMALE REPRODUCTIVE SYSTEM	X	X	X	X	X
743	UTERINE & ADNEXA PROC FOR NON-MALIGNANCY W/O CC/MCC	GYNECOLOGY	13	DISEASES AND DISORDERS OF THE FEMALE REPRODUCTIVE SYSTEM	X	X	X	X	X
744	D&C, CONIZATION, LAPAROSCOPY & TUBAL INTERRUPTION W CC/MCC	GYNECOLOGY	13	DISEASES AND DISORDERS OF THE FEMALE REPRODUCTIVE SYSTEM	X	X	X	X	X
745	D&C, CONIZATION, LAPAROSCOPY & TUBAL INTERRUPTION W/O CC/MCC	GYNECOLOGY	13	DISEASES AND DISORDERS OF THE FEMALE REPRODUCTIVE SYSTEM	X	X	X	X	X
746	VAGINA, CERVIX & VULVA PROCEDURES W CC/MCC	GYNECOLOGY	13	DISEASES AND DISORDERS OF THE FEMALE REPRODUCTIVE SYSTEM	X	X	X	X	X
747	VAGINA, CERVIX & VULVA PROCEDURES W/O CC/MCC	GYNECOLOGY	13	DISEASES AND DISORDERS OF THE FEMALE REPRODUCTIVE SYSTEM	X	X	X	X	X
748	FEMALE REPRODUCTIVE SYSTEM RECONSTRUCTIVE PROCEDURES	GYNECOLOGY	13	DISEASES AND DISORDERS OF THE FEMALE REPRODUCTIVE SYSTEM	X	X	X	X	X
749	OTHER FEMALE REPRODUCTIVE SYSTEM O.R. PROCEDURES W CC/MCC	GYNECOLOGY	13	DISEASES AND DISORDERS OF THE FEMALE REPRODUCTIVE SYSTEM	X	X	X	X	X
750	OTHER FEMALE REPRODUCTIVE SYSTEM O.R. PROCEDURES W/O CC/MCC	GYNECOLOGY	13	DISEASES AND DISORDERS OF THE FEMALE REPRODUCTIVE SYSTEM	X	X	X	X	X
754	MALIGNANCY, FEMALE REPRODUCTIVE SYSTEM W MCC	ONCOLOGY MEDICAL	13	DISEASES AND DISORDERS OF THE FEMALE REPRODUCTIVE SYSTEM	X	X	X	X	X
755	MALIGNANCY, FEMALE REPRODUCTIVE SYSTEM W CC	ONCOLOGY MEDICAL	13	DISEASES AND DISORDERS OF THE FEMALE REPRODUCTIVE SYSTEM	X	X	X	X	X
756	MALIGNANCY, FEMALE REPRODUCTIVE SYSTEM W/O CC/MCC	ONCOLOGY MEDICAL	13	DISEASES AND DISORDERS OF THE FEMALE REPRODUCTIVE SYSTEM	X	X	X	X	X
757	INFECTIONS, FEMALE REPRODUCTIVE SYSTEM W MCC	GYNECOLOGY	13	DISEASES AND DISORDERS OF THE FEMALE REPRODUCTIVE SYSTEM	X	X	X	X	X
758	INFECTIONS, FEMALE REPRODUCTIVE SYSTEM W CC	GYNECOLOGY	13	DISEASES AND DISORDERS OF THE FEMALE REPRODUCTIVE SYSTEM	X	X	X	X	X
759	INFECTIONS, FEMALE REPRODUCTIVE SYSTEM W/O CC/MCC	GYNECOLOGY	13	DISEASES AND DISORDERS OF THE FEMALE REPRODUCTIVE SYSTEM	X	X	X	X	X
760	MENSTRUAL & OTHER FEMALE REPRODUCTIVE SYSTEM DISORDERS W CC/MCC	GYNECOLOGY	13	DISEASES AND DISORDERS OF THE FEMALE REPRODUCTIVE SYSTEM	X	X	X	X	X
761	MENSTRUAL & OTHER FEMALE REPRODUCTIVE SYSTEM DISORDERS W/O CC/MCC	GYNECOLOGY	13	DISEASES AND DISORDERS OF THE FEMALE REPRODUCTIVE SYSTEM	X	X	X	X	X
765	CESAREAN SECTION W CC/MCC	OB/DELIVERY	14	PREGNANCY, CHILDBIRTH AND THE PUERPERIUM	X	X	X	X	X
766	CESAREAN SECTION W/O CC/MCC	OB/DELIVERY	14	PREGNANCY, CHILDBIRTH AND THE PUERPERIUM	X	X	X	X	X
767	VAGINAL DELIVERY W STERILIZATION &/OR D&C	OB/DELIVERY	14	PREGNANCY, CHILDBIRTH AND THE PUERPERIUM	X	X	X	X	X
768	VAGINAL DELIVERY W O.R. PROC EXCEPT STERIL &/OR D&C	OB/DELIVERY	14	PREGNANCY, CHILDBIRTH AND THE PUERPERIUM	X	X	X	X	X
769	POSTPARTUM & POST ABORTION DIAGNOSES W O.R. PROCEDURE	OTHER OB	14	PREGNANCY, CHILDBIRTH AND THE PUERPERIUM	X	X	X	X	X
770	ABORTION W D&C, ASPIRATION CURETTAGE OR HYSTEROTOMY	OTHER OB	14	PREGNANCY, CHILDBIRTH AND THE PUERPERIUM	X	X	X	X	X
774	VAGINAL DELIVERY W COMPLICATING DIAGNOSES	OB/DELIVERY	14	PREGNANCY, CHILDBIRTH AND THE PUERPERIUM	X	X	X	X	X
775	VAGINAL DELIVERY W/O COMPLICATING DIAGNOSES	OB/DELIVERY	14	PREGNANCY, CHILDBIRTH AND THE PUERPERIUM	X	X	X	X	X
776	POSTPARTUM & POST ABORTION DIAGNOSES W/O O.R. PROCEDURE	OTHER OB	14	PREGNANCY, CHILDBIRTH AND THE PUERPERIUM	X	X	X	X	X
777	ECTOPIC PREGNANCY	OTHER OB	14	PREGNANCY, CHILDBIRTH AND THE PUERPERIUM	X	X	X	X	X
778	THREATENED ABORTION	OTHER OB	14	PREGNANCY, CHILDBIRTH AND THE PUERPERIUM	X	X	X	X	X
779	ABORTION W/O D&C	OTHER OB	14	PREGNANCY, CHILDBIRTH AND THE PUERPERIUM	X	X	X	X	X
780	FALSE LABOR	OTHER OB	14	PREGNANCY, CHILDBIRTH AND THE PUERPERIUM	X	X	X	X	X
781	OTHER ANTEPARTUM DIAGNOSES W MEDICAL COMPLICATIONS	OTHER OB	14	PREGNANCY, CHILDBIRTH AND THE PUERPERIUM	X	X	X	X	X
782	OTHER ANTEPARTUM DIAGNOSES W/O MEDICAL COMPLICATIONS	OTHER OB	14	PREGNANCY, CHILDBIRTH AND THE PUERPERIUM	X	X	X	X	X
789	NEONATES, DIED OR TRANSFERRED TO ANOTHER ACUTE CARE FACILITY	NEONATOLOGY	15	NEWBORNS AND OTHER NEONATES WITH CONDITIONS ORIGINATING IN THE PERINATAL	X	X	X	X	X
790	EXTREME IMMATURITY OR RESPIRATORY DISTRESS SYNDROME, NEONATE	NEONATOLOGY	15	NEWBORNS AND OTHER NEONATES WITH CONDITIONS ORIGINATING IN THE PERINATAL	X	X	X	X	X
791	PREMATURITY W MAJOR PROBLEMS	NEONATOLOGY	15	NEWBORNS AND OTHER NEONATES WITH CONDITIONS ORIGINATING IN THE PERINATAL	X	X	X	X	X
792	PREMATURITY W/O MAJOR PROBLEMS	NEONATOLOGY	15	NEWBORNS AND OTHER NEONATES WITH CONDITIONS ORIGINATING IN THE PERINATAL	X	X	X	X	X
793	FULL TERM NEONATE W MAJOR PROBLEMS	NEONATOLOGY	15	NEWBORNS AND OTHER NEONATES WITH CONDITIONS ORIGINATING IN THE PERINATAL	X	X	X	X	X
794	NEONATE W OTHER SIGNIFICANT PROBLEMS	NEONATOLOGY	15	NEWBORNS AND OTHER NEONATES WITH CONDITIONS ORIGINATING IN THE PERINATAL	X	X	X	X	X
795	NORMAL NEWBORN	NORMAL NEWBORNS	15	NEWBORNS AND OTHER NEONATES WITH CONDITIONS ORIGINATING IN THE PERINATAL	X	X	X	X	X
799	SPLENECTOMY W MCC	GENERAL SURGERY			X	X	X	X	X
800	SPLENECTOMY W CC	GENERAL SURGERY			X	X	X	X	X
801	SPLENECTOMY W/O CC/MCC	GENERAL SURGERY			X	X	X	X	X
802	OTHER O.R. PROC OF THE BLOOD & BLOOD FORMING ORGANS W MCC	GENERAL SURGERY			X	X	X	X	X
803	OTHER O.R. PROC OF THE BLOOD & BLOOD FORMING ORGANS W CC	GENERAL SURGERY			X	X	X	X	X
804	OTHER O.R. PROC OF THE BLOOD & BLOOD FORMING ORGANS W/O CC/MCC	GENERAL SURGERY			X	X	X	X	X
808	MAJOR HEMATOL/IMMUN DIAG EXC SICKLE CELL CRISIS & COAGUL W MCC	HEMATOLOGY	16	DISEASES AND DISORDERS OF THE BLOOD, BLOOD FORMING ORGANS AND IMMUNOLOGIC	X	X	X	X	X
809	MAJOR HEMATOL/IMMUN DIAG EXC SICKLE CELL CRISIS & COAGUL W CC	HEMATOLOGY	16	DISEASES AND DISORDERS OF THE BLOOD, BLOOD FORMING ORGANS AND IMMUNOLOGIC	X	X	X	X	X
810	MAJOR HEMATOL/IMMUN DIAG EXC SICKLE CELL CRISIS & COAGUL W/O CC/MCC	HEMATOLOGY	16	DISEASES AND DISORDERS OF THE BLOOD, BLOOD FORMING ORGANS AND IMMUNOLOGIC	X	X	X	X	X
811	RED BLOOD CELL DISORDERS W MCC	HEMATOLOGY	16	DISEASES AND DISORDERS OF THE BLOOD, BLOOD FORMING ORGANS AND IMMUNOLOGIC	X	X	X	X	X
812	RED BLOOD CELL DISORDERS W/O MCC	HEMATOLOGY	16	DISEASES AND DISORDERS OF THE BLOOD, BLOOD FORMING ORGANS AND IMMUNOLOGIC	X	X	X	X	X
813	COAGULATION DISORDERS	HEMATOLOGY	16	DISEASES AND DISORDERS OF THE BLOOD, BLOOD FORMING ORGANS AND IMMUNOLOGIC	X	X	X	X	X
814	RETICULOENDOTHELIAL & IMMUNITY DISORDERS W MCC	HEMATOLOGY	16	DISEASES AND DISORDERS OF THE BLOOD, BLOOD FORMING ORGANS AND IMMUNOLOGIC	X	X	X	X	X
815	RETICULOENDOTHELIAL & IMMUNITY DISORDERS W CC	HEMATOLOGY	16	DISEASES AND DISORDERS OF THE BLOOD, BLOOD FORMING ORGANS AND IMMUNOLOGIC	X	X	X	X	X
816	RETICULOENDOTHELIAL & IMMUNITY DISORDERS W/O CC/MCC	HEMATOLOGY	16	DISEASES AND DISORDERS OF THE BLOOD, BLOOD FORMING ORGANS AND IMMUNOLOGIC	X	X	X	X	X
820	LYMPHOMA & LEUKEMIA W MAJOR O.R. PROCEDURE W MCC	GENERAL SURGERY			X	X	X	X	X
821	LYMPHOMA & LEUKEMIA W MAJOR O.R. PROCEDURE W CC	GENERAL SURGERY			X	X	X	X	X
822	LYMPHOMA & LEUKEMIA W MAJOR O.R. PROCEDURE W/O CC/MCC	GENERAL SURGERY			X	X	X	X	X
823	LYMPHOMA & NON-ACUTE LEUKEMIA W OTHER O.R. PROC W MCC	GENERAL SURGERY			X	X	X	X	X
824	LYMPHOMA & NON-ACUTE LEUKEMIA W OTHER O.R. PROC W CC	GENERAL SURGERY			X	X	X	X	X
825	LYMPHOMA & NON-ACUTE LEUKEMIA W OTHER O.R. PROC W/O CC/MCC	GENERAL SURGERY			X	X	X	X	X
826	MYELOPROLIF DISORD OR POORLY DIFF NEOPL W MAJ O.R. PROC W MCC	GENERAL SURGERY			X	X	X	X	X
827	MYELOPROLIF DISORD OR POORLY DIFF NEOPL W MAJ O.R. PROC W CC	GENERAL SURGERY			X	X	X	X	X
828	MYELOPROLIF DISORD OR POORLY DIFF NEOPL W MAJ O.R. PROC W/O CC/MCC	GENERAL SURGERY			X	X	X	X	X
829	MYELOPROLIF DISORD OR POORLY DIFF NEOPL W OTHER O.R. PROC W CC/MCC	GENERAL SURGERY			X	X	X	X	X
830	MYELOPROLIF DISORD OR POORLY DIFF NEOPL W OTHER O.R. PROC W/O CC/MCC	GENERAL SURGERY			X	X	X	X	X
834	ACUTE LEUKEMIA W/O MAJOR O.R. PROCEDURE W MCC	ONCOLOGY MEDICAL	17	MYELOPROLIFERATIVE DISEASES AND DISORDERS, AND POORLY DIFFERENTIATED NEOP	X	X	X	X	X
835	ACUTE LEUKEMIA W/O MAJOR O.R. PROCEDURE W CC	ONCOLOGY MEDICAL	17	MYELOPROLIFERATIVE DISEASES AND DISORDERS, AND POORLY DIFFERENTIATED NEOP	X	X	X	X	X
836	ACUTE LEUKEMIA W/O MAJOR O.R. PROCEDURE W/O CC/MCC	ONCOLOGY MEDICAL	17	MYELOPROLIFERATIVE DISEASES AND DISORDERS, AND POORLY DIFFERENTIATED NEOP	X	X	X	X	X
837	CHEMO W ACUTE LEUKEMIA AS SDX OR W HIGH DOSE CHEMO AGENT W MCC	ONCOLOGY MEDICAL	17	MYELOPROLIFERATIVE DISEASES AND DISORDERS, AND POORLY DIFFERENTIATED NEOP	X	X	X	X	X
838	CHEMO W ACUTE LEUKEMIA AS SDX W CC OR HIGH DOSE CHEMO AGENT	ONCOLOGY MEDICAL	17	MYELOPROLIFERATIVE DISEASES AND DISORDERS, AND POORLY DIFFERENTIATED NEOP	X	X	X	X	X
839	CHEMO W ACUTE LEUKEMIA AS SDX W/O CC/MCC	ONCOLOGY MEDICAL	17	MYELOPROLIFERATIVE DISEASES AND DISORDERS, AND POORLY DIFFERENTIATED NEOP	X	X	X	X	X
840	LYMPHOMA & NON-ACUTE LEUKEMIA W MCC	ONCOLOGY MEDICAL	17	MYELOPROLIFERATIVE DISEASES AND DISORDERS, AND POORLY DIFFERENTIATED NEOP	X	X	X	X	X
841	LYMPHOMA & NON-ACUTE LEUKEMIA W CC	ONCOLOGY MEDICAL	17	MYELOPROLIFERATIVE DISEASES AND DISORDERS, AND POORLY DIFFERENTIATED NEOP	X	X	X	X	X
842	LYMPHOMA & NON-ACUTE LEUKEMIA W/O CC/MCC	ONCOLOGY MEDICAL	17	MYELOPROLIFERATIVE DISEASES AND DISORDERS, AND POORLY DIFFERENTIATED NEOP	X	X	X	X	X
843	OTHER MYELOPROLIF DIS OR POORLY DIFF NEOPL DIAG W MCC	ONCOLOGY MEDICAL	17	MYELOPROLIFERATIVE DISEASES AND DISORDERS, AND POORLY DIFFERENTIATED NEOP	X	X	X	X	X
844	OTHER MYELOPROLIF DIS OR POORLY DIFF NEOPL DIAG W CC	ONCOLOGY MEDICAL	17	MYELOPROLIFERATIVE DISEASES AND DISORDERS, AND POORLY DIFFERENTIATED NEOP	X	X	X	X	X
845	OTHER MYELOPROLIF DIS OR POORLY DIFF NEOPL DIAG W/O CC/MCC	ONCOLOGY MEDICAL	17	MYELOPROLIFERATIVE DISEASES AND DISORDERS, AND POORLY DIFFERENTIATED NEOP	X	X	X	X	X
846	CHEMOTHERAPY W/O ACUTE LEUKEMIA AS SECONDARY DIAGNOSIS W MCC	ONCOLOGY MEDICAL	17	MYELOPROLIFERATIVE DISEASES AND DISORDERS, AND POORLY DIFFERENTIATED NEOP	X	X	X	X	X
847	CHEMOTHERAPY W/O ACUTE LEUKEMIA AS SECONDARY DIAGNOSIS W CC	ONCOLOGY MEDICAL	17	MYELOPROLIFERATIVE DISEASES AND DISORDERS, AND POORLY DIFFERENTIATED NEOP	X	X	X	X	X
848	CHEMOTHERAPY W/O ACUTE LEUKEMIA AS SECONDARY DIAGNOSIS W/O CC/MCC	ONCOLOGY MEDICAL	17	MYELOPROLIFERATIVE DISEASES AND DISORDERS, AND POORLY DIFFERENTIATED NEOP	X	X	X	X	X
849	RADIOTHERAPY	ONCOLOGY MEDICAL	17	MYELOPROLIFERATIVE DISEASES AND DISORDERS, AND POORLY DIFFERENTIATED NEOP	X	X	X	X	X
853	INFECTIOUS & PARASITIC DISEASES W O.R. PROCEDURE W MCC	GENERAL SURGERY			X	X	X	X	X
854	INFECTIOUS & PARASITIC DISEASES W O.R. PROCEDURE W CC	GENERAL SURGERY			X	X	X	X	X
855	INFECTIOUS & PARASITIC DISEASES W O.R. PROCEDURE W/O CC/MCC	GENERAL SURGERY			X	X	X	X	X
856	POSTOPERATIVE OR POST-TRAUMATIC INFECTIONS W O.R. PROC W MCC	GENERAL SURGERY			X	X	X	X	X
857	POSTOPERATIVE OR POST-TRAUMATIC INFECTIONS W O.R. PROC W CC	GENERAL SURGERY			X	X	X	X	X
858	POSTOPERATIVE OR POST-TRAUMATIC INFECTIONS W O.R. PROC W/O CC/MCC	GENERAL SURGERY			X	X	X	X	X
862	POSTOPERATIVE & POST-TRAUMATIC INFECTIONS W MCC	GENERAL MEDICINE	18	INFECTIOUS AND PARASITIC DISEASES (SYSTEMIC OR UNSPECIFIED SITES)	X	X	X	X	X
863	POSTOPERATIVE & POST-TRAUMATIC INFECTIONS W/O MCC	GENERAL MEDICINE	18	INFECTIOUS AND PARASITIC DISEASES (SYSTEMIC OR UNSPECIFIED SITES)	X	X	X	X	X
864	FEVER	GENERAL MEDICINE	18	INFECTIOUS AND PARASITIC DISEASES (SYSTEMIC OR UNSPECIFIED SITES)	X	X	X	X	X
865	VIRAL ILLNESS W MCC	GENERAL MEDICINE	18	INFECTIOUS AND PARASITIC DISEASES (SYSTEMIC OR UNSPECIFIED SITES)	X	X	X	X	X
866	VIRAL ILLNESS W/O MCC	GENERAL MEDICINE	18	INFECTIOUS AND PARASITIC DISEASES (SYSTEMIC OR UNSPECIFIED SITES)	X	X	X	X	X
867	OTHER INFECTIOUS & PARASITIC DISEASES DIAGNOSES W MCC	GENERAL MEDICINE	18	INFECTIOUS AND PARASITIC DISEASES (SYSTEMIC OR UNSPECIFIED SITES)	X	X	X	X	X
868	OTHER INFECTIOUS & PARASITIC DISEASES DIAGNOSES W CC	GENERAL MEDICINE	18	INFECTIOUS AND PARASITIC DISEASES (SYSTEMIC OR UNSPECIFIED SITES)	X	X	X	X	X
869	OTHER INFECTIOUS & PARASITIC DISEASES DIAGNOSES W/O CC/MCC	GENERAL MEDICINE	18	INFECTIOUS AND PARASITIC DISEASES (SYSTEMIC OR UNSPECIFIED SITES)	X	X	X	X	X
870	SEPTICEMIA OR SEVERE SEPSIS W MV 96+ HOURS	GENERAL MEDICINE	18	INFECTIOUS AND PARASITIC DISEASES (SYSTEMIC OR UNSPECIFIED SITES)	X	X	X	X	X
871	SEPTICEMIA OR SEVERE SEPSIS W/O MV 96+ HOURS W MCC	GENERAL MEDICINE	18	INFECTIOUS AND PARASITIC DISEASES (SYSTEMIC OR UNSPECIFIED SITES)	X	X	X	X	X
872	SEPTICEMIA OR SEVERE SEPSIS W/O MV 96+ HOURS W/O MCC	GENERAL MEDICINE	18	INFECTIOUS AND PARASITIC DISEASES (SYSTEMIC OR UNSPECIFIED SITES)	X	X	X	X	X
876	O.R. PROCEDURE W PRINCIPAL DIAGNOSES OF MENTAL ILLNESS	GENERAL SURGERY			X	X	X	X	X
880	ACUTE ADJUSTMENT REACTION & PSYCHOSOCIAL DYSFUNCTION	PSYCH/DRUG ABUSE	19	MENTAL DISEASES AND DISORDERS	X	X	X	X	X
881	DEPRESSIVE NEUROSES	PSYCH/DRUG ABUSE	19	MENTAL DISEASES AND DISORDERS	X	X	X	X	X
882	NEUROSES EXCEPT DEPRESSIVE	PSYCH/DRUG ABUSE	19	MENTAL DISEASES AND DISORDERS	X	X	X	X	X
883	DISORDERS OF PERSONALITY & IMPULSE CONTROL	PSYCH/DRUG ABUSE	19	MENTAL DISEASES AND DISORDERS	X	X	X	X	X
884	ORGANIC DISTURBANCES & MENTAL RETARDATION	PSYCH/DRUG ABUSE	19	MENTAL DISEASES AND DISORDERS	X	X	X	X	X
885	PSYCHOSES	PSYCH/DRUG ABUSE	19	MENTAL DISEASES AND DISORDERS	X	X	X	X	X
886	BEHAVIORAL & DEVELOPMENTAL DISORDERS	PSYCH/DRUG ABUSE	19	MENTAL DISEASES AND DISORDERS	X	X	X	X	X
887	OTHER MENTAL DISORDER DIAGNOSES	PSYCH/DRUG ABUSE	19	MENTAL DISEASES AND DISORDERS	X	X	X	X	X
894	ALCOHOL/DRUG ABUSE OR DEPENDENCE, LEFT AMA	PSYCH/DRUG ABUSE	20	ALCOHOL/DRUG USE AND ALCOHOL/DRUG INDUCED ORGANIC MENTAL DISORDERS	X	X	X	X	X
895	ALCOHOL/DRUG ABUSE OR DEPENDENCE W REHABILITATION THERAPY	PSYCH/DRUG ABUSE	20	ALCOHOL/DRUG USE AND ALCOHOL/DRUG INDUCED ORGANIC MENTAL DISORDERS	X	X	X	X	X
896	ALCOHOL/DRUG ABUSE OR DEPENDENCE W/O REHABILITATION THERAPY W MCC	PSYCH/DRUG ABUSE	20	ALCOHOL/DRUG USE AND ALCOHOL/DRUG INDUCED ORGANIC MENTAL DISORDERS	X	X	X	X	X
897	ALCOHOL/DRUG ABUSE OR DEPENDENCE W/O REHABILITATION THERAPY W/O MCC	PSYCH/DRUG ABUSE	20	ALCOHOL/DRUG USE AND ALCOHOL/DRUG INDUCED ORGANIC MENTAL DISORDERS	X	X	X	X	X
901	WOUND DEBRIDEMENTS FOR INJURIES W MCC	GENERAL SURGERY			X	X	X	X	X
902	WOUND DEBRIDEMENTS FOR INJURIES W CC	GENERAL SURGERY			X	X	X	X	X
903	WOUND DEBRIDEMENTS FOR INJURIES W/O CC/MCC	GENERAL SURGERY			X	X	X	X	X
904	SKIN GRAFTS FOR INJURIES W CC/MCC	GENERAL SURGERY			X	X	X	X	X
905	SKIN GRAFTS FOR INJURIES W/O CC/MCC	GENERAL SURGERY			X	X	X	X	X
906	HAND PROCEDURES FOR INJURIES	ORTHOPEDICS	21	INJURIES, POISONINGS AND TOXIC EFFECTS OF DRUGS	X	X	X	X	X
907	OTHER O.R. PROCEDURES FOR INJURIES W MCC	GENERAL SURGERY			X	X	X	X	X
908	OTHER O.R. PROCEDURES FOR INJURIES W CC	GENERAL SURGERY			X	X	X	X	X
909	OTHER O.R. PROCEDURES FOR INJURIES W/O CC/MCC	GENERAL SURGERY			X	X	X	X	X
913	TRAUMATIC INJURY W MCC	TRAUMA	21	INJURIES, POISONINGS AND TOXIC EFFECTS OF DRUGS	X	X	X	X	X
914	TRAUMATIC INJURY W/O MCC	TRAUMA	21	INJURIES, POISONINGS AND TOXIC EFFECTS OF DRUGS	X	X	X	X	X
915	ALLERGIC REACTIONS W MCC	GENERAL MEDICINE	21	INJURIES, POISONINGS AND TOXIC EFFECTS OF DRUGS	X	X	X	X	X
916	ALLERGIC REACTIONS W/O MCC	GENERAL MEDICINE	21	INJURIES, POISONINGS AND TOXIC EFFECTS OF DRUGS	X	X	X	X	X
917	POISONING & TOXIC EFFECTS OF DRUGS W MCC	GENERAL MEDICINE	21	INJURIES, POISONINGS AND TOXIC EFFECTS OF DRUGS	X	X	X	X	X
918	POISONING & TOXIC EFFECTS OF DRUGS W/O MCC	GENERAL MEDICINE	21	INJURIES, POISONINGS AND TOXIC EFFECTS OF DRUGS	X	X	X	X	X
919	COMPLICATIONS OF TREATMENT W MCC	GENERAL MEDICINE	21	INJURIES, POISONINGS AND TOXIC EFFECTS OF DRUGS	X	X	X	X	X
920	COMPLICATIONS OF TREATMENT W CC	GENERAL MEDICINE	21	INJURIES, POISONINGS AND TOXIC EFFECTS OF DRUGS	X	X	X	X	X
921	COMPLICATIONS OF TREATMENT W/O CC/MCC	GENERAL MEDICINE	21	INJURIES, POISONINGS AND TOXIC EFFECTS OF DRUGS	X	X	X	X	X
922	OTHER INJURY, POISONING & TOXIC EFFECT DIAG W MCC	GENERAL MEDICINE	21	INJURIES, POISONINGS AND TOXIC EFFECTS OF DRUGS	X	X	X	X	X
923	OTHER INJURY, POISONING & TOXIC EFFECT DIAG W/O MCC	GENERAL MEDICINE	21	INJURIES, POISONINGS AND TOXIC EFFECTS OF DRUGS	X	X	X	X	X
927	EXTENSIVE BURNS OR FULL THICKNESS BURNS W MV 96+ HRS W SKIN GRAFT	TRAUMA	22	BURNS	X	X	X	X	X
928	FULL THICKNESS BURN W SKIN GRAFT OR INHAL INJ W CC/MCC	TRAUMA	22	BURNS	X	X	X	X	X
929	FULL THICKNESS BURN W SKIN GRAFT OR INHAL INJ W/O CC/MCC	TRAUMA	22	BURNS	X	X	X	X	X
933	EXTENSIVE BURNS OR FULL THICKNESS BURNS W MV 96+ HRS W/O SKIN GRAFT	TRAUMA	22	BURNS	X	X	X	X	X
934	FULL THICKNESS BURN W/O SKIN GRFT OR INHAL INJ	TRAUMA	22	BURNS	X	X	X	X	X
935	NON-EXTENSIVE BURNS	TRAUMA	22	BURNS	X	X	X	X	X
939	O.R. PROC W DIAGNOSES OF OTHER CONTACT W HEALTH SERVICES W MCC	GENERAL SURGERY			X	X	X	X	X
940	O.R. PROC W DIAGNOSES OF OTHER CONTACT W HEALTH SERVICES W CC	GENERAL SURGERY			X	X	X	X	X
941	O.R. PROC W DIAGNOSES OF OTHER CONTACT W HEALTH SERVICES W/O CC/MCC	GENERAL SURGERY			X	X	X	X	X
945	REHABILITATION W CC/MCC	GENERAL MEDICINE	23	FACTORS INFLUENCING HEALTH STATUS AND OTHER CONTACTS WITH HEALTH SERVICES	X	X	X	X	X
946	REHABILITATION W/O CC/MCC	GENERAL MEDICINE	23	FACTORS INFLUENCING HEALTH STATUS AND OTHER CONTACTS WITH HEALTH SERVICES	X	X	X	X	X
947	SIGNS & SYMPTOMS W MCC	GENERAL MEDICINE	23	FACTORS INFLUENCING HEALTH STATUS AND OTHER CONTACTS WITH HEALTH SERVICES	X	X	X	X	X
948	SIGNS & SYMPTOMS W/O MCC	GENERAL MEDICINE	23	FACTORS INFLUENCING HEALTH STATUS AND OTHER CONTACTS WITH HEALTH SERVICES	X	X	X	X	X
949	AFTERCARE W CC/MCC	GENERAL MEDICINE	23	FACTORS INFLUENCING HEALTH STATUS AND OTHER CONTACTS WITH HEALTH SERVICES	X	X	X	X	X
950	AFTERCARE W/O CC/MCC	GENERAL MEDICINE	23	FACTORS INFLUENCING HEALTH STATUS AND OTHER CONTACTS WITH HEALTH SERVICES	X	X	X	X	X
951	OTHER FACTORS INFLUENCING HEALTH STATUS	GENERAL MEDICINE	23	FACTORS INFLUENCING HEALTH STATUS AND OTHER CONTACTS WITH HEALTH SERVICES	X	X	X	X	X
955	CRANIOTOMY FOR MULTIPLE SIGNIFICANT TRAUMA	TRAUMA	24	MULTIPLE SIGNIFICANT TRAUMA	X	X	X	X	X
956	LIMB REATTACHMENT, HIP & FEMUR PROC FOR MULTIPLE SIGNIFICANT TRAUMA	TRAUMA	24	MULTIPLE SIGNIFICANT TRAUMA	X	X	X	X	X
957	OTHER O.R. PROCEDURES FOR MULTIPLE SIGNIFICANT TRAUMA W MCC	TRAUMA	24	MULTIPLE SIGNIFICANT TRAUMA	X	X	X	X	X
958	OTHER O.R. PROCEDURES FOR MULTIPLE SIGNIFICANT TRAUMA W CC	TRAUMA	24	MULTIPLE SIGNIFICANT TRAUMA	X	X	X	X	X
959	OTHER O.R. PROCEDURES FOR MULTIPLE SIGNIFICANT TRAUMA W/O CC/MCC	TRAUMA	24	MULTIPLE SIGNIFICANT TRAUMA	X	X	X	X	X
963	OTHER MULTIPLE SIGNIFICANT TRAUMA W MCC	TRAUMA	24	MULTIPLE SIGNIFICANT TRAUMA	X	X	X	X	X
964	OTHER MULTIPLE SIGNIFICANT TRAUMA W CC	TRAUMA	24	MULTIPLE SIGNIFICANT TRAUMA	X	X	X	X	X
965	OTHER MULTIPLE SIGNIFICANT TRAUMA W/O CC/MCC	TRAUMA	24	MULTIPLE SIGNIFICANT TRAUMA	X	X	X	X	X
981	EXTENSIVE O.R. PROCEDURE UNRELATED TO PRINCIPAL DIAGNOSIS W MCC	GENERAL SURGERY			X	X	X	X	X
982	EXTENSIVE O.R. PROCEDURE UNRELATED TO PRINCIPAL DIAGNOSIS W CC	GENERAL SURGERY			X	X	X	X	X
983	EXTENSIVE O.R. PROCEDURE UNRELATED TO PRINCIPAL DIAGNOSIS W/O CC/MCC	GENERAL SURGERY			X	X	X	X	X
984	PROSTATIC O.R. PROCEDURE UNRELATED TO PRINCIPAL DIAGNOSIS W MCC	GENERAL SURGERY			X	X	X	X	X
985	PROSTATIC O.R. PROCEDURE UNRELATED TO PRINCIPAL DIAGNOSIS W CC	GENERAL SURGERY			X	X	X	X	X
986	PROSTATIC O.R. PROCEDURE UNRELATED TO PRINCIPAL DIAGNOSIS W/O CC/MCC	GENERAL SURGERY			X	X	X	X	X
987	NON-EXTENSIVE O.R. PROC UNRELATED TO PRINCIPAL DIAGNOSIS W MCC	GENERAL SURGERY			X	X	X	X	X
988	NON-EXTENSIVE O.R. PROC UNRELATED TO PRINCIPAL DIAGNOSIS W CC	GENERAL SURGERY			X	X	X	X	X
989	NON-EXTENSIVE O.R. PROC UNRELATED TO PRINCIPAL DIAGNOSIS W/O CC/MCC	GENERAL SURGERY			X	X	X	X	X

## Sheet: MSDRG PRODUCT LINES INCLUDED
MSDRG PRODUCT LINE	PROJECT STATUS
CARDIOLOGY
DENTISTRY	EXCLUDED
DERMATOLOGY
ENDOCRINE
GASTROENTEROLOGY
GENERAL MEDICINE
GENERAL SURGERY
GYNECOLOGY
HEMATOLOGY
HIV	EXCLUDED
NEONATOLOGY
NEPHROLOGY
NEUROLOGY
NEUROSURGERY	EXCLUDED
NORMAL NEWBORNS
OB/DELIVERY
ONCOLOGY MEDICAL
OPEN HEART
OPHTHALMOLOGY
ORTHOPEDICS
OTHER	EXCLUDED
OTHER OB
OTOLARYNGOLOGY
PSYCH/DRUG ABUSE
PULMONARY
RHEUMATOLOGY
THORACIC SURGERY
TRAUMA
UROLOGY
VASCULAR SURGERY
